# Supplementary material for: Molecular and physiological responses of two quinoa genotypes to drought stress
Source: Front Genet. 2024 Aug 9;15:1439046. doi: 10.3389/fgene.2024.1439046 (PMC11341418; doi:10.3389/fgene.2024.1439046)
Supplement: Supplementary file 1 [file Table2.XLSX]

## Sheet:  hormone signal transduction
Table S2 Plant hormone signaling involves genes
Auxin	#ID	Name					HZ1-C3-vs-T3	HZ1-C9-vs-T9	L1-C3-vs-T3	L1-C9-vs-T9	Pfam_annotation	Swiss_Prot_annotation	NR_annotation
AUX1	AUR62023955	GABA-01	normal	up	normal	normal	0.795053	2.1342	-0.585902	-0.333403	Transmembrane amino acid transporter protein	GABA transporter 1 OS=Arabidopsis thaliana OX=3702 GN=GAT1 PE=1 SV=1	GABA transporter 1-like [Chenopodium quinoa]
AUX1	AUR62031750	GABA-02	normal	up	normal	normal	0.492648	2.51451	-0.0364796	0.0598112	Transmembrane amino acid transporter protein	GABA transporter 1 OS=Arabidopsis thaliana OX=3702 GN=GAT1 PE=1 SV=1	GABA transporter 1-like [Chenopodium quinoa]
AUX1	AUR62012229	Auxin-01	normal	normal	normal	down	0.504877	-0.637644	0.577153	-1.25637	Transmembrane amino acid transporter protein	Auxin transporter-like protein 2 OS=Medicago truncatula OX=3880 GN=LAX2 PE=2 SV=1	auxin transporter-like protein 2 [Chenopodium quinoa]
AUX1	AUR62022861	Auxin-02	normal	down	normal	down	0.474622	-1.122	0.45513	-1.63401	Transmembrane amino acid transporter protein	Auxin transporter-like protein 2 OS=Medicago truncatula OX=3880 GN=LAX2 PE=2 SV=1	auxin transporter-like protein 2 [Chenopodium quinoa]
AUX1	AUR62023630	Auxin-03	normal	normal	normal	down	-0.876374	-1.26173	0.0817186	-1.84965	Transmembrane amino acid transporter protein	Auxin transporter-like protein 3 OS=Medicago truncatula OX=3880 GN=LAX3 PE=2 SV=1	auxin transporter-like protein 3 [Chenopodium quinoa]
AUX1	AUR62041352	Auxin-04	normal	normal	normal	down	-0.249782	-0.84686	-0.29295	-1.97514	Transmembrane amino acid transporter protein	Auxin transporter-like protein 2 OS=Medicago truncatula OX=3880 GN=LAX2 PE=2 SV=1	auxin transporter-like protein 4 [Chenopodium quinoa]
AUX1	Chenopodium_quinoa_newGene_13569	Auxin-05	normal	normal	normal	down	-0.221067	-0.919629	-0.729663	-2.24446	Transmembrane amino acid transporter protein	Auxin transporter-like protein 4 OS=Medicago truncatula OX=3880 GN=LAX4 PE=2 SV=1	auxin transporter-like protein 4 [Chenopodium quinoa]
TIR1	AUR62000938	TIR1-01	normal	down	normal	down	0.0548372	-1.83319	0.176263	-1.18876	Transport inhibitor response 1 protein domain	Protein TRANSPORT INHIBITOR RESPONSE 1 OS=Arabidopsis thaliana OX=3702 GN=TIR1 PE=1 SV=2	protein TRANSPORT INHIBITOR RESPONSE 1-like [Chenopodium quinoa]
TIR1	AUR62005029	TIR1-02	normal	down	normal	down	0.0717017	-1.53333	0.241914	-1.12909	Transport inhibitor response 1 protein domain	Protein TRANSPORT INHIBITOR RESPONSE 1 OS=Arabidopsis thaliana OX=3702 GN=TIR1 PE=1 SV=2	protein TRANSPORT INHIBITOR RESPONSE 1-like [Chenopodium quinoa]
TIR1	AUR62014716	TIR1-03	normal	down	normal	down	-0.940295	-2.66835	-0.4033	-1.21096	Transport inhibitor response 1 protein domain	Protein TRANSPORT INHIBITOR RESPONSE 1 OS=Arabidopsis thaliana OX=3702 GN=TIR1 PE=1 SV=2	protein TRANSPORT INHIBITOR RESPONSE 1-like [Chenopodium quinoa]
TIR1	AUR62016895	TIR1-04	normal	down	normal	normal	-0.765252	-2.4549	-0.435131	-0.544969	Transport inhibitor response 1 protein domain	Protein TRANSPORT INHIBITOR RESPONSE 1 OS=Arabidopsis thaliana OX=3702 GN=TIR1 PE=1 SV=2	protein TRANSPORT INHIBITOR RESPONSE 1-like [Chenopodium quinoa]
TIR1	AUR62027846	TIR1-05	normal	down	normal	normal	-0.0376227	-1.20127	0.393363	-0.618702	Transport inhibitor response 1 protein domain	Transport inhibitor response 1-like protein OS=Arabidopsis thaliana OX=3702 GN=At5g49980 PE=2 SV=1	transport inhibitor response 1-like protein [Chenopodium quinoa]
TIR1	AUR62044564	TIR1-06	down	down	down	normal	-1.00116	-2.31654	-1.23013	-0.896271	Leucine Rich repeats (2 copies)	Protein TRANSPORT INHIBITOR RESPONSE 1 OS=Arabidopsis thaliana OX=3702 GN=TIR1 PE=1 SV=2	protein TRANSPORT INHIBITOR RESPONSE 1-like [Chenopodium quinoa]
TIR1	AUR62044616	TIR1-07	normal	normal	down	normal	-1.08799	-2.56361	-1.14977	-0.25788	Leucine Rich repeats (2 copies)	Protein TRANSPORT INHIBITOR RESPONSE 1 OS=Arabidopsis thaliana OX=3702 GN=TIR1 PE=1 SV=2	protein TRANSPORT INHIBITOR RESPONSE 1-like [Chenopodium quinoa]
AUX/IAA	AUR62002397	IAA01	normal	up	normal	normal	0.535556	1.20492	0.338083	0.929283	IQ calmodulin-binding motif	Protein IQ-DOMAIN 14 OS=Arabidopsis thaliana OX=3702 GN=IQD14 PE=1 SV=1	protein IQ-DOMAIN 14-like [Chenopodium quinoa]
AUX/IAA	AUR62014118	IAA02	--	up	--	--	--	2.98469	--	--	AUX/IAA family	Auxin-responsive protein IAA32 OS=Arabidopsis thaliana OX=3702 GN=IAA32 PE=1 SV=2	auxin-responsive protein IAA32-like [Chenopodium quinoa]
AUX/IAA	AUR62016420	IAA03	normal	up	normal	normal	0.736669	1.0769	0.830097	0.474464	AUX/IAA family	Auxin-responsive protein IAA17 OS=Arabidopsis thaliana OX=3702 GN=IAA17 PE=1 SV=2	auxin-responsive protein IAA1-like [Chenopodium quinoa]
AUX/IAA	AUR62031929	IAA04	normal	up	normal	normal	0.411639	1.23857	0.289734	0.594873	AUX/IAA family	Auxin-responsive protein IAA26 OS=Arabidopsis thaliana OX=3702 GN=IAA26 PE=1 SV=2	auxin-responsive protein IAA26-like [Chenopodium quinoa]
AUX/IAA	AUR62001004	IAA05	normal	down	normal	normal	-0.358468	-1.17146	0.0838424	0.464273	AUX/IAA family	Auxin-responsive protein IAA4 OS=Arabidopsis thaliana OX=3702 GN=IAA4 PE=1 SV=2	auxin-responsive protein IAA4-like [Chenopodium quinoa]
AUX/IAA	AUR62004952	IAA06	normal	down	normal	normal	-0.308414	-2.33523	0.189638	-0.310082	AUX/IAA family	Auxin-induced protein 22D OS=Vigna radiata var. radiata OX=3916 GN=AUX22D PE=2 SV=1	auxin-induced protein 22D-like [Chenopodium quinoa]
AUX/IAA	AUR62004953	IAA07	normal	down	normal	normal	-0.10924	-2.00543	-0.363259	-0.96065	AUX/IAA family	Auxin-responsive protein IAA4 OS=Arabidopsis thaliana OX=3702 GN=IAA4 PE=1 SV=2	auxin-responsive protein IAA4-like isoform X1 [Chenopodium quinoa]
AUX/IAA	AUR62005398	IAA08	normal	down	normal	normal	-0.491285	-2.16716	-0.322598	0.336021	AUX/IAA family	Auxin-responsive protein IAA9 OS=Arabidopsis thaliana OX=3702 GN=IAA9 PE=1 SV=1	uncharacterized protein LOC110708826 isoform X1 [Chenopodium quinoa]
AUX/IAA	AUR62011943	IAA09	normal	down	normal	down	0.0611482	-1.75964	-0.653025	-1.28385	AUX/IAA family	Auxin-induced protein 22D OS=Vigna radiata var. radiata OX=3916 GN=AUX22D PE=2 SV=1	auxin-induced protein 22D-like [Chenopodium quinoa]
AUX/IAA	AUR62016513	IAA10	normal	down	normal	normal	-0.232054	-1.29295	-0.367086	-0.974643	--	--	auxin-responsive protein IAA27-like [Chenopodium quinoa]
AUX/IAA	AUR62016514	IAA11	normal	down	normal	normal	-0.758536	-2.57151	-0.752663	-1.26084	AUX/IAA family	Auxin-responsive protein IAA27 OS=Arabidopsis thaliana OX=3702 GN=IAA27 PE=1 SV=1	auxin-responsive protein IAA27-like [Chenopodium quinoa]
AUX/IAA	AUR62031867	IAA12	normal	down	normal	normal	-0.469747	-1.15311	-0.537206	-0.288174	AUX/IAA family	Auxin-responsive protein IAA27 OS=Arabidopsis thaliana OX=3702 GN=IAA27 PE=1 SV=1	auxin-responsive protein IAA27-like [Chenopodium quinoa]
AUX/IAA	AUR62032258	IAA13	normal	down	normal	down	-0.0966778	-1.09997	-0.677541	-1.10137	AUX/IAA family	Auxin-induced protein 22D OS=Vigna radiata var. radiata OX=3916 GN=AUX22D PE=2 SV=1	auxin-induced protein 22D-like [Chenopodium quinoa]
AUX/IAA	AUR62043556	IAA14	normal	down	normal	normal	-0.0736952	-1.46151	-0.590301	0.0276689	AUX/IAA family	Auxin-responsive protein IAA8 OS=Arabidopsis thaliana OX=3702 GN=IAA8 PE=1 SV=1	uncharacterized protein LOC110708826 isoform X1 [Chenopodium quinoa]
AUX/IAA	AUR62011606	IAA15	normal	normal	normal	up	0.489457	0.775095	0.657463	1.28374	AUX/IAA family	Auxin-responsive protein IAA17 OS=Arabidopsis thaliana OX=3702 GN=IAA17 PE=1 SV=2	auxin-responsive protein IAA1-like [Chenopodium quinoa]
AUX/IAA	AUR62023669	IAA16	normal	normal	down	normal	-0.925166	-0.441123	-1.47564	-0.824364	AUX/IAA family	Auxin-responsive protein IAA4 OS=Oryza sativa subsp. indica OX=39946 GN=IAA4 PE=2 SV=1	auxin-responsive protein IAA31-like [Chenopodium quinoa]
AUX/IAA	AUR62034462	IAA17	down	--	normal	--	-1.82789	--	-1.44902	--	--	--	uncharacterized protein LOC110707387 [Chenopodium quinoa]
ARF	AUR62004743	ARF01	normal	up	normal	normal	0.706029	1.8097	0.623023	-0.0892545	Auxin response factor	Auxin response factor 8 OS=Arabidopsis thaliana OX=3702 GN=ARF8 PE=1 SV=2	auxin response factor 8-like isoform X2 [Chenopodium quinoa]
ARF	AUR62015175	ARF02	normal	up	normal	normal	0.378321	1.22311	0.504954	-0.039517	Auxin response factor	Auxin response factor 6 OS=Arabidopsis thaliana OX=3702 GN=ARF6 PE=1 SV=2	auxin response factor 6-like [Chenopodium quinoa]
ARF	AUR62017628	ARF03	normal	up	normal	normal	0.359273	1.06724	0.486968	-0.174324	Auxin response factor	Auxin response factor 6 OS=Arabidopsis thaliana OX=3702 GN=ARF6 PE=1 SV=2	auxin response factor 6-like [Chenopodium quinoa]
ARF	AUR62020722	ARF04	normal	up	normal	normal	0.361273	2.20954	0.363929	0.640035	Auxin response factor	Auxin response factor 19 OS=Oryza sativa subsp. japonica OX=39947 GN=ARF19 PE=2 SV=2	auxin response factor 19-like isoform X1 [Chenopodium quinoa]
ARF	AUR62027988	ARF05	normal	up	normal	normal	-0.0721115	1.41792	0.453438	0.730688	Auxin response factor	Auxin response factor 19 OS=Oryza sativa subsp. japonica OX=39947 GN=ARF19 PE=2 SV=2	auxin response factor 19-like isoform X1 [Chenopodium quinoa]
ARF	AUR62035726	ARF06	normal	up	normal	up	0.897576	3.61448	0.607419	1.84993	Auxin response factor	Auxin response factor 5 OS=Arabidopsis thaliana OX=3702 GN=ARF5 PE=1 SV=3	auxin response factor 5-like [Chenopodium quinoa]
ARF	AUR62037509	ARF07	normal	up	normal	normal	0.602132	1.44613	0.698693	-0.512868	Auxin response factor	Auxin response factor 8 OS=Arabidopsis thaliana OX=3702 GN=ARF8 PE=1 SV=2	auxin response factor 8-like isoform X2 [Chenopodium quinoa]
ARF	AUR62010868	ARF08	normal	down	normal	down	-0.282667	-1.54982	0.519163	-1.03606	Auxin response factor	Auxin response factor 9 OS=Arabidopsis thaliana OX=3702 GN=ARF9 PE=1 SV=1	auxin response factor 9-like isoform X2 [Chenopodium quinoa]
ARF	AUR62014884	ARF09	normal	down	normal	normal	-0.398339	-1.21126	-0.443203	-0.835574	Auxin response factor	Auxin response factor 3 OS=Arabidopsis thaliana OX=3702 GN=ARF3 PE=1 SV=2	auxin response factor 3-like [Chenopodium quinoa]
ARF	AUR62035439	ARF10	normal	normal	normal	up	0.59128	0.997009	0.534444	1.10302	Auxin response factor	Auxin response factor 5 OS=Arabidopsis thaliana OX=3702 GN=ARF5 PE=1 SV=3	auxin response factor 5-like [Chenopodium quinoa]
GH3	AUR62003949	GH3-01	normal	up	normal	normal	0.585765	2.48081	0.368339	0.741587	GH3 auxin-responsive promoter	Probable indole-3-acetic acid-amido synthetase GH3.1 OS=Arabidopsis thaliana OX=3702 GN=GH3.1 PE=2 SV=1	probable indole-3-acetic acid-amido synthetase GH3.1 isoform X1 [Chenopodium quinoa]
GH3	AUR62016887	GH3-02	normal	up	normal	normal	0.350688	1.2649	0.899855	-0.371336	GH3 auxin-responsive promoter	Probable indole-3-acetic acid-amido synthetase GH3.1 OS=Arabidopsis thaliana OX=3702 GN=GH3.1 PE=2 SV=1	probable indole-3-acetic acid-amido synthetase GH3.1 [Chenopodium quinoa]
GH3	AUR62029275	GH3-03	up	up	normal	up	1.57735	4.60144	0.0214319	3.0813	GH3 auxin-responsive promoter	Indole-3-acetic acid-amido synthetase GH3.5 OS=Arabidopsis thaliana OX=3702 GN=GH3.5 PE=1 SV=1	indole-3-acetic acid-amido synthetase GH3.5-like [Chenopodium quinoa]
GH3	AUR62034578	GH3-04	--	up	--	normal	--	3.48907	--	0.23941	GH3 auxin-responsive promoter	Probable indole-3-acetic acid-amido synthetase GH3.6 OS=Oryza sativa subsp. japonica OX=39947 GN=GH3.6 PE=2 SV=2	probable indole-3-acetic acid-amido synthetase GH3.6 [Chenopodium quinoa]
GH3	AUR62041150	GH3-05	normal	up	normal	up	0.154268	2.55665	0.547072	2.52276	GH3 auxin-responsive promoter	Indole-3-acetic acid-amido synthetase GH3.5 OS=Arabidopsis thaliana OX=3702 GN=GH3.5 PE=1 SV=1	indole-3-acetic acid-amido synthetase GH3.5-like [Chenopodium quinoa]
GH3	AUR62029131	GH3-06	normal	down	normal	normal	-0.30197	-1.51559	-0.403204	-0.77212	PPR repeat family	Pentatricopeptide repeat-containing protein At1g03560, mitochondrial OS=Arabidopsis thaliana OX=3702 GN=At1g03560 PE=2 SV=1	pentatricopeptide repeat-containing protein At1g03560, mitochondrial-like [Chenopodium quinoa]
GH3	AUR62037363	GH3-07	down	down	down	down	-1.86812	-4.74646	-1.42652	-3.00811	GH3 auxin-responsive promoter	Indole-3-acetic acid-amido synthetase GH3.10 OS=Arabidopsis thaliana OX=3702 GN=GH3.10 PE=2 SV=1	indole-3-acetic acid-amido synthetase GH3.10 [Chenopodium quinoa]
GH3	AUR62038264	GH3-08	normal	normal	normal	down	-0.0537115	-0.475226	0.443132	-1.79047	GH3 auxin-responsive promoter	Probable indole-3-acetic acid-amido synthetase GH3.1 OS=Arabidopsis thaliana OX=3702 GN=GH3.1 PE=2 SV=1	probable indole-3-acetic acid-amido synthetase GH3.1 [Chenopodium quinoa]
SAUR	AUR62006917	SAUR01	normal	up	normal	normal	0.320767	1.73895	-0.101384	0.172664	Auxin responsive protein	Auxin-responsive protein SAUR32 OS=Arabidopsis thaliana OX=3702 GN=SAUR32 PE=2 SV=1	hypothetical protein SOVF_162740 [Spinacia oleracea]
SAUR	AUR62011561	SAUR02	normal	up	normal	normal	0.263222	1.83233	0.558156	0.686251	Ataxin 2 SM domain	Polyadenylate-binding protein-interacting protein 3 OS=Arabidopsis thaliana OX=3702 GN=CID3 PE=2 SV=1	polyadenylate-binding protein-interacting protein 3-like isoform X1 [Chenopodium quinoa]
SAUR	AUR62010363	SAUR03	--	down	--	down	--	-3.7529	--	-4.30892	Auxin responsive protein	Auxin-responsive protein SAUR50 OS=Arabidopsis thaliana OX=3702 GN=SAUR50 PE=1 SV=1	auxin-responsive protein SAUR50 [Chenopodium quinoa]
SAUR	AUR62012958	SAUR04	normal	down	normal	--	-0.774641	-1.38087	-0.0911929	--	Auxin responsive protein	Auxin-responsive protein SAUR64 OS=Arabidopsis thaliana OX=3702 GN=SAUR64 PE=2 SV=1	auxin-responsive protein SAUR66-like [Chenopodium quinoa]
SAUR	AUR62012963	SAUR05	--	down	--	--	--	-2.39726	--	--	Auxin responsive protein	Auxin-responsive protein SAUR64 OS=Arabidopsis thaliana OX=3702 GN=SAUR64 PE=2 SV=1	auxin-responsive protein SAUR64-like [Chenopodium quinoa]
SAUR	AUR62035733	SAUR06	down	down	normal	normal	-1.7827	-1.50055	-0.582362	-0.678275	Auxin responsive protein	--	auxin-induced protein 10A5-like [Chenopodium quinoa]
SAUR	AUR62035740	SAUR07	normal	down	normal	down	0.0503634	-3.03987	-1.1343	-2.01352	Auxin responsive protein	Auxin-responsive protein SAUR50 OS=Arabidopsis thaliana OX=3702 GN=SAUR50 PE=1 SV=1	auxin-responsive protein SAUR50-like [Chenopodium quinoa]
SAUR	AUR62039926	SAUR08	normal	down	normal	normal	0.629037	-1.93268	0.134689	-0.185075	Auxin responsive protein	Auxin-responsive protein SAUR36 OS=Arabidopsis thaliana OX=3702 GN=SAUR36 PE=2 SV=1	auxin-responsive protein SAUR36-like [Chenopodium quinoa]
SAUR	AUR62040461	SAUR09	normal	down	normal	normal	-0.0647416	-1.11754	-0.438054	-0.345861	Translin family	--	translin-like [Chenopodium quinoa]
SAUR	AUR62035441	SAUR10	down	normal	normal	normal	-1.34634	-0.126378	-0.0876248	-0.276001	Auxin responsive protein	--	auxin-induced protein 10A5-like [Chenopodium quinoa]
SAUR	AUR62038739	SAUR11	down	--	--	--	-1.615	--	--	--	Auxin responsive protein	Auxin-responsive protein SAUR71 OS=Arabidopsis thaliana OX=3702 GN=SAUR71 PE=2 SV=1	probable cyclin-dependent serine/threonine-protein kinase DDB_G0292550 [Chenopodium quinoa]
SAUR	AUR62016876	SAUR12	--	--	down	--	--	--	-1.51163	--	Auxin responsive protein	Auxin-responsive protein SAUR24 OS=Arabidopsis thaliana OX=3702 GN=SAUR24 PE=2 SV=1	hypothetical protein SOVF_055610 [Spinacia oleracea]
SAUR	AUR62016857	SAUR13	--	--	--	down	--	--	--	-4.31737	Auxin responsive protein	Auxin-responsive protein SAUR50 OS=Arabidopsis thaliana OX=3702 GN=SAUR50 PE=1 SV=1	auxin-responsive protein SAUR50-like isoform X2 [Chenopodium quinoa]
SAUR	AUR62016878	SAUR14	normal	normal	normal	down	0.10022	-1.09909	-0.417468	-1.47149	Auxin responsive protein	Auxin-responsive protein SAUR21 OS=Arabidopsis thaliana OX=3702 GN=SAUR21 PE=2 SV=1	auxin-responsive protein SAUR21-like [Chenopodium quinoa]
SAUR	AUR62035740	SAUR15	normal	down	normal	down	0.0503634	-3.03987	-1.1343	-2.01352	Auxin responsive protein	Auxin-responsive protein SAUR50 OS=Arabidopsis thaliana OX=3702 GN=SAUR50 PE=1 SV=1	auxin-responsive protein SAUR50-like [Chenopodium quinoa]
BR
BAK1	AUR62000060	BAK1-01	--	up	--	--	--	2.03379	--	--	Protein kinase domain	G-type lectin S-receptor-like serine/threonine-protein kinase RLK1 OS=Arabidopsis thaliana OX=3702 GN=RLK1 PE=2 SV=2	G-type lectin S-receptor-like serine/threonine-protein kinase RLK1 [Chenopodium quinoa]
BAK1	AUR62000591	BAK1-02	normal	up	normal	normal	0.418036	1.84145	-0.851216	0.914178	Protein kinase domain	LEAF RUST 10 DISEASE-RESISTANCE LOCUS RECEPTOR-LIKE PROTEIN KINASE-like 2.5 OS=Arabidopsis thaliana OX=3702 GN=LRK10L-2.5 PE=3 SV=1	LEAF RUST 10 DISEASE-RESISTANCE LOCUS RECEPTOR-LIKE PROTEIN KINASE-like 2.5 [Chenopodium quinoa]
BAK1	AUR62005476	BAK1-03	normal	up	normal	normal	-0.467485	3.51739	-0.120172	0.661454	Protein tyrosine and serine/threonine kinase	Rust resistance kinase Lr10 OS=Triticum aestivum OX=4565 GN=LRK10 PE=2 SV=1	rust resistance kinase Lr10-like [Chenopodium quinoa]
BAK1	AUR62006585	BAK1-04	normal	up	normal	up	-0.283247	2.86285	0.00385241	1.75073	Protein kinase domain	G-type lectin S-receptor-like serine/threonine-protein kinase SD2-5 OS=Arabidopsis thaliana OX=3702 GN=SD25 PE=1 SV=1	G-type lectin S-receptor-like serine/threonine-protein kinase SD2-5 isoform X1 [Chenopodium quinoa]
BAK1	AUR62012590	BAK1-05	--	up	--	--	--	6.14094	--	--	Protein kinase domain	Cysteine-rich receptor-like protein kinase 25 OS=Arabidopsis thaliana OX=3702 GN=CRK25 PE=3 SV=1	cysteine-rich receptor-like protein kinase 10 isoform X1 [Chenopodium quinoa]
BAK1	AUR62013868	BAK1-06	normal	up	normal	normal	-0.307835	1.64423	0.0238892	0.0123832	Protein kinase domain	G-type lectin S-receptor-like serine/threonine-protein kinase LECRK3 OS=Oryza sativa subsp. japonica OX=39947 GN=LECRK3 PE=3 SV=2	G-type lectin S-receptor-like serine/threonine-protein kinase LECRK3 [Chenopodium quinoa]
BAK1	AUR62016382	BAK1-07	normal	up	normal	normal	-0.425544	2.01433	0.0126757	-0.717902	Protein tyrosine and serine/threonine kinase	Probable LRR receptor-like serine/threonine-protein kinase At1g07650 OS=Arabidopsis thaliana OX=3702 GN=At1g07650 PE=1 SV=1	uncharacterized protein LOC110698820 [Chenopodium quinoa]
BAK1	AUR62019533	BAK1-08	normal	up	normal	normal	-0.443357	2.76277	-0.225243	0.786562	Protein tyrosine and serine/threonine kinase	Cold-responsive protein kinase 1 OS=Arabidopsis thaliana OX=3702 GN=CRPK1 PE=1 SV=1	cold-responsive protein kinase 1-like isoform X1 [Chenopodium quinoa]
BAK1	AUR62020419	BAK1-09	normal	up	normal	down	0.321966	1.6054	-1.37447	-1.45498	Protein kinase domain	G-type lectin S-receptor-like serine/threonine-protein kinase At2g19130 OS=Arabidopsis thaliana OX=3702 GN=At2g19130 PE=2 SV=1	G-type lectin S-receptor-like serine/threonine-protein kinase At2g19130 [Chenopodium quinoa]
BAK1	AUR62020820	BAK1-10	--	up	--	up	--	2.7297	--	1.86611	Protein kinase domain	Receptor like protein kinase S.2 OS=Arabidopsis thaliana OX=3702 GN=LECRKS2 PE=2 SV=2	receptor like protein kinase S.2-like [Chenopodium quinoa]
BAK1	AUR62020822	BAK1-11	--	up	--	up	--	2.57635	--	1.92966	Protein kinase domain	Receptor like protein kinase S.2 OS=Arabidopsis thaliana OX=3702 GN=LECRKS2 PE=2 SV=2	receptor like protein kinase S.2-like [Chenopodium quinoa]
BAK1	AUR62036104	BAK1-12	normal	up	normal	normal	-0.121969	1.31305	-0.671521	0.592087	Protein tyrosine and serine/threonine kinase	Cold-responsive protein kinase 1 OS=Arabidopsis thaliana OX=3702 GN=CRPK1 PE=1 SV=1	cold-responsive protein kinase 1-like [Chenopodium quinoa]
BAK1	AUR62036724	BAK1-13	normal	up	normal	normal	-0.847933	3.318	0.107314	0.355058	Protein kinase domain	G-type lectin S-receptor-like serine/threonine-protein kinase LECRK3 OS=Oryza sativa subsp. japonica OX=39947 GN=LECRK3 PE=3 SV=2	LOW QUALITY PROTEIN: G-type lectin S-receptor-like serine/threonine-protein kinase LECRK3, partial [Chenopodium quinoa]
BAK1	AUR62041117	BAK1-14	normal	up	normal	normal	0.467464	1.20308	0.167042	-0.327538	Protein kinase domain	Probable receptor-like protein kinase At1g11050 OS=Arabidopsis thaliana OX=3702 GN=At1g11050 PE=2 SV=1	probable receptor-like protein kinase At1g11050 [Chenopodium quinoa]
BAK1	AUR62000235	BAK1-15	up	down	normal	normal	1.07149	-1.15352	0.264383	-0.195179	Protein kinase domain	G-type lectin S-receptor-like serine/threonine-protein kinase SD2-5 OS=Arabidopsis thaliana OX=3702 GN=SD25 PE=1 SV=1	G-type lectin S-receptor-like serine/threonine-protein kinase SD2-5 [Chenopodium quinoa]
BAK1	AUR62019238	BAK1-16	normal	down	normal	normal	-0.106745	-1.33525	-0.424749	-0.913089	Protein kinase domain	G-type lectin S-receptor-like serine/threonine-protein kinase RLK1 OS=Arabidopsis thaliana OX=3702 GN=RLK1 PE=2 SV=2	G-type lectin S-receptor-like serine/threonine-protein kinase LECRK3 [Chenopodium quinoa]
BAK1	AUR62012397	BAK1-17	normal	normal	normal	down	0.47797	0.732567	-0.0449068	-1.04613	Protein kinase domain	G-type lectin S-receptor-like serine/threonine-protein kinase SD2-5 OS=Arabidopsis thaliana OX=3702 GN=SD25 PE=1 SV=1	G-type lectin S-receptor-like serine/threonine-protein kinase SD2-5 [Chenopodium quinoa]
BAK1	AUR62026776	BAK1-18	normal	normal	normal	down	-0.827883	-0.963583	0.0369027	-1.57904	Protein kinase domain	Probable LRR receptor-like serine/threonine-protein kinase At1g56140 OS=Arabidopsis thaliana OX=3702 GN=At1g56140 PE=2 SV=2	probable LRR receptor-like serine/threonine-protein kinase At1g56140 [Chenopodium quinoa]
BAK1	AUR62039501	BAK1-19	normal	normal	normal	down	-0.635756	0.153134	-0.355782	-1.64625	Protein tyrosine and serine/threonine kinase	Probable LRR receptor-like serine/threonine-protein kinase RFK1 OS=Arabidopsis thaliana OX=3702 GN=RKF1 PE=1 SV=1	probable LRR receptor-like serine/threonine-protein kinase RFK1 isoform X4 [Chenopodium quinoa]
BAK1	AUR62017392	BAK1-20	up	normal	normal	normal	1.54336	0.0459505	1.45491	-0.821384	Protein tyrosine and serine/threonine kinase	Protein NSP-INTERACTING KINASE 3 OS=Arabidopsis thaliana OX=3702 GN=NIK3 PE=1 SV=1	probable LRR receptor-like serine/threonine-protein kinase At1g34110 [Chenopodium quinoa]
BAK1	AUR62035473	BAK1-21	down	normal	down	normal	-1.12056	-0.199342	-1.28453	-0.336745	Protein kinase domain	Cold-responsive protein kinase 1 OS=Arabidopsis thaliana OX=3702 GN=CRPK1 PE=1 SV=1	cold-responsive protein kinase 1-like isoform X1 [Chenopodium quinoa]
BAK1	Chenopodium_quinoa_newGene_10028	BAK1-22	normal	--	down	--	-0.424281	--	-1.17274	--	Protein kinase domain	Probable receptor-like protein kinase At5g20050 OS=Arabidopsis thaliana OX=3702 GN=At5g20050 PE=2 SV=1	probable receptor-like protein kinase At5g20050 [Chenopodium quinoa]
BRI1	AUR62002833	BRI1-01	normal	up	normal	normal	-0.722905	1.55243	-0.202623	-0.350991	Protein kinase domain	LEAF RUST 10 DISEASE-RESISTANCE LOCUS RECEPTOR-LIKE PROTEIN KINASE-like 2.1 OS=Arabidopsis thaliana OX=3702 GN=LRK10L-2.1 PE=3 SV=1	LEAF RUST 10 DISEASE-RESISTANCE LOCUS RECEPTOR-LIKE PROTEIN KINASE-like 2.1 isoform X2 [Chenopodium quinoa]
BRI1	AUR62008474	BRI1-02	normal	up	normal	up	0.955674	2.46395	-0.494774	1.0103	Protein kinase domain	Probable LRR receptor-like serine/threonine-protein kinase At1g74360 OS=Arabidopsis thaliana OX=3702 GN=At1g74360 PE=1 SV=1	probable LRR receptor-like serine/threonine-protein kinase At1g74360 [Chenopodium quinoa]
BRI1	AUR62008797	BRI1-03	normal	up	normal	normal	-0.55369	1.57078	-0.565733	0.337394	Protein tyrosine and serine/threonine kinase	Probable inactive receptor kinase At1g27190 OS=Arabidopsis thaliana OX=3702 GN=At1g27190 PE=1 SV=1	probable inactive receptor kinase At1g27190 [Chenopodium quinoa]
BRI1	AUR62010124	BRI1-04	--	up	--	--	--	2.25523	--	--	Protein kinase domain	MDIS1-interacting receptor like kinase 2 OS=Arabidopsis thaliana OX=3702 GN=MIK2 PE=1 SV=3	MDIS1-interacting receptor like kinase 2-like [Chenopodium quinoa]
BRI1	AUR62021617	BRI1-05	normal	up	normal	up	0.939004	3.94614	0.158889	1.64644	Leucine rich repeat	Probable LRR receptor-like serine/threonine-protein kinase At1g74360 OS=Arabidopsis thaliana OX=3702 GN=At1g74360 PE=1 SV=1	probable LRR receptor-like serine/threonine-protein kinase At1g74360 [Chenopodium quinoa]
BRI1	AUR62025442	BRI1-06	normal	up	normal	normal	-0.576098	1.3407	-0.399351	0.0445337	Protein tyrosine and serine/threonine kinase	Inactive LRR receptor-like serine/threonine-protein kinase BIR2 OS=Arabidopsis thaliana OX=3702 GN=BIR2 PE=1 SV=1	probable inactive receptor kinase At1g27190 [Chenopodium quinoa]
BRI1	AUR62027697	BRI1-07	normal	up	normal	up	1.00882	2.79438	1.0999	2.67191	Protein tyrosine and serine/threonine kinase	Calmodulin-binding receptor kinase CaMRLK OS=Arabidopsis thaliana OX=3702 GN=CAMRLK PE=1 SV=1	calmodulin-binding receptor kinase CaMRLK-like [Chenopodium quinoa]
BRI1	AUR62033214	BRI1-08	down	up	normal	--	-1.1531	1.84375	0.257202	--	Leucine rich repeat	Leucine-rich repeat receptor protein kinase MSP1 OS=Oryza sativa subsp. japonica OX=39947 GN=MSP1 PE=1 SV=1	leucine-rich repeat receptor protein kinase MSP1-like [Chenopodium quinoa]
BRI1	AUR62042534	BRI1-09	normal	up	normal	normal	-0.118299	1.44938	0.370762	-0.560958	SBP domain	Squamosa promoter-binding-like protein 16 OS=Arabidopsis thaliana OX=3702 GN=SPL16 PE=2 SV=2	squamosa promoter-binding-like protein 14 [Chenopodium quinoa]
BRI1	AUR62003502	BRI1-10	normal	down	normal	normal	0.830518	-1.10914	0.290367	-0.354191	Protein tyrosine and serine/threonine kinase	Serine/threonine-protein kinase BRI1-like 2 OS=Arabidopsis thaliana OX=3702 GN=BRL2 PE=1 SV=1	serine/threonine-protein kinase BRI1-like 2 [Chenopodium quinoa]
BRI1	AUR62006438	BRI1-11	normal	down	normal	down	-0.571826	-1.17096	-0.282089	-1.04334	Protein kinase domain	Probable inactive receptor kinase At5g58300 OS=Arabidopsis thaliana OX=3702 GN=At5g58300 PE=1 SV=1	probable inactive receptor kinase At5g58300 [Chenopodium quinoa]
BRI1	AUR62007890	BRI1-12	normal	down	normal	normal	-0.157747	-1.77595	0.357784	-0.797689	SBP domain	Squamosa promoter-binding-like protein 6 OS=Arabidopsis thaliana OX=3702 GN=SPL6 PE=1 SV=2	squamosa promoter-binding-like protein 6 isoform X1 [Chenopodium quinoa]
BRI1	AUR62012061	BRI1-13	normal	down	normal	normal	0.0378522	-1.95366	0.156772	-0.582601	SBP domain	Squamosa promoter-binding-like protein 17 OS=Oryza sativa subsp. japonica OX=39947 GN=SPL17 PE=2 SV=2	squamosa promoter-binding-like protein 17 [Chenopodium quinoa]
BRI1	AUR62019156	BRI1-14	--	down	--	--	--	-2.56301	--	--	Leucine rich repeat	Probable LRR receptor-like serine/threonine-protein kinase At4g36180 OS=Arabidopsis thaliana OX=3702 GN=At4g36180 PE=1 SV=1	probable LRR receptor-like serine/threonine-protein kinase At4g36180 [Chenopodium quinoa]
BRI1	AUR62022844	BRI1-15	normal	down	normal	down	-0.113775	-1.5344	0.278938	-1.4857	Protein kinase domain	Systemin receptor SR160 OS=Solanum peruvianum OX=4082 PE=1 SV=1	systemin receptor SR160-like [Chenopodium quinoa]
BRI1	AUR62024322	BRI1-16	normal	down	normal	normal	-0.0210583	-1.96449	-0.134391	-0.643217	SBP domain	Squamosa promoter-binding-like protein 17 OS=Oryza sativa subsp. japonica OX=39947 GN=SPL17 PE=2 SV=2	squamosa promoter-binding-like protein 17 isoform X2 [Chenopodium quinoa]
BRI1	AUR62026538	BRI1-17	normal	down	normal	down	0.147174	-1.10492	0.720317	-2.06128	Protein tyrosine and serine/threonine kinase	Probable inactive receptor kinase At1g27190 OS=Arabidopsis thaliana OX=3702 GN=At1g27190 PE=1 SV=1	probable inactive receptor kinase At1g27190 [Chenopodium quinoa]
BRI1	AUR62029793	BRI1-18	normal	down	normal	down	-0.854049	-1.75704	-0.629053	-1.2528	Protein kinase domain	Probable inactive receptor kinase At5g58300 OS=Arabidopsis thaliana OX=3702 GN=At5g58300 PE=1 SV=1	probable inactive receptor kinase At5g58300 [Chenopodium quinoa]
BRI1	AUR62037367	BRI1-19	normal	down	normal	down	-0.412604	-2.19454	0.591229	-1.61521	Protein kinase domain	Inactive leucine-rich repeat receptor-like serine/threonine-protein kinase At1g60630 OS=Arabidopsis thaliana OX=3702 GN=At1g60630 PE=2 SV=1	inactive leucine-rich repeat receptor-like serine/threonine-protein kinase At1g60630 [Chenopodium quinoa]
BRI1	AUR62038232	BRI1-20	down	down	down	down	-1.8106	-2.45305	-1.62918	-1.19201	Protein kinase domain	Probable inactive receptor kinase At5g67200 OS=Arabidopsis thaliana OX=3702 GN=At5g67200 PE=1 SV=1	probable inactive receptor kinase At5g67200 [Chenopodium quinoa]
BRI1	AUR62039446	BRI1-21	normal	down	normal	normal	-0.391016	-1.08853	0.658067	-0.92738	Protein tyrosine and serine/threonine kinase	Probable inactive receptor kinase At1g27190 OS=Arabidopsis thaliana OX=3702 GN=At1g27190 PE=1 SV=1	probable inactive receptor kinase At1g27190 [Chenopodium quinoa]
BRI1	AUR62003647	BRI1-22	down	normal	normal	normal	-1.15245	0.432287	-0.514317	-0.269269	Leucine rich repeat	Systemin receptor SR160 OS=Solanum peruvianum OX=4082 PE=1 SV=1	systemin receptor SR160-like [Chenopodium quinoa]
BRI1	AUR62017957	BRI1-23	down	normal	normal	normal	-1.27095	-0.13112	-0.746635	-0.93319	Protein kinase domain	Systemin receptor SR160 OS=Solanum peruvianum OX=4082 PE=1 SV=1	systemin receptor SR160-like [Chenopodium quinoa]
BRI1	AUR62025459	BRI1-24	down	normal	normal	--	-1.14258	-0.242204	-0.428977	--	Leucine rich repeat	MDIS1-interacting receptor like kinase 2 OS=Arabidopsis thaliana OX=3702 GN=MIK2 PE=1 SV=3	MDIS1-interacting receptor like kinase 2-like [Chenopodium quinoa]
BRI1	AUR62012211	BRI1-25	normal	normal	normal	down	0.371943	-0.341895	0.456157	-1.44663	Leucine rich repeat	Systemin receptor SR160 OS=Solanum peruvianum OX=4082 PE=1 SV=1	systemin receptor SR160-like [Chenopodium quinoa]
BRI1	AUR62025457	BRI1-26	normal	--	normal	down	0.706279	--	-0.747074	-1.89886	Protein kinase domain	MDIS1-interacting receptor like kinase 2 OS=Arabidopsis thaliana OX=3702 GN=MIK2 PE=1 SV=3	MDIS1-interacting receptor like kinase 2-like [Chenopodium quinoa]
BSK	AUR62010671	BSK01	normal	up	normal	up	0.307874	1.33176	0.678448	1.47017	Protein tyrosine and serine/threonine kinase	Serine/threonine-protein kinase BSK7 OS=Arabidopsis thaliana OX=3702 GN=BSK7 PE=3 SV=1	probable serine/threonine-protein kinase At5g41260 isoform X1 [Chenopodium quinoa]
BSK	AUR62017212	BSK02	normal	up	normal	up	0.473913	1.1259	0.324413	1.39856	Protein tyrosine and serine/threonine kinase	Serine/threonine-protein kinase BSK7 OS=Arabidopsis thaliana OX=3702 GN=BSK7 PE=3 SV=1	probable serine/threonine-protein kinase At5g41260 [Chenopodium quinoa]
BSK	AUR62036890	BSK03	normal	up	normal	normal	-0.0336323	1.50175	0.0700027	0.213833	Protein tyrosine and serine/threonine kinase	Serine/threonine-protein kinase BSK1 OS=Arabidopsis thaliana OX=3702 GN=BSK1 PE=1 SV=1	probable serine/threonine-protein kinase At4g35230 [Chenopodium quinoa]
BSK	AUR62043387	BSK04	normal	up	normal	normal	0.199602	1.12297	0.0967135	0.238783	Protein tyrosine and serine/threonine kinase	Serine/threonine-protein kinase BSK1 OS=Arabidopsis thaliana OX=3702 GN=BSK1 PE=1 SV=1	probable serine/threonine-protein kinase At4g35230 [Chenopodium quinoa]
BSK	Chenopodium_quinoa_newGene_11754	BSK05	normal	up	normal	normal	1.37041	6.03286	-0.00968879	-0.243498	Protein tyrosine and serine/threonine kinase	Serine/threonine-protein kinase BSK6 OS=Arabidopsis thaliana OX=3702 GN=BSK6 PE=1 SV=1	probable serine/threonine-protein kinase BSK3 [Chenopodium quinoa]
BSK	AUR62041588	BSK06	normal	down	normal	normal	-0.307677	-1.33309	-0.424801	-0.516263	Protein kinase domain	Serine/threonine-protein kinase BSK2 OS=Arabidopsis thaliana OX=3702 GN=BSK2 PE=1 SV=1	probable serine/threonine-protein kinase At4g35230 isoform X2 [Chenopodium quinoa]
BSK	AUR62001718	BSK07	normal	normal	normal	down	-0.0213151	-0.585609	0.159198	-1.09053	Protein tyrosine and serine/threonine kinase	Serine/threonine-protein kinase BSK5 OS=Arabidopsis thaliana OX=3702 GN=BSK5 PE=1 SV=1	probable serine/threonine-protein kinase BSK3 [Chenopodium quinoa]
BKI1	AUR62038636	BKI01	normal	down	normal	normal	-0.119406	-1.58188	-0.0994563	-0.68348	--	Probable membrane-associated kinase regulator 1 OS=Arabidopsis thaliana OX=3702 GN=MAKR1 PE=1 SV=1	probable membrane-associated kinase regulator 1 [Chenopodium quinoa]
TCH4	AUR62008061	TCH4-01	down	--	--	--	-2.08882	--	--	--	Glycosyl hydrolases family 16	Xyloglucan endotransglucosylase/hydrolase protein 22 OS=Arabidopsis thaliana OX=3702 GN=XTH22 PE=1 SV=1	xyloglucan endotransglucosylase/hydrolase protein 22-like [Chenopodium quinoa]
TCH4	AUR62018298	TCH4-02	down	down	down	normal	-2.9704	-1.4436	-2.45678	0.427536	Glycosyl hydrolases family 16	Probable xyloglucan endotransglucosylase/hydrolase protein 23 OS=Arabidopsis thaliana OX=3702 GN=XTH23 PE=2 SV=1	probable xyloglucan endotransglucosylase/hydrolase protein 23 [Chenopodium quinoa]
TCH4	AUR62018906	TCH4-03	down	up	normal	normal	-1.95542	3.5553	-1.00239	0.465117	Glycosyl hydrolases family 16	Xyloglucan endotransglucosylase/hydrolase protein 22 OS=Arabidopsis thaliana OX=3702 GN=XTH22 PE=1 SV=1	probable xyloglucan endotransglucosylase/hydrolase protein 23 [Chenopodium quinoa]
TCH4	AUR62024860	TCH4-04	down	down	down	normal	-3.08602	-3.70713	-1.71338	-0.387646	Glycosyl hydrolases family 16	Probable xyloglucan endotransglucosylase/hydrolase protein 23 OS=Arabidopsis thaliana OX=3702 GN=XTH23 PE=2 SV=1	probable xyloglucan endotransglucosylase/hydrolase protein 23 [Chenopodium quinoa]
TCH4	AUR62024861	TCH4-05	down	down	normal	normal	-3.37712	-2.11787	-1.3044	0.00540792	Glycosyl hydrolases family 16	Probable xyloglucan endotransglucosylase/hydrolase protein 23 OS=Arabidopsis thaliana OX=3702 GN=XTH23 PE=2 SV=1	probable xyloglucan endotransglucosylase/hydrolase protein 23 [Chenopodium quinoa]
TCH4	AUR62024862	TCH4-06	down	down	down	normal	-2.63399	-3.02722	-1.89468	-0.938062	Glycosyl hydrolases family 16	Probable xyloglucan endotransglucosylase/hydrolase protein 23 OS=Arabidopsis thaliana OX=3702 GN=XTH23 PE=2 SV=1	probable xyloglucan endotransglucosylase/hydrolase protein 23 [Chenopodium quinoa]
TCH4	AUR62027741	TCH4-07	down	up	normal	up	-1.22287	8.58418	-0.514812	4.05622	Glycosyl hydrolases family 16	Probable xyloglucan endotransglucosylase/hydrolase protein 23 OS=Arabidopsis thaliana OX=3702 GN=XTH23 PE=2 SV=1	probable xyloglucan endotransglucosylase/hydrolase protein 23 [Chenopodium quinoa]
TCH4	AUR62027742	TCH4-08	down	up	normal	normal	-1.79986	3.17395	-0.700962	0.634196	Glycosyl hydrolases family 16	Probable xyloglucan endotransglucosylase/hydrolase protein 23 OS=Arabidopsis thaliana OX=3702 GN=XTH23 PE=2 SV=1	probable xyloglucan endotransglucosylase/hydrolase protein 23 [Chenopodium quinoa]
TCH4	AUR62028638	TCH4-09	down	up	normal	up	-1.81177	3.67393	0.367513	2.19995	Glycosyl hydrolases family 16	Xyloglucan endotransglucosylase/hydrolase protein 22 OS=Arabidopsis thaliana OX=3702 GN=XTH22 PE=1 SV=1	xyloglucan endotransglucosylase/hydrolase protein 22-like [Chenopodium quinoa]
TCH4	AUR62031656	TCH4-10	down	down	down	normal	-3.21911	-1.45844	-2.41848	0.974138	Glycosyl hydrolases family 16	Probable xyloglucan endotransglucosylase/hydrolase protein 23 OS=Arabidopsis thaliana OX=3702 GN=XTH23 PE=2 SV=1	probable xyloglucan endotransglucosylase/hydrolase protein 23 [Chenopodium quinoa]
TCH4	AUR62032361	TCH4-11	down	down	down	normal	-4.1962	-4.34434	-2.81387	-0.419664	Glycosyl hydrolases family 16	Probable xyloglucan endotransglucosylase/hydrolase protein 23 OS=Arabidopsis thaliana OX=3702 GN=XTH23 PE=2 SV=1	probable xyloglucan endotransglucosylase/hydrolase protein 23 [Chenopodium quinoa]
TCH4	AUR62032362	TCH4-12	down	normal	normal	up	-1.64156	-0.488615	-0.381021	1.29869	Glycosyl hydrolases family 16	Probable xyloglucan endotransglucosylase/hydrolase protein 23 OS=Arabidopsis thaliana OX=3702 GN=XTH23 PE=2 SV=1	probable xyloglucan endotransglucosylase/hydrolase protein 23 [Chenopodium quinoa]
TCH4	AUR62018907	TCH4-13	normal	up	normal	normal	-0.879485	4.43333	-0.540593	1.3757	Glycosyl hydrolases family 16	Probable xyloglucan endotransglucosylase/hydrolase protein 23 OS=Arabidopsis thaliana OX=3702 GN=XTH23 PE=2 SV=1	probable xyloglucan endotransglucosylase/hydrolase protein 23 [Chenopodium quinoa]
CYCD3	AUR62010271	CYCD3-01	normal	down	normal	down	-0.0778525	-2.89065	0.227202	-1.39129	Cyclin, N-terminal domain	Cyclin-D3-1 OS=Arabidopsis thaliana OX=3702 GN=CYCD3-1 PE=1 SV=3	cyclin-D3-1-like [Chenopodium quinoa]
CYCD3	AUR62013251	CYCD3-02	normal	down	normal	down	-0.649341	-3.53296	0.00937281	-2.43164	Cyclin, N-terminal domain	Cyclin-D3-1 OS=Arabidopsis thaliana OX=3702 GN=CYCD3-1 PE=1 SV=3	cyclin-D3-1-like [Chenopodium quinoa]
CYTO
CRE1	AUR62028914	CRE1-01	normal	up	normal	normal	0.250965	1.15467	0.267054	-0.0520099	CHASE domain	Histidine kinase 3 OS=Arabidopsis thaliana OX=3702 GN=AHK3 PE=1 SV=1	histidine kinase 3-like [Chenopodium quinoa]
CRE1	AUR62015027	CRE1-02	normal	down	normal	normal	0.14248	-1.16775	0.323386	-0.828804	CHASE domain	Histidine kinase 2 OS=Arabidopsis thaliana OX=3702 GN=AHK2 PE=1 SV=1	histidine kinase 2-like [Chenopodium quinoa]
CRE1	AUR62037701	CRE1-03	normal	normal	normal	down	0.0580392	-0.263256	0.0978771	-1.84458	Histidine kinase-, DNA gyrase B-, and HSP90-like ATPase	Histidine kinase 5 OS=Arabidopsis thaliana OX=3702 GN=AHK5 PE=1 SV=1	histidine kinase 5-like [Chenopodium quinoa]
AHP	AUR62009233	AHP01	up	down	normal	normal	1.11892	-1.73337	0.250881	-0.318265	Hpt domain	Histidine-containing phosphotransfer protein 4 OS=Arabidopsis thaliana OX=3702 GN=AHP4 PE=1 SV=2	histidine-containing phosphotransfer protein 4-like isoform X1 [Chenopodium quinoa]
AHP	AUR62040233	AHP02	up	down	normal	normal	1.33505	-1.26835	1.33171	-0.22875	Hpt domain	Histidine-containing phosphotransfer protein 4 OS=Arabidopsis thaliana OX=3702 GN=AHP4 PE=1 SV=2	histidine-containing phosphotransfer protein 4-like isoform X2 [Chenopodium quinoa]
AHP	Chenopodium_quinoa_newGene_3704	AHP03	normal	down	normal	normal	-0.29378	-1.15719	0.14124	0.0427106	--	--	histidine-containing phosphotransfer protein 5-like isoform X2 [Chenopodium quinoa]
B-ARR	AUR62001964	B-ARR01	normal	up	normal	normal	-0.752957	2.16298	-0.981048	0.747381	Myb-like DNA-binding domain	Transcription factor HHO5 OS=Arabidopsis thaliana OX=3702 GN=HHO5 PE=1 SV=1	transcription factor HHO5-like [Chenopodium quinoa]
B-ARR	AUR62003842	B-ARR02	normal	up	normal	up	-0.326006	2.58504	-0.829379	1.11361	Myb-like DNA-binding domain	Transcription factor NIGTH1 OS=Oryza sativa subsp. japonica OX=39947 GN=NHO1 PE=1 SV=2	transcription factor HHO5-like [Chenopodium quinoa]
B-ARR	AUR62011426	B-ARR03	up	up	normal	normal	1.35857	2.36649	0.563044	0.605576	Myb-like DNA-binding domain	Myb family transcription factor EFM OS=Arabidopsis thaliana OX=3702 GN=EFM PE=1 SV=2	transcription factor HHO6-like [Chenopodium quinoa]
B-ARR	AUR62012124	B-ARR04	normal	up	normal	normal	-0.0874516	1.10408	0.0746127	0.813713	Myb-like DNA-binding domain	Transcription factor BOA OS=Arabidopsis thaliana OX=3702 GN=BOA PE=2 SV=1	transcription factor PCL1-like [Chenopodium quinoa]
B-ARR	AUR62012461	B-ARR05	normal	up	normal	normal	0.901984	1.23817	0.447279	0.0684949	Response regulator receiver domain	Two-component response regulator ARR12 OS=Arabidopsis thaliana OX=3702 GN=ARR12 PE=2 SV=2	two-component response regulator ARR12-like [Chenopodium quinoa]
B-ARR	AUR62016155	B-ARR06	normal	up	normal	normal	-0.174934	1.31901	-0.232832	0.162375	Response regulator receiver domain	Two-component response regulator ARR1 OS=Arabidopsis thaliana OX=3702 GN=ARR1 PE=1 SV=2	two-component response regulator ARR2-like isoform X3 [Chenopodium quinoa]
B-ARR	AUR62035070	B-ARR07	normal	up	normal	normal	0.0125479	1.33505	-0.269972	0.169547	Response regulator receiver domain	Two-component response regulator ARR1 OS=Arabidopsis thaliana OX=3702 GN=ARR1 PE=1 SV=2	two-component response regulator ARR2-like isoform X2 [Chenopodium quinoa]
B-ARR	AUR62040712	B-ARR08	normal	up	normal	normal	0.565919	1.51359	0.396852	0.496324	Myb-like DNA-binding domain	Transcription factor BOA OS=Arabidopsis thaliana OX=3702 GN=BOA PE=2 SV=1	transcription factor PCL1-like [Chenopodium quinoa]
B-ARR	AUR62012048	B-ARR09	normal	down	normal	normal	-0.0488265	-1.92023	-0.74931	-0.607338	MYB-CC type transfactor, LHEQLE motif	Myb family transcription factor PHL5 OS=Arabidopsis thaliana OX=3702 GN=PHL5 PE=2 SV=1	myb family transcription factor PHL5-like [Chenopodium quinoa]
B-ARR	AUR62012280	B-ARR10	normal	down	--	normal	-0.566906	-1.79291	--	-0.344384	Myb-like DNA-binding domain	Putative Myb family transcription factor At1g14600 OS=Arabidopsis thaliana OX=3702 GN=At1g14600 PE=2 SV=2	two-component response regulator ARR10-like [Chenopodium quinoa]
B-ARR	AUR62018645	B-ARR11	normal	down	normal	normal	-0.158652	-1.93496	-0.319787	-0.0764267	Myb-like DNA-binding domain	Probable transcription factor KAN2 OS=Arabidopsis thaliana OX=3702 GN=KAN2 PE=2 SV=1	probable transcription factor KAN2 [Chenopodium quinoa]
B-ARR	AUR62019553	B-ARR12	normal	down	normal	normal	-0.530164	-2.07066	-0.203815	-0.884747	Myb-like DNA-binding domain	Probable transcription factor GLK1 OS=Oryza sativa subsp. japonica OX=39947 GN=GLK1 PE=2 SV=1	transcription activator GLK1-like isoform X1 [Chenopodium quinoa]
B-ARR	AUR62024316	B-ARR13	normal	down	normal	normal	-0.295461	-2.68322	-0.75534	-1.00334	MYB-CC type transfactor, LHEQLE motif	Myb family transcription factor PHL5 OS=Arabidopsis thaliana OX=3702 GN=PHL5 PE=2 SV=1	myb family transcription factor PHL5-like [Chenopodium quinoa]
B-ARR	AUR62025689	B-ARR14	normal	down	normal	normal	-0.929838	-1.31523	-0.780471	-0.243956	MYB-CC type transfactor, LHEQLE motif	Myb family transcription factor PHL6 OS=Arabidopsis thaliana OX=3702 GN=PHL6 PE=2 SV=1	myb family transcription factor PHL6-like isoform X1 [Chenopodium quinoa]
B-ARR	AUR62037878	B-ARR15	normal	down	normal	normal	-0.6209	-1.13983	-0.00674249	-0.505088	Myb-like DNA-binding domain	Probable transcription factor GLK1 OS=Oryza sativa subsp. japonica OX=39947 GN=GLK1 PE=2 SV=1	transcription activator GLK1-like [Chenopodium quinoa]
B-ARR	AUR62016634	B-ARR16	up	normal	normal	normal	1.3926	0.653027	0.704371	0.0837866	Myb-like DNA-binding domain	Myb family transcription factor EFM OS=Arabidopsis thaliana OX=3702 GN=EFM PE=1 SV=2	transcription factor HHO6-like [Chenopodium quinoa]
B-ARR	AUR62002914	B-ARR17	normal	normal	down	normal	0.697384	-0.25708	-1.11562	0.572915	Myb-like DNA-binding domain	Transcription factor HHO2 OS=Arabidopsis thaliana OX=3702 GN=HHO2 PE=1 SV=1	transcription factor HHO3-like [Chenopodium quinoa]
B-ARR	AUR62035274	B-ARR18	normal	normal	down	normal	0.932229	0.108134	-1.26192	0.695787	Myb-like DNA-binding domain	Transcription factor HHO3 OS=Arabidopsis thaliana OX=3702 GN=HHO3 PE=1 SV=1	transcription factor HHO3-like [Chenopodium quinoa]
B-ARR	AUR62024182	B-ARR19	normal	normal	normal	up	0.311624	1.2814	0.24166	1.19558	Response regulator receiver domain	Two-component response regulator ARR11 OS=Arabidopsis thaliana OX=3702 GN=ARR11 PE=1 SV=1	two-component response regulator ARR11-like [Chenopodium quinoa]
A-ARR	AUR62019064	A-ARR01	normal	down	normal	normal	0.91315	-1.66173	-0.60815	-0.804356	--	Two-component response regulator ARR9 OS=Arabidopsis thaliana OX=3702 GN=ARR9 PE=1 SV=1	two-component response regulator ORR9-like isoform X1 [Chenopodium quinoa]
A-ARR	AUR62030343	A-ARR02	normal	down	normal	normal	-0.378424	-2.0703	-0.0571361	-0.409438	Response regulator receiver domain	Two-component response regulator ARR9 OS=Arabidopsis thaliana OX=3702 GN=ARR9 PE=1 SV=1	two-component response regulator ORR9-like [Chenopodium quinoa]
A-ARR	AUR62031057	A-ARR03	--	down	--	--	--	-2.57456	--	--	Response regulator receiver domain	Two-component response regulator ARR6 OS=Arabidopsis thaliana OX=3702 GN=ARR6 PE=1 SV=2	two-component response regulator ARR6-like isoform X2 [Chenopodium quinoa]
A-ARR	AUR62040831	A-ARR04	normal	down	normal	normal	0.0565094	-1.96244	-0.576881	-0.615225	Response regulator receiver domain	Two-component response regulator ARR9 OS=Arabidopsis thaliana OX=3702 GN=ARR9 PE=1 SV=1	two-component response regulator ARR9 [Chenopodium quinoa]
GI
GID1	AUR62027837	G1D1-01	up	normal	normal	normal	1.58177	-0.0636258	0.327202	-0.246287	alpha/beta hydrolase fold	Probable carboxylesterase 18 OS=Arabidopsis thaliana OX=3702 GN=CXE18 PE=1 SV=1	probable carboxylesterase 18 [Chenopodium quinoa]
GID1	AUR62034591	G1D1-02	up	up	up	up	1.5514	3.94922	1.33768	1.83568	alpha/beta hydrolase fold	Gibberellin receptor GID1B OS=Arabidopsis thaliana OX=3702 GN=GID1B PE=1 SV=1	gibberellin receptor GID1B-like [Chenopodium quinoa]
GID1	AUR62036678	G1D1-03	up	up	normal	up	1.43922	2.7817	1.26747	1.6234	alpha/beta hydrolase fold	Gibberellin receptor GID1B OS=Arabidopsis thaliana OX=3702 GN=GID1B PE=1 SV=1	gibberellin receptor GID1B-like [Chenopodium quinoa]
GID1	AUR62044726	G1D1-04	up	up	normal	up	1.46605	2.8825	0.97971	1.50472	alpha/beta hydrolase fold	Gibberellin receptor GID1B OS=Arabidopsis thaliana OX=3702 GN=GID1B PE=1 SV=1	gibberellin receptor GID1B-like [Chenopodium quinoa]
GID1	AUR62018995	G1D1-05	up	up	normal	up	1.12381	2.97816	1.12629	2.10227	alpha/beta hydrolase fold	Probable carboxylesterase 18 OS=Arabidopsis thaliana OX=3702 GN=CXE18 PE=1 SV=1	probable carboxylesterase 18 [Chenopodium quinoa]
GID1	AUR62031693	G1D1-06	normal	up	normal	normal	0.460137	1.36193	0.262362	0.501135	alpha/beta hydrolase fold	Probable carboxylesterase 6 OS=Arabidopsis thaliana OX=3702 GN=CXE6 PE=2 SV=1	probable carboxylesterase 6 [Chenopodium quinoa]
GID1	AUR62032575	G1D1-07	normal	up	normal	normal	0.569458	3.02503	0.664237	1.28695	alpha/beta hydrolase fold	Probable carboxylesterase 6 OS=Arabidopsis thaliana OX=3702 GN=CXE6 PE=2 SV=1	probable carboxylesterase 6 [Chenopodium quinoa]
GID1	AUR62036304	G1D1-08	normal	down	normal	down	-0.529847	-1.26533	-0.127944	-1.32346	alpha/beta hydrolase fold	Probable carboxylesterase 15 OS=Arabidopsis thaliana OX=3702 GN=CXE15 PE=2 SV=1	probable carboxylesterase 15 [Chenopodium quinoa]
GID1	AUR62038414	G1D1-09	normal	--	normal	down	-0.660225	--	-0.326565	-2.39296	alpha/beta hydrolase fold	Probable carboxylesterase 15 OS=Arabidopsis thaliana OX=3702 GN=CXE15 PE=2 SV=1	probable carboxylesterase 15 [Chenopodium quinoa]
GID2	AUR62038187	GID2	--	up	--	normal	--	2.69054	--	0.659701	--	F-box protein At2g27310 OS=Arabidopsis thaliana OX=3702 GN=At2g27310 PE=2 SV=1	probable F-box protein At2g36090 [Chenopodium quinoa]
DELLA	AUR62001766	DELLA-01	normal	up	normal	normal	0.856495	2.12477	0.413163	-0.35249	GRAS domain family	Scarecrow-like protein 14 OS=Arabidopsis thaliana OX=3702 GN=SCL14 PE=1 SV=2	scarecrow-like protein 30 [Chenopodium quinoa]
DELLA	AUR62001768	DELLA-02	normal	up	normal	normal	0.42986	1.03222	0.0268001	0.157301	GRAS domain family	Scarecrow-like protein 14 OS=Arabidopsis thaliana OX=3702 GN=SCL14 PE=1 SV=2	scarecrow-like protein 33 [Chenopodium quinoa]
DELLA	AUR62009551	DELLA-03	up	up	normal	normal	1.18707	2.28815	0.645871	0.351236	GRAS domain family	Scarecrow-like protein 14 OS=Arabidopsis thaliana OX=3702 GN=SCL14 PE=1 SV=2	scarecrow-like protein 30 [Chenopodium quinoa]
DELLA	AUR62012109	DELLA-04	normal	up	normal	normal	0.104247	1.3126	0.230471	-0.362926	GRAS domain family	Scarecrow-like protein 14 OS=Arabidopsis thaliana OX=3702 GN=SCL14 PE=1 SV=2	scarecrow-like protein 9 [Chenopodium quinoa]
DELLA	AUR62026798	DELLA-05	normal	up	normal	normal	0.6427	2.59947	0.0254022	0.822224	GRAS domain family	Scarecrow-like protein 1 OS=Arabidopsis thaliana OX=3702 GN=SCL1 PE=2 SV=1	scarecrow-like protein 1 [Chenopodium quinoa]
DELLA	AUR62027115	DELLA-06	normal	up	normal	normal	0.3359	1.24666	0.362201	0.38235	GRAS domain family	Protein SCARECROW OS=Ipomoea nil OX=35883 GN=SCR PE=1 SV=1	protein SCARECROW-like isoform X1 [Chenopodium quinoa]
DELLA	AUR62029264	DELLA-07	normal	up	normal	normal	-0.497919	1.60769	-0.120092	0.794558	GRAS domain family	Chitin-inducible gibberellin-responsive protein 1 OS=Oryza sativa subsp. japonica OX=39947 GN=CIGR1 PE=2 SV=1	chitin-inducible gibberellin-responsive protein 1-like [Chenopodium quinoa]
DELLA	AUR62039362	DELLA-08	normal	up	normal	normal	0.446643	1.16614	0.224906	-0.158242	GRAS domain family	Scarecrow-like protein 14 OS=Arabidopsis thaliana OX=3702 GN=SCL14 PE=1 SV=2	scarecrow-like protein 9 [Chenopodium quinoa]
DELLA	Chenopodium_quinoa_newGene_1622	DELLA-09	normal	up	normal	normal	0.265318	1.28367	-0.125659	0.636907	GRAS domain family	Scarecrow-like protein 1 OS=Arabidopsis thaliana OX=3702 GN=SCL1 PE=2 SV=1	scarecrow-like protein 1 [Chenopodium quinoa]
DELLA	AUR62003986	DELLA-10	--	down	normal	--	--	-2.43371	0.186598	--	GRAS domain family	Scarecrow-like protein 32 OS=Arabidopsis thaliana OX=3702 GN=SCL32 PE=1 SV=1	scarecrow-like protein 32 [Chenopodium quinoa]
DELLA	AUR62004009	DELLA-11	normal	down	normal	normal	0.149142	-1.53819	-0.0255114	0.039137	GRAS domain family	Protein SHORT-ROOT OS=Arabidopsis thaliana OX=3702 GN=SHR PE=1 SV=1	protein SHORT-ROOT-like [Chenopodium quinoa]
DELLA	AUR62007503	DELLA-12	normal	down	normal	normal	-0.247189	-1.02465	-0.221713	-0.315656	GRAS domain family	Scarecrow-like protein 6 OS=Arabidopsis thaliana OX=3702 GN=SCL6 PE=1 SV=1	scarecrow-like protein 6 isoform X1 [Chenopodium quinoa]
DELLA	AUR62012891	DELLA-13	normal	down	normal	down	-0.579781	-1.52944	-0.790165	-1.13874	GRAS domain family	Protein SCARECROW OS=Pisum sativum OX=3888 GN=SCR PE=2 SV=1	protein SCARECROW 2-like [Chenopodium quinoa]
DELLA	AUR62036843	DELLA-14	normal	down	normal	normal	-0.857693	-1.43703	-0.501453	-0.723429	RWP-RK domain	Protein NLP4 OS=Arabidopsis thaliana OX=3702 GN=NLP4 PE=2 SV=1	protein NLP4-like [Chenopodium quinoa]
DELLA	AUR62039956	DELLA-15	normal	down	normal	normal	-0.547586	-1.11993	-0.219998	-0.822495	GRAS domain family	Scarecrow-like protein 6 OS=Arabidopsis thaliana OX=3702 GN=SCL6 PE=1 SV=1	scarecrow-like protein 6 isoform X1 [Chenopodium quinoa]
DELLA	AUR62040813	DELLA-16	down	down	normal	normal	-1.03518	-1.02549	-0.58847	-0.798658	RWP-RK domain	Protein NLP4 OS=Arabidopsis thaliana OX=3702 GN=NLP4 PE=2 SV=1	protein NLP4-like isoform X2 [Chenopodium quinoa]
DELLA	AUR62000171	DELLA-17	normal	normal	normal	up	0.38728	0.693534	0.599741	1.25669	GRAS domain family	Scarecrow-like protein 3 OS=Arabidopsis thaliana OX=3702 GN=SCL3 PE=1 SV=1	scarecrow-like protein 3 [Chenopodium quinoa]
DELLA	AUR62007012	DELLA-18	normal	normal	normal	down	-0.170824	-0.43923	0.415888	-1.05197	RWP-RK domain	Protein NLP7 OS=Arabidopsis thaliana OX=3702 GN=NLP7 PE=1 SV=2	protein NLP6-like [Chenopodium quinoa]
DELLA	AUR62007560	DELLA-19	normal	normal	normal	down	-0.182904	-0.68481	-0.801274	-1.26238	GRAS domain family	SCARECROW-LIKE protein 7 OS=Populus euphratica OX=75702 GN=SCL7 PE=2 SV=1	scarecrow-like protein 4 [Chenopodium quinoa]
DELLA	AUR62009552	DELLA-20	normal	normal	normal	down	0.984356	0.938941	-0.518992	-1.3749	GRAS domain family	Scarecrow-like protein 14 OS=Arabidopsis thaliana OX=3702 GN=SCL14 PE=1 SV=2	scarecrow-like protein 30 [Chenopodium quinoa]
DELLA	AUR62019876	DELLA-21	normal	normal	normal	down	-0.127238	-0.414573	0.295696	-1.09176	RWP-RK domain	Protein NLP7 OS=Arabidopsis thaliana OX=3702 GN=NLP7 PE=1 SV=2	protein NLP6-like [Chenopodium quinoa]
DELLA	AUR62001765	DELLA-22	up	normal	normal	normal	1.06854	0.52932	0.206087	-1.05608	GRAS domain family	Scarecrow-like protein 14 OS=Arabidopsis thaliana OX=3702 GN=SCL14 PE=1 SV=2	scarecrow-like protein 30 [Chenopodium quinoa]
TF	AUR62000483	BHLH01	normal	up	normal	up	0.462832	1.50373	0.313772	1.01378	Helix-loop-helix DNA-binding domain	Transcription factor PHYTOCHROME INTERACTING FACTOR-LIKE 15 OS=Oryza sativa subsp. japonica OX=39947 GN=PIL15 PE=1 SV=2	transcription factor PIF3-like isoform X2 [Chenopodium quinoa]
TF	AUR62006825	BHLH02	normal	up	normal	normal	0.633014	1.04716	0.746295	-0.0414394	Helix-loop-helix DNA-binding domain	Transcription factor PHYTOCHROME INTERACTING FACTOR-LIKE 15 OS=Oryza sativa subsp. japonica OX=39947 GN=PIL15 PE=1 SV=2	transcription factor PIF3-like isoform X2 [Chenopodium quinoa]
TF	AUR62011824	BHLH03	--	up	normal	up	--	2.61162	0.750013	1.66936	Domain of unknown function (DUF4228)	Transcription factor SPATULA OS=Arabidopsis thaliana OX=3702 GN=SPT PE=1 SV=1	uncharacterized protein LOC110734311 [Chenopodium quinoa]
TF	AUR62005693	BHLH04	normal	down	normal	normal	0.618146	-2.06136	0.480119	-0.685602	Helix-loop-helix DNA-binding domain	bHLH transcription factor RHL1 OS=Lotus japonicus OX=34305 GN=RHL1 PE=2 SV=1	formin-B-like [Chenopodium quinoa]
TF	AUR62021604	BHLH05	normal	down	normal	down	-0.536348	-2.50209	-0.38566	-1.58379	Helix-loop-helix DNA-binding domain	Transcription factor UNE10 OS=Arabidopsis thaliana OX=3702 GN=UNE10 PE=2 SV=1	transcription factor PIF7-like [Chenopodium quinoa]
TF	AUR62028866	BHLH06	normal	down	--	normal	0.115183	-1.49744	--	-0.556183	Helix-loop-helix DNA-binding domain	bHLH transcription factor RHL1 OS=Lotus japonicus OX=34305 GN=RHL1 PE=2 SV=1	formin-B-like [Chenopodium quinoa]
TF	AUR62008898	BHLH07	normal	normal	normal	down	0.197907	-0.199955	0.653683	-1.15065	Helix-loop-helix DNA-binding domain	Transcription factor PIF1 OS=Arabidopsis thaliana OX=3702 GN=PIF1 PE=1 SV=1	transcription factor PIF1-like [Chenopodium quinoa]
ABA
PYR/PYL	AUR62004471	PYL01	up	normal	normal	normal	1.39111	-0.567066	0.450992	0.462711	Polyketide cyclase / dehydrase and lipid transport	Abscisic acid receptor PYL8 OS=Arabidopsis thaliana OX=3702 GN=PYL8 PE=1 SV=1	abscisic acid receptor PYL8-like [Chenopodium quinoa]
PYR/PYL	AUR62023479	PYL02	up	normal	normal	normal	1.82717	-0.186359	0.36033	-0.0554513	Polyketide cyclase / dehydrase and lipid transport	Abscisic acid receptor PYL9 OS=Arabidopsis thaliana OX=3702 GN=PYL9 PE=1 SV=1	abscisic acid receptor PYL9-like [Chenopodium quinoa]
PYR/PYL	AUR62022950	PYL03	down	--	down	--	-2.40785	--	-3.06711	--	Polyketide cyclase / dehydrase and lipid transport	Abscisic acid receptor PYL4 OS=Arabidopsis thaliana OX=3702 GN=PYL4 PE=1 SV=1	abscisic acid receptor PYL4-like [Chenopodium quinoa]
PYR/PYL	AUR62030521	PYL04	down	--	down	--	-1.3352	--	-1.38522	--	Polyketide cyclase / dehydrase and lipid transport	Abscisic acid receptor PYL4 OS=Arabidopsis thaliana OX=3702 GN=PYL4 PE=1 SV=1	abscisic acid receptor PYL4-like [Chenopodium quinoa]
PYR/PYL	AUR62007289	PYL05	normal	down	normal	normal	-0.859371	-1.72328	-0.183273	-0.522738	Polyketide cyclase / dehydrase and lipid transport	Abscisic acid receptor PYL1 OS=Arabidopsis thaliana OX=3702 GN=PYL1 PE=1 SV=1	abscisic acid receptor PYR1-like [Chenopodium quinoa]
PP2C	AUR62001731	PP2C01	up	up	up	up	3.73077	4.14571	3.06243	3.322	Protein phosphatase 2C	Protein phosphatase 2C 3 OS=Arabidopsis thaliana OX=3702 GN=AIP1 PE=1 SV=1	probable protein phosphatase 2C 24 isoform X2 [Chenopodium quinoa]
PP2C	AUR62006130	PP2C02	up	up	normal	up	2.52188	5.88216	1.05864	4.01684	Protein phosphatase 2C	Probable protein phosphatase 2C 8 OS=Oryza sativa subsp. japonica OX=39947 GN=Os01g0656200 PE=2 SV=1	probable protein phosphatase 2C 8 isoform X1 [Chenopodium quinoa]
PP2C	AUR62010911	PP2C03	up	up	up	up	1.55363	1.82547	1.62646	1.16118	Protein phosphatase 2C	Probable protein phosphatase 2C 6 OS=Oryza sativa subsp. japonica OX=39947 GN=PP2C06 PE=1 SV=1	probable protein phosphatase 2C 6 [Chenopodium quinoa]
PP2C	AUR62012136	PP2C04	up	normal	normal	normal	1.40433	-0.270825	0.627112	0.563775	Protein phosphatase 2C	Protein phosphatase 2C 37 OS=Arabidopsis thaliana OX=3702 GN=PP2CA PE=1 SV=1	protein phosphatase 2C 37-like [Chenopodium quinoa]
PP2C	AUR62019358	PP2C05	up	up	up	up	2.7523	4.76907	2.22169	3.63992	Protein phosphatase 2C	Probable protein phosphatase 2C 8 OS=Oryza sativa subsp. japonica OX=39947 GN=Os01g0656200 PE=2 SV=1	probable protein phosphatase 2C 8 [Chenopodium quinoa]
PP2C	AUR62021414	PP2C06	up	up	up	up	1.50343	2.0301	1.84829	1.60084	Protein phosphatase 2C	Probable protein phosphatase 2C 6 OS=Oryza sativa subsp. japonica OX=39947 GN=PP2C06 PE=1 SV=1	probable protein phosphatase 2C 6 [Chenopodium quinoa]
PP2C	AUR62040699	PP2C07	up	normal	normal	normal	1.36466	-0.633668	0.193013	0.329322	Protein phosphatase 2C	Protein phosphatase 2C 37 OS=Arabidopsis thaliana OX=3702 GN=PP2CA PE=1 SV=1	protein phosphatase 2C 37-like [Chenopodium quinoa]
PP2C	AUR62010834	PP2C08	--	up	--	--	--	3.45307	--	--	Protein phosphatase 2C	Probable protein phosphatase 2C 8 OS=Oryza sativa subsp. japonica OX=39947 GN=Os01g0656200 PE=2 SV=1	probable protein phosphatase 2C 8 [Chenopodium quinoa]
PP2C	AUR62010835	PP2C09	--	up	--	--	--	6.97999	--	--	Protein phosphatase 2C	Probable protein phosphatase 2C 8 OS=Oryza sativa subsp. japonica OX=39947 GN=Os01g0656200 PE=2 SV=1	probable protein phosphatase 2C 8 [Chenopodium quinoa]
PP2C	AUR62019833	PP2C10	--	up	--	--	--	6.88252	--	--	Protein phosphatase 2C	Probable protein phosphatase 2C 8 OS=Oryza sativa subsp. japonica OX=39947 GN=Os01g0656200 PE=2 SV=1	probable protein phosphatase 2C 8 [Chenopodium quinoa]
PP2C	AUR62020044	PP2C11	--	up	--	normal	--	8.00328	--	1.80538	Protein phosphatase 2C	Probable protein phosphatase 2C 24 OS=Arabidopsis thaliana OX=3702 GN=At2g29380 PE=1 SV=1	probable protein phosphatase 2C 24 [Chenopodium quinoa]
PP2C	AUR62025109	PP2C12	normal	up	normal	normal	0.57964	1.12954	0.705118	0.149595	Protein phosphatase 2C	Protein phosphatase 2C 53 OS=Oryza sativa subsp. japonica OX=39947 GN=PP2C53 PE=1 SV=1	probable protein phosphatase 2C 50 [Chenopodium quinoa]
PP2C	AUR62029021	PP2C13	normal	up	normal	normal	0.617038	1.28567	0.693275	0.178278	Protein phosphatase 2C	Protein phosphatase 2C 53 OS=Oryza sativa subsp. japonica OX=39947 GN=PP2C53 PE=1 SV=1	probable protein phosphatase 2C 50 [Chenopodium quinoa]
PP2C	AUR62042678	PP2C14	normal	down	normal	normal	-0.268675	-1.23897	-0.00844223	-0.668722	Protein phosphatase 2C	Probable protein phosphatase 2C 52 OS=Arabidopsis thaliana OX=3702 GN=At4g03415 PE=1 SV=1	probable protein phosphatase 2C 52 [Chenopodium quinoa]
PP2C	Chenopodium_quinoa_newGene_2186	PP2C15	normal	normal	down	normal	0.00706618	0.253382	-1.25646	-0.307499	Protein phosphatase 2C	Probable protein phosphatase 2C 12 OS=Oryza sativa subsp. japonica OX=39947 GN=Os02g0224100 PE=2 SV=1	probable protein phosphatase 2C 12 [Chenopodium quinoa]
SNRK2	AUR62001966	SnRK2-01	normal	up	normal	normal	0.661397	2.02719	0.571185	0.651243	Protein kinase domain	Serine/threonine-protein kinase SRK2I OS=Arabidopsis thaliana OX=3702 GN=SRK2I PE=1 SV=1	serine/threonine-protein kinase SRK2I-like [Chenopodium quinoa]
SNRK2	AUR62003254	SnRK2-02	up	up	normal	normal	1.26514	1.63206	0.638309	1.00411	Protein kinase domain	Serine/threonine-protein kinase SAPK2 OS=Oryza sativa subsp. indica OX=39946 GN=SAPK2 PE=2 SV=2	serine/threonine-protein kinase SAPK1-like [Chenopodium quinoa]
SNRK2	AUR62003840	SnRK2-03	normal	up	normal	normal	0.881635	2.50768	0.732378	0.853718	Protein kinase domain	Serine/threonine-protein kinase SRK2I OS=Arabidopsis thaliana OX=3702 GN=SRK2I PE=1 SV=1	serine/threonine-protein kinase SRK2I-like [Chenopodium quinoa]
SNRK2	AUR62018955	SnRK2-04	normal	up	normal	normal	0.918293	2.31406	0.104945	-0.147669	Protein kinase domain	Serine/threonine-protein kinase SRK2E OS=Arabidopsis thaliana OX=3702 GN=SRK2E PE=1 SV=1	serine/threonine-protein kinase SAPK2-like [Chenopodium quinoa]
SNRK2	AUR62027801	SnRK2-05	up	up	normal	up	1.17176	3.00616	0.536916	1.12641	Protein kinase domain	Serine/threonine-protein kinase SAPK2 OS=Oryza sativa subsp. indica OX=39946 GN=SAPK2 PE=2 SV=2	serine/threonine-protein kinase SAPK2-like isoform X1 [Chenopodium quinoa]
SNRK2	AUR62003399	SnRK2-06	normal	down	normal	normal	-0.264169	-1.12846	-0.647887	-0.0108767	Cobalt transport protein	Protein ABCI12, chloroplastic OS=Arabidopsis thaliana OX=3702 GN=ABCI12 PE=1 SV=1	protein ABCI12, chloroplastic-like [Chenopodium quinoa]
SNRK2	AUR62007175	SnRK2-07	down	down	normal	up	-1.56082	-1.07495	-0.430757	1.2393	Protein kinase domain	Serine/threonine-protein kinase SAPK3 OS=Oryza sativa subsp. indica OX=39946 GN=SAPK3 PE=1 SV=2	serine/threonine-protein kinase SAPK3-like [Chenopodium quinoa]
SNRK2	AUR62016637	SnRK2-08	normal	down	normal	normal	-0.069745	-1.11162	0.000427123	-0.903948	Protein kinase domain	Serine/threonine-protein kinase SRK2E OS=Arabidopsis thaliana OX=3702 GN=SRK2E PE=1 SV=1	serine/threonine-protein kinase SRK2E-like isoform X1 [Chenopodium quinoa]
SNRK2	AUR62018830	SnRK2-09	down	normal	normal	normal	-1.08938	0.265059	-0.101308	1.03891	Protein kinase domain	Serine/threonine-protein kinase SAPK3 OS=Oryza sativa subsp. indica OX=39946 GN=SAPK3 PE=1 SV=2	serine/threonine-protein kinase SAPK3-like [Chenopodium quinoa]
ABF	AUR62001422	BZIP01	up	normal	up	up	1.09217	0.350381	1.39075	1.07245	bZIP transcription factor	ABSCISIC ACID-INSENSITIVE 5-like protein 5 OS=Arabidopsis thaliana OX=3702 GN=ABF2 PE=1 SV=1	bZIP transcription factor 23-like [Chenopodium quinoa]
ABF	AUR62026695	BZIP02	up	normal	normal	normal	1.17458	0.820219	0.659115	-0.252609	bZIP transcription factor	G-box-binding factor 4 OS=Arabidopsis thaliana OX=3702 GN=GBF4 PE=1 SV=1	G-box-binding factor 4-like isoform X1 [Chenopodium quinoa]
ABF	AUR62006793	BZIP03	normal	up	normal	up	0.997037	1.73278	0.982845	1.33441	bZIP transcription factor	ABSCISIC ACID-INSENSITIVE 5-like protein 3 OS=Arabidopsis thaliana OX=3702 GN=DPBF4 PE=1 SV=1	ABSCISIC ACID-INSENSITIVE 5-like protein 2 [Chenopodium quinoa]
ABF	AUR62013594	BZIP04	normal	up	normal	normal	0.905528	1.30614	0.623188	0.163957	--	G-box-binding factor 4 OS=Arabidopsis thaliana OX=3702 GN=GBF4 PE=1 SV=1	G-box-binding factor 4-like [Chenopodium quinoa]
ABF	AUR62013917	BZIP05	normal	down	normal	down	-0.193758	-1.37887	-0.53339	-1.65452	bZIP transcription factor	bZIP transcription factor 27 OS=Arabidopsis thaliana OX=3702 GN=FDP PE=1 SV=1	bZIP transcription factor 27-like isoform X1 [Chenopodium quinoa]
ABF	AUR62018275	BZIP06	normal	down	normal	down	-0.650151	-2.18579	-0.878002	-2.03134	bZIP transcription factor	Protein FD OS=Arabidopsis thaliana OX=3702 GN=FD PE=1 SV=1	protein FD-like isoform X2 [Chenopodium quinoa]
ABF	AUR62020955	BZIP07	normal	down	normal	normal	0.192338	-1.14606	-0.120738	0.150205	bZIP transcription factor	ABSCISIC ACID-INSENSITIVE 5-like protein 2 OS=Arabidopsis thaliana OX=3702 GN=DPBF3 PE=1 SV=1	ABSCISIC ACID-INSENSITIVE 5-like protein 2 [Chenopodium quinoa]
ETH
ETR	AUR62002259	ETR01	up	up	normal	normal	1.32096	1.17669	0.163129	-0.303385	Response regulator receiver domain	Ethylene receptor 2 OS=Arabidopsis thaliana OX=3702 GN=ETR2 PE=1 SV=2	ethylene receptor 2-like [Chenopodium quinoa]
ETR	AUR62008716	ETR02	normal	up	normal	normal	0.300396	1.4079	0.418478	-0.157817	Histidine kinase-, DNA gyrase B-, and HSP90-like ATPase	Probable ethylene response sensor 1 OS=Oryza sativa subsp. indica OX=39946 GN=ERS1 PE=2 SV=1	probable ethylene response sensor 1 [Chenopodium quinoa]
ETR	AUR62015476	ETR03	up	up	normal	normal	1.03342	1.87956	0.521817	0.528678	Response regulator receiver domain	Ethylene receptor 2 OS=Arabidopsis thaliana OX=3702 GN=ETR2 PE=1 SV=2	ethylene receptor 2-like [Chenopodium quinoa]
ETR	AUR62025518	ETR04	normal	up	normal	normal	0.323028	1.25376	0.176852	-0.37716	Histidine kinase-, DNA gyrase B-, and HSP90-like ATPase	Probable ethylene response sensor 1 OS=Oryza sativa subsp. indica OX=39946 GN=ERS1 PE=2 SV=1	probable ethylene response sensor 1 [Chenopodium quinoa]
ETR	AUR62028548	ETR05	normal	up	normal	normal	0.367725	1.17603	0.401358	0.187979	Histidine kinase-, DNA gyrase B-, and HSP90-like ATPase	Ethylene receptor OS=Passiflora edulis OX=78168 GN=ETR1 PE=2 SV=1	ethylene receptor-like [Chenopodium quinoa]
ETR	AUR62033500	ETR06	normal	up	normal	normal	0.289264	1.59681	0.321649	0.216214	Histidine kinase-, DNA gyrase B-, and HSP90-like ATPase	Ethylene receptor OS=Passiflora edulis OX=78168 GN=ETR1 PE=2 SV=1	ethylene receptor-like [Chenopodium quinoa]
ETR	Chenopodium_quinoa_newGene_3812	ETR07	normal	down	normal	normal	-0.424963	-1.54136	-0.0989337	-0.597324	MULE transposase domain	Protein FAR1-RELATED SEQUENCE 5 OS=Arabidopsis thaliana OX=3702 GN=FRS5 PE=1 SV=1	protein FAR1-RELATED SEQUENCE 5-like [Chenopodium quinoa]
CTR1	AUR62008880	CTR1-01	normal	up	normal	normal	0.380707	2.49003	0.485787	0.789453	Protein tyrosine and serine/threonine kinase	Probable serine/threonine-protein kinase SIS8 OS=Arabidopsis thaliana OX=3702 GN=SIS8 PE=1 SV=1	uncharacterized protein LOC110728090 [Chenopodium quinoa]
CTR1	AUR62011256	CTR1-02	normal	up	normal	normal	0.690399	2.57881	0.477535	0.874482	Protein tyrosine and serine/threonine kinase	Serine/threonine-protein kinase CTR1 OS=Arabidopsis thaliana OX=3702 GN=CTR1 PE=1 SV=1	uncharacterized protein LOC110708075 isoform X1 [Chenopodium quinoa]
CTR1	AUR62031828	CTR1-03	normal	up	normal	normal	0.544337	1.78939	0.585264	0.574379	Protein tyrosine and serine/threonine kinase	Probable serine/threonine-protein kinase SIS8 OS=Arabidopsis thaliana OX=3702 GN=SIS8 PE=1 SV=1	uncharacterized protein LOC110731868 [Chenopodium quinoa]
CTR1	AUR62033580	CTR1-04	normal	up	normal	normal	0.168337	1.14332	0.704954	-0.149297	Ethylene-responsive protein kinase Le-CTR1	Serine/threonine-protein kinase CTR1 OS=Arabidopsis thaliana OX=3702 GN=CTR1 PE=1 SV=1	serine/threonine-protein kinase CTR1-like [Chenopodium quinoa]
CTR1	AUR62038349	CTR1-05	normal	up	normal	normal	0.390962	1.391	0.56414	0.0480729	Protein tyrosine and serine/threonine kinase	Probable serine/threonine-protein kinase SIS8 OS=Arabidopsis thaliana OX=3702 GN=SIS8 PE=1 SV=1	uncharacterized protein LOC110735099 isoform X1 [Chenopodium quinoa]
CTR1	AUR62041418	CTR1-06	normal	up	normal	normal	0.10307	1.06697	0.35965	-0.513099	Ethylene-responsive protein kinase Le-CTR1	Serine/threonine-protein kinase CTR1 OS=Arabidopsis thaliana OX=3702 GN=CTR1 PE=1 SV=1	serine/threonine-protein kinase CTR1-like [Chenopodium quinoa]
CTR1	AUR62041450	CTR1-07	normal	up	normal	normal	0.10307	1.06697	0.35965	-0.513099	Ethylene-responsive protein kinase Le-CTR1	Serine/threonine-protein kinase CTR1 OS=Arabidopsis thaliana OX=3702 GN=CTR1 PE=1 SV=1	serine/threonine-protein kinase CTR1-like [Chenopodium quinoa]
CTR1	AUR62013917	CTR1-08	normal	down	normal	down	-0.193758	-1.37887	-0.53339	-1.65452	bZIP transcription factor	bZIP transcription factor 27 OS=Arabidopsis thaliana OX=3702 GN=FDP PE=1 SV=1	bZIP transcription factor 27-like isoform X1 [Chenopodium quinoa]
CTR1	AUR62018275	CTR1-09	normal	down	normal	down	-0.650151	-2.18579	-0.878002	-2.03134	bZIP transcription factor	Protein FD OS=Arabidopsis thaliana OX=3702 GN=FD PE=1 SV=1	protein FD-like isoform X2 [Chenopodium quinoa]
CTR1	AUR62020955	CTR1-10	normal	down	normal	normal	0.192338	-1.14606	-0.120738	0.150205	bZIP transcription factor	ABSCISIC ACID-INSENSITIVE 5-like protein 2 OS=Arabidopsis thaliana OX=3702 GN=DPBF3 PE=1 SV=1	ABSCISIC ACID-INSENSITIVE 5-like protein 2 [Chenopodium quinoa]
SIMKK	AUR62009694	SIMKK01	--	up	--	--	--	3.08975	--	--	Protein of unknown function (DUF640)	Protein LIGHT-DEPENDENT SHORT HYPOCOTYLS 6 OS=Arabidopsis thaliana OX=3702 GN=LSH6 PE=1 SV=1	protein LIGHT-DEPENDENT SHORT HYPOCOTYLS 5-like [Chenopodium quinoa]
SIMKK	AUR62042772	SIMKK02	--	up	--	--	--	2.2184	--	--	Protein of unknown function (DUF640)	Protein LIGHT-DEPENDENT SHORT HYPOCOTYLS 10 OS=Arabidopsis thaliana OX=3702 GN=LSH10 PE=1 SV=1	protein LIGHT-DEPENDENT SHORT HYPOCOTYLS 10-like [Chenopodium quinoa]
SIMKK	AUR62011850	SIMKK03	normal	normal	normal	down	0.642446	-0.0671472	-0.628896	-1.44134	Protein of unknown function (DUF640)	Protein LIGHT-DEPENDENT SHORT HYPOCOTYLS 4 OS=Arabidopsis thaliana OX=3702 GN=LSH4 PE=1 SV=1	uncharacterized protein LOC110734339 [Chenopodium quinoa]
EIN2	AUR62022345	EIN2-01	normal	up	normal	normal	0.292935	1.06149	0.482357	-0.057907	Natural resistance-associated macrophage protein	Ethylene-insensitive protein 2 OS=Arabidopsis thaliana OX=3702 GN=EIN2 PE=1 SV=1	LOW QUALITY PROTEIN: ethylene-insensitive protein 2-like [Chenopodium quinoa]
EIN2	AUR62034361	EIN2-02	normal	up	normal	normal	0.392287	1.19109	0.711089	-0.118872	Natural resistance-associated macrophage protein	Ethylene-insensitive protein 2 OS=Arabidopsis thaliana OX=3702 GN=EIN2 PE=1 SV=1	ethylene-insensitive protein 2-like [Chenopodium quinoa]
EIN3	AUR62034106	EIN3-01	normal	up	normal	normal	0.51145	1.91923	0.693586	-0.0265791	Ethylene insensitive 3	Protein ETHYLENE INSENSITIVE 3 OS=Arabidopsis thaliana OX=3702 GN=EIN3 PE=1 SV=1	ETHYLENE INSENSITIVE 3-like 1 protein [Chenopodium quinoa]
EIN3	AUR62034108	EIN3-02	normal	up	normal	normal	0.276931	1.27853	0.471747	0.0535754	Ethylene insensitive 3	Protein ETHYLENE INSENSITIVE 3 OS=Arabidopsis thaliana OX=3702 GN=EIN3 PE=1 SV=1	ETHYLENE INSENSITIVE 3-like 1 protein [Chenopodium quinoa]
EIN3	AUR62041277	EIN3-03	normal	up	normal	normal	0.343959	1.29926	0.412648	0.263998	Ethylene insensitive 3	Protein ETHYLENE INSENSITIVE 3 OS=Arabidopsis thaliana OX=3702 GN=EIN3 PE=1 SV=1	ETHYLENE INSENSITIVE 3-like 1 protein [Chenopodium quinoa]
EBF1/2	AUR62011140	F-box01	up	up	up	up	3.10757	3.3124	1.80071	1.44227	Leucine Rich repeat	EIN3-binding F-box protein 1 OS=Arabidopsis thaliana OX=3702 GN=EBF1 PE=1 SV=1	EIN3-binding F-box protein 2-like [Chenopodium quinoa]
EBF1/2	AUR62012391	F-box02	normal	up	normal	normal	0.776524	1.45739	0.558027	0.0335433	Leucine Rich repeat	EIN3-binding F-box protein 1 OS=Arabidopsis thaliana OX=3702 GN=EBF1 PE=1 SV=1	EIN3-binding F-box protein 1-like [Chenopodium quinoa]
EBF1/2	AUR62013347	F-box03	up	up	up	up	2.35732	3.55651	1.25611	1.40342	Leucine Rich repeat	EIN3-binding F-box protein 1 OS=Arabidopsis thaliana OX=3702 GN=EBF1 PE=1 SV=1	EIN3-binding F-box protein 1-like [Chenopodium quinoa]
EBF1/2	AUR62031513	F-box04	normal	up	normal	normal	0.983757	1.52282	0.732689	-0.117464	Leucine Rich repeat	EIN3-binding F-box protein 1 OS=Arabidopsis thaliana OX=3702 GN=EBF1 PE=1 SV=1	EIN3-binding F-box protein 1-like [Chenopodium quinoa]
ERF1/2	AUR62002113	ERF01	normal	up	--	up	-0.553145	2.43607	--	1.81563	AP2 domain	Ethylene-responsive transcription factor ERF095 OS=Arabidopsis thaliana OX=3702 GN=ERF095 PE=1 SV=1	ethylene-responsive transcription factor ERF095-like [Chenopodium quinoa]
ERF1/2	AUR62028234	ERF02	up	up	--	up	1.27857	4.61	--	2.16775	AP2 domain	Ethylene-responsive transcription factor ERF095 OS=Arabidopsis thaliana OX=3702 GN=ERF095 PE=1 SV=1	ethylene-responsive transcription factor ERF095-like [Chenopodium quinoa]
ERF1/2	AUR62011878	ERF03	up	normal	normal	down	1.12704	0.227274	-0.0458463	-1.07762	AP2 domain	Ethylene-response factor C3 OS=Solanum lycopersicum OX=4081 GN=ERF.C.3 PE=2 SV=1	ethylene-responsive transcription factor 1B-like [Chenopodium quinoa]
ERF1/2	AUR62024721	ERF04	up	normal	normal	down	1.08922	0.0507224	-0.368428	-1.03921	AP2 domain	Ethylene-response factor C3 OS=Solanum lycopersicum OX=4081 GN=ERF.C.3 PE=2 SV=1	ethylene-responsive transcription factor 1B-like [Chenopodium quinoa]
JA
JAR1	AUR62022460	JAR1-01	normal	down	normal	down	-0.0540769	-2.16926	-0.339854	-1.30064	Protein of unknown function, DUF547	--	uncharacterized protein LOC110696596 isoform X1 [Chenopodium quinoa]
JAR1	AUR62040064	JAR1-02	normal	down	normal	normal	-0.846408	-2.0573	-0.560718	-0.996807	Protein of unknown function, DUF547	--	uncharacterized protein LOC110690109 [Chenopodium quinoa]
COI1	AUR62010874	COI1-01	normal	down	normal	normal	-0.586974	-1.43852	-0.191818	-0.360675	Transport inhibitor response 1 protein domain	Coronatine-insensitive protein 1 OS=Arabidopsis thaliana OX=3702 GN=COI1 PE=1 SV=1	coronatine-insensitive protein 1-like isoform X1 [Chenopodium quinoa]
COI1	AUR62012205	COI1-02	normal	down	normal	down	-0.272638	-2.25461	-0.437879	-1.64131	Transport inhibitor response 1 protein domain	Coronatine-insensitive protein 1 OS=Arabidopsis thaliana OX=3702 GN=COI1 PE=1 SV=1	coronatine-insensitive protein 1-like [Chenopodium quinoa]
COI1	AUR62021387	COI1-03	normal	down	normal	down	-0.268592	-1.83435	0.12632	-1.91422	Transport inhibitor response 1 protein domain	Coronatine-insensitive protein 1 OS=Arabidopsis thaliana OX=3702 GN=COI1 PE=1 SV=1	coronatine-insensitive protein 1-like [Chenopodium quinoa]
COI1	AUR62022838	COI1-04	normal	down	normal	down	-0.281118	-1.74675	-0.323368	-1.19336	F-box	Coronatine-insensitive protein 1 OS=Arabidopsis thaliana OX=3702 GN=COI1 PE=1 SV=1	coronatine-insensitive protein 1-like [Chenopodium quinoa]
JAZ	AUR62001446	TIFY01	normal	up	normal	normal	0.586338	4.72023	0.735718	0.615953	tify domain	Protein TIFY 10A OS=Arabidopsis thaliana OX=3702 GN=TIFY10A PE=1 SV=1	protein TIFY 10A-like [Chenopodium quinoa]
JAZ	AUR62005696	TIFY02	normal	up	normal	normal	0.720223	1.65849	0.321251	-0.0245275	Jas motif	Protein TIFY 9 OS=Arabidopsis thaliana OX=3702 GN=TIFY9 PE=1 SV=1	protein TIFY 9-like isoform X2 [Chenopodium quinoa]
JAZ	AUR62009919	TIFY03	normal	up	normal	normal	0.935067	4.59383	1.00285	1.21267	tify domain	Protein TIFY 10A OS=Arabidopsis thaliana OX=3702 GN=TIFY10A PE=1 SV=1	protein TIFY 10A-like [Chenopodium quinoa]
JAZ	AUR62025291	TIFY04	normal	up	normal	normal	0.0956449	1.3049	0.460134	0.434711	tify domain	Protein TIFY 10A OS=Arabidopsis thaliana OX=3702 GN=TIFY10A PE=1 SV=1	protein TIFY 10b-like [Chenopodium quinoa]
JAZ	AUR62028298	TIFY05	normal	up	normal	normal	0.341972	2.16616	0.737852	0.772452	tify domain	Protein TIFY 10A OS=Arabidopsis thaliana OX=3702 GN=TIFY10A PE=1 SV=1	protein TIFY 10B-like [Chenopodium quinoa]
JAZ	AUR62028862	TIFY06	normal	up	normal	normal	0.34175	1.81573	0.410069	0.817824	tify domain	Protein TIFY 9 OS=Arabidopsis thaliana OX=3702 GN=TIFY9 PE=1 SV=1	protein TIFY 9-like isoform X2 [Chenopodium quinoa]
JAZ	Chenopodium_quinoa_newGene_17214	TIFY07	down	up	normal	normal	-1.6914	4.65206	0.489821	1.83639	tify domain	Protein TIFY 5A OS=Arabidopsis thaliana OX=3702 GN=TIFY5A PE=1 SV=1	protein TIFY 5A-like isoform X1 [Chenopodium quinoa]
JAZ	AUR62024850	TIFY08	--	down	--	down	--	-3.84404	--	-1.57464	tify domain	Protein TIFY 8 OS=Arabidopsis thaliana OX=3702 GN=TIFY8 PE=1 SV=1	protein TIFY 8-like [Chenopodium quinoa]
MYC2	AUR62007294	BHLH08	normal	up	normal	normal	-0.581179	2.40819	0.74167	0.709716	bHLH-MYC and R2R3-MYB transcription factors N-terminal	Transcription factor MYC2 OS=Solanum lycopersicum OX=4081 GN=MYC2 PE=1 SV=1	transcription factor MYC2-like [Chenopodium quinoa]
MYC2	AUR62018713	BHLH09	normal	up	normal	normal	-0.411468	1.50865	0.410812	0.28227	bHLH-MYC and R2R3-MYB transcription factors N-terminal	Transcription factor MYC2 OS=Solanum lycopersicum OX=4081 GN=MYC2 PE=1 SV=1	LOW QUALITY PROTEIN: transcription factor MYC2-like [Chenopodium quinoa]
MYC2	AUR62022659	BHLH10	normal	up	normal	normal	0.712804	1.13894	0.141119	-0.393415	bHLH-MYC and R2R3-MYB transcription factors N-terminal	Transcription factor bHLH14 OS=Arabidopsis thaliana OX=3702 GN=BHLH14 PE=1 SV=1	transcription factor MYC2-like [Chenopodium quinoa]
MYC2	AUR62027481	BHLH11	normal	up	normal	normal	0.977397	3.03805	0.965782	0.6176	Helix-loop-helix DNA-binding domain	Transcription factor bHLH35 OS=Arabidopsis thaliana OX=3702 GN=BHLH35 PE=2 SV=1	uncharacterized protein LOC110716850 [Chenopodium quinoa]
MYC2	AUR62033996	BHLH12	normal	up	normal	normal	-0.754011	1.52231	-0.240984	1.18511	Helix-loop-helix DNA-binding domain	Transcription factor bHLH35 OS=Arabidopsis thaliana OX=3702 GN=BHLH35 PE=2 SV=1	transcription factor bHLH35-like [Chenopodium quinoa]
MYC2	AUR62004545	BHLH13	normal	down	normal	down	-0.315727	-2.27819	0.79101	-2.18853	bHLH-MYC and R2R3-MYB transcription factors N-terminal	Transcription factor bHLH14 OS=Arabidopsis thaliana OX=3702 GN=BHLH14 PE=1 SV=1	transcription factor bHLH14-like [Chenopodium quinoa]
MYC2	AUR62007060	BHLH14	normal	normal	normal	down	0.0201328	0.380718	-0.0973009	-1.04113	bHLH-MYC and R2R3-MYB transcription factors N-terminal	Transcription factor bHLH14 OS=Arabidopsis thaliana OX=3702 GN=BHLH14 PE=1 SV=1	transcription factor bHLH14-like [Chenopodium quinoa]
SA
TGA	AUR62003749	TGA01	normal	up	normal	normal	0.556807	1.26517	0.372107	0.46853	Seed dormancy control	Transcription factor TGA4 OS=Arabidopsis thaliana OX=3702 GN=TGA4 PE=1 SV=2	transcription factor TGA4-like isoform X1 [Chenopodium quinoa]
TGA	AUR62022327	TGA02	normal	up	normal	normal	0.760362	1.13881	0.731546	0.677084	Seed dormancy control	Transcription factor TGA7 OS=Arabidopsis thaliana OX=3702 GN=TGA7 PE=1 SV=1	transcription factor TGA7-like [Chenopodium quinoa]
TGA	AUR62030488	TGA03	normal	up	normal	up	0.840864	2.95286	0.441048	1.87541	Seed dormancy control	--	transcription factor TGA9-like [Chenopodium quinoa]
TGA	AUR62030804	TGA04	--	up	--	up	--	4.76061	--	1.38969	Seed dormancy control	--	transcription factor TGA9-like [Chenopodium quinoa]
TGA	AUR62031746	TGA05	normal	up	normal	normal	0.0966951	1.193	0.355441	0.643906	Seed dormancy control	Transcription factor TGAL1 OS=Oryza sativa subsp. japonica OX=39947 GN=TGAL1 PE=1 SV=2	transcription factor TGA2-like isoform X1 [Chenopodium quinoa]
TGA	AUR62043508	TGA06	up	up	normal	up	2.06141	2.81666	0.776765	1.32887	Seed dormancy control	Transcription factor TGA4 OS=Arabidopsis thaliana OX=3702 GN=TGA4 PE=1 SV=2	transcription factor TGA7-like [Chenopodium quinoa]
TGA	AUR62030316	TGA07	normal	down	normal	normal	-0.931936	-1.92829	-1.03111	-0.623557	Seed dormancy control	TGACG-sequence-specific DNA-binding protein TGA-2.1 OS=Nicotiana tabacum OX=4097 GN=TGA21 PE=1 SV=1	transcription factor TGA2.3-like [Chenopodium quinoa]
PR-1	AUR62027038	PR1-01	down	normal	normal	normal	-2.81252	1.8896	-0.849828	-0.10764	Cysteine-rich secretory protein family	Pathogenesis-related protein PRB1-3 OS=Hordeum vulgare OX=4513 PE=2 SV=1	hypothetical protein Ahy_B10g100824 [Arachis hypogaea]
PR-1	AUR62027039	PR1-02	down	up	normal	normal	-4.4194	3.08206	-0.567511	0.272483	Cysteine-rich secretory protein family	Pathogenesis-related protein 1A OS=Nicotiana tabacum OX=4097 PE=1 SV=1	pathogenesis-related protein 1A-like [Chenopodium quinoa]
PR-1	AUR62030884	PR1-03	down	up	normal	normal	-2.5672	2.07462	-0.385339	-0.324536	Cysteine-rich secretory protein family	Pathogenesis-related protein PRB1-3 OS=Hordeum vulgare OX=4513 PE=2 SV=1	pathogenesis-related protein PRB1-3-like [Chenopodium quinoa]
PR-1	AUR62030885	PR1-04	down	normal	down	down	-1.92591	0.61535	-1.59728	-1.32259	Cysteine-rich secretory protein family	Pathogenesis-related protein PR-1 type OS=Sambucus nigra OX=4202 PE=2 SV=1	pathogenesis-related protein PR-1 type-like [Chenopodium quinoa]
PR-1	AUR62030886	PR1-05	down	up	normal	normal	-2.13691	2.73848	-1.30393	0.192404	Cysteine-rich secretory protein family	Pathogenesis-related protein PRB1-3 OS=Hordeum vulgare OX=4513 PE=2 SV=1	pathogenesis-related protein PRB1-3-like [Chenopodium quinoa]
PR-1	AUR62030888	PR1-06	--	up	--	--	--	4.29474	--	--	Cysteine-rich secretory protein family	Pathogenesis-related protein 1B OS=Nicotiana tabacum OX=4097 PE=2 SV=1	pathogenesis-related protein 1B-like [Chenopodium quinoa]
PR-1	AUR62039993	PR1-07	--	down	normal	normal	Cysteine-rich secretory protein family	Pathogenesis-related protein PR-1 OS=Medicago truncatula OX=3880 GN=PR-1 PE=2 SV=1	pathogenesis-related protein PRB1-3-like [Chenopodium quinoa]

## Sheet: phenylpropanoid biosynthsis 
Table S2 phenylpropanoid biosynthsis involves genes
	#ID	Name	HZ1-C3-vs-T3	HZ1-C9-vs-T9	L1-C3-vs-T3	L1-C9-vs-T9	Pfam_annotation	Swiss_Prot_annotation	NR_annotation
3.22.21	AUR62000070	GH01	--	--	1.13037	1.62977	Glycosyl hydrolase family 1	Beta-glucosidase 13 OS=Oryza sativa subsp. japonica OX=39947 GN=BGLU13 PE=2 SV=2	beta-glucosidase 13-like [Chenopodium quinoa]
3.22.21	AUR62001589	GH02	1.61779	0.923527	0.22002	0.732485	Glycosyl hydrolase family 3 N terminal domain	Beta-xylosidase/alpha-L-arabinofuranosidase 2 OS=Medicago sativa subsp. varia OX=36902 GN=Xyl2 PE=2 SV=1	uncharacterized protein LOC110688204 [Chenopodium quinoa]
3.22.21	AUR62003117	GH03	-0.612699	-1.16176	-0.760723	-0.254633	Glycosyl hydrolase family 1	Beta-glucosidase 6 OS=Oryza sativa subsp. japonica OX=39947 GN=BGLU6 PE=1 SV=1	beta-glucosidase 6-like [Chenopodium quinoa]
3.22.21	AUR62004018	GH04	0.720477	1.74015	0.272618	0.386968	Glycosyl hydrolase family 3 N terminal domain	Beta-D-xylosidase 1 OS=Arabidopsis thaliana OX=3702 GN=BXL1 PE=1 SV=1	uncharacterized protein LOC110682447 [Chenopodium quinoa]
3.22.21	AUR62006612	GH05	0.569009	1.12271	0.781817	0.457285	Glycosyl hydrolase family 1	Beta-glucosidase 42 OS=Arabidopsis thaliana OX=3702 GN=BGLU42 PE=2 SV=1	beta-glucosidase 42-like [Chenopodium quinoa]
3.22.21	AUR62007526	GH06	--	2.12185	-0.336114	--	Glycosyl hydrolase family 3 N terminal domain	Probable beta-D-xylosidase 5 OS=Arabidopsis thaliana OX=3702 GN=BXL5 PE=2 SV=2	uncharacterized protein LOC110685748 [Chenopodium quinoa]
3.22.21	AUR62007527	GH07	0.33726	1.23022	-0.0462379	0.557478	Glycosyl hydrolase family 3 N terminal domain	Beta-D-xylosidase 1 OS=Arabidopsis thaliana OX=3702 GN=BXL1 PE=1 SV=1	uncharacterized protein LOC110685747 [Chenopodium quinoa]
3.22.21	AUR62009820	GH08	0.214023	-0.941843	0.498254	-1.01566	Glycosyl hydrolase family 1	Beta-glucosidase 44 OS=Arabidopsis thaliana OX=3702 GN=BGLU44 PE=2 SV=1	beta-glucosidase 44-like [Chenopodium quinoa]
3.22.21	AUR62012668	GH09	-0.441907	-1.21483	-0.714989	-0.832302	Glycosyl hydrolase family 1	Beta-glucosidase 46 OS=Arabidopsis thaliana OX=3702 GN=BGLU46 PE=1 SV=2	beta-glucosidase 46-like isoform X2 [Chenopodium quinoa]
3.22.21	AUR62014289	GH10	-0.454581	-1.95639	0.117219	-1.31126	Glycosyl hydrolase family 3 C-terminal domain	Beta-xylosidase/alpha-L-arabinofuranosidase 2 OS=Medicago sativa subsp. varia OX=36902 GN=Xyl2 PE=2 SV=1	uncharacterized protein LOC110724576 [Chenopodium quinoa]
3.22.21	AUR62014561	GH11	0.157917	6.61232	--	--	--	--	uncharacterized protein LOC110720816 [Chenopodium quinoa]
3.22.21	AUR62017377	GH12	-1.22084	-3.31297	-0.84244	--	--	--	uncharacterized protein LOC110692127 [Chenopodium quinoa]
3.22.21	AUR62019244	GH13	1.07111	-1.08421	0.202887	-0.0254263	Glycosyl hydrolase family 1	Beta-glucosidase 12 OS=Oryza sativa subsp. indica OX=39946 GN=BGLU12 PE=3 SV=1	beta-glucosidase 13-like [Chenopodium quinoa]
3.22.21	AUR62020191	GH14	0.382614	1.04046	-0.0291283	1.03139	Glycosyl hydrolase family 3 N terminal domain	Beta-xylosidase/alpha-L-arabinofuranosidase 2 OS=Medicago sativa subsp. varia OX=36902 GN=Xyl2 PE=2 SV=1	uncharacterized protein LOC110683530 [Chenopodium quinoa]
3.22.21	AUR62024339	GH15	0.252657	1.86513	-0.933792	--	Leucine rich repeat	Polygalacturonase inhibitor OS=Pyrus communis OX=23211 GN=PGIP PE=1 SV=1	polygalacturonase inhibitor-like [Chenopodium quinoa]
3.22.21	AUR62024340	GH16	-0.197738	1.6671	-0.817968	-0.261384	Leucine rich repeat N-terminal domain	Polygalacturonase inhibitor 1 OS=Arabidopsis thaliana OX=3702 GN=PGIP1 PE=1 SV=1	polygalacturonase inhibitor 1-like [Chenopodium quinoa]
3.22.21	AUR62029270	GH17	1.4094	2.91905	-0.102917	1.73964	Glycosyl hydrolase family 1	Putative beta-glucosidase 41 OS=Arabidopsis thaliana OX=3702 GN=BGLU41 PE=3 SV=2	putative beta-glucosidase 41 [Chenopodium quinoa]
3.22.21	AUR62029647	GH18	0.228798	0.457259	0.266829	-1.59398	Glycosyl hydrolase family 1	Beta-glucosidase 12 OS=Oryza sativa subsp. indica OX=39946 GN=BGLU12 PE=3 SV=1	beta-glucosidase 13-like [Chenopodium quinoa]
3.22.21	AUR62033126	GH19	0.310359	0.199694	0.450407	1.45646	Glycosyl hydrolase family 1	Beta-glucosidase 31 OS=Oryza sativa subsp. japonica OX=39947 GN=BGLU31 PE=2 SV=1	cyanidin 3-O-glucoside 5-O-glucosyltransferase (acyl-glucose)-like [Chenopodium quinoa]
3.22.21	AUR62033128	GH20	0.460389	1.45523	0.885765	1.18246	Glycosyl hydrolase family 1	Beta-glucosidase 32 OS=Oryza sativa subsp. japonica OX=39947 GN=BGLU32 PE=2 SV=2	cyanidin 3-O-glucoside 5-O-glucosyltransferase (acyl-glucose)-like [Chenopodium quinoa]
3.22.21	AUR62033130	GH21	0.492398	2.33896	0.857059	1.19509	Glycosyl hydrolase family 1	Beta-glucosidase 11 OS=Arabidopsis thaliana OX=3702 GN=BGLU11 PE=2 SV=2	beta-glucosidase 31-like [Chenopodium quinoa]
3.22.21	AUR62033979	GH22	-0.195738	-1.25341	0.168005	0.47738	Glycosyl hydrolase family 1	Beta-glucosidase 12 OS=Oryza sativa subsp. indica OX=39946 GN=BGLU12 PE=3 SV=1	beta-glucosidase 24-like [Chenopodium quinoa]
3.22.21	AUR62034146	GH23	-0.620482	-1.70402	-0.47665	-1.18833	Glycosyl hydrolase family 3 C-terminal domain	Beta-xylosidase/alpha-L-arabinofuranosidase 2 OS=Medicago sativa subsp. varia OX=36902 GN=Xyl2 PE=2 SV=1	uncharacterized protein LOC110737394 [Chenopodium quinoa]
3.22.21	AUR62034565	GH24	-0.0226021	3.39495	--	--	Glycosyl hydrolase family 1	Beta-glucosidase 11 OS=Arabidopsis thaliana OX=3702 GN=BGLU11 PE=2 SV=2	beta-glucosidase 11-like [Chenopodium quinoa]
3.22.21	AUR62036281	GH25	-0.611177	-1.19172	-1.08852	0.0706286	Glycosyl hydrolase family 3 N terminal domain	Beta-xylosidase/alpha-L-arabinofuranosidase 2 OS=Medicago sativa subsp. varia OX=36902 GN=Xyl2 PE=2 SV=1	uncharacterized protein LOC110688825 [Chenopodium quinoa]
3.22.21	AUR62041147	GH26	0.433391	1.32817	0.137807	1.90035	Glycosyl hydrolase family 1	Putative beta-glucosidase 41 OS=Arabidopsis thaliana OX=3702 GN=BGLU41 PE=3 SV=2	putative beta-glucosidase 41 isoform X1 [Chenopodium quinoa]
3.22.21	AUR62041464	GH27	2.00164	5.03646	1.65066	1.98403	Glycosyl hydrolase family 1	Beta-glucosidase 12 OS=Oryza sativa subsp. indica OX=39946 GN=BGLU12 PE=3 SV=1	beta-glucosidase 24-like [Chenopodium quinoa]
3.22.21	Chenopodium_quinoa_newGene_13452	GH28	-0.610435	6.81373	--	-4.9734	--	--	uncharacterized protein LOC110728855 [Chenopodium quinoa]
4.3.1.24	AUR62014631	D-protein		-3.98672	-0.246166		Dirigent-like protein	Dirigent protein 19 OS=Arabidopsis thaliana OX=3702 GN=DIR19 PE=2 SV=1	dirigent protein 19-like [Chenopodium quinoa]
6.2.1.12	AUR62033205	4-C-C-ligase-01	1.59789	1.4597	1.7398	0.918871	AMP-binding enzyme	4-coumarate--CoA ligase 1 OS=Solanum tuberosum OX=4113 GN=4CL1 PE=3 SV=1	4-coumarate--CoA ligase 1-like [Chenopodium quinoa]
6.2.1.12	AUR62040310	4-C-C-ligase-02	1.11994	0.748486	1.075	0.757649	AMP-binding enzyme	4-coumarate--CoA ligase 1 OS=Solanum tuberosum OX=4113 GN=4CL1 PE=3 SV=1	4-coumarate--CoA ligase 1-like [Chenopodium quinoa]
6.2.1.12	AUR62044152	4-C-C-ligase-03	1.47247	0.967126	1.37751	1.33131	AMP-binding enzyme	4-coumarate--CoA ligase 1 OS=Solanum tuberosum OX=4113 GN=4CL1 PE=3 SV=1	4-coumarate--CoA ligase 1-like [Chenopodium quinoa]
6.2.1.12	AUR62044562	4-C-C-ligase-04	1.39541	0.493679	0.325696	1.55515	AMP-binding enzyme	4-coumarate--CoA ligase 1 OS=Solanum tuberosum OX=4113 GN=4CL1 PE=3 SV=1	4-coumarate--CoA ligase 1-like [Chenopodium quinoa]
6.2.1.12	AUR62044567	4-C-C-ligase-05	2.09747	2.54211	2.11647	1.62571	AMP-binding enzyme	4-coumarate--CoA ligase 1 OS=Nicotiana tabacum OX=4097 GN=4CL1 PE=2 SV=1	4-coumarate--CoA ligase 1-like [Chenopodium quinoa]
6.2.1.12	AUR62014933	4-C-C-ligase-06	0.285335	1.61075	0.42883	0.37291	AMP-binding enzyme	4-coumarate--CoA ligase-like 7 OS=Arabidopsis thaliana OX=3702 GN=4CLL7 PE=1 SV=1	4-coumarate--CoA ligase-like 7 isoform X1 [Chenopodium quinoa]
6.2.1.12	AUR62040777	4-C-C-ligase-07	--	-1.35585	-0.304715	-0.492154	hAT family C-terminal dimerisation region	Putative AC transposase OS=Zea mays OX=4577 PE=2 SV=2	uncharacterized protein LOC110697004 [Chenopodium quinoa]
1.2.1.44	AUR62000140	C-C- reductase-01	-0.72423	1.16013	-0.967592	-0.399632	NAD dependent epimerase/dehydratase family	Phenylacetaldehyde reductase OS=Rosa hybrid cultivar OX=128735 GN=PAR PE=1 SV=1	cinnamoyl-CoA reductase 1-like [Chenopodium quinoa]
1.2.1.44	AUR62001893	C-C- reductase-02	-0.234404	-1.04835	-0.189681	-0.739234	NAD dependent epimerase/dehydratase family	Cinnamoyl-CoA reductase 1 OS=Arabidopsis thaliana OX=3702 GN=CCR1 PE=1 SV=1	cinnamoyl-CoA reductase 1-like [Chenopodium quinoa]
1.2.1.44	AUR62009689	C-C- reductase-03	-0.0641867	-1.11276	-0.123825	-0.88299	NAD dependent epimerase/dehydratase family	Phenylacetaldehyde reductase OS=Rosa hybrid cultivar OX=128735 GN=PAR PE=1 SV=1	cinnamoyl-CoA reductase 2-like [Chenopodium quinoa]
1.2.1.44	AUR62026993	C-C- reductase-04	0.786813	1.24358	0.996586	1.29444	NAD dependent epimerase/dehydratase family	Cinnamoyl-CoA reductase 1 OS=Arabidopsis thaliana OX=3702 GN=CCR1 PE=1 SV=1	cinnamoyl-CoA reductase 1-like [Chenopodium quinoa]
1.2.1.44	AUR62028200	C-C- reductase-05	1.0637	4.83605	0.753746	4.5067	3-beta hydroxysteroid dehydrogenase/isomerase family	Phenylacetaldehyde reductase OS=Rosa hybrid cultivar OX=128735 GN=PAR PE=1 SV=1	cinnamoyl-CoA reductase 2-like [Chenopodium quinoa]
1.2.1.44	AUR62030833	C-C- reductase-06	1.15403	1.12269	1.27283	0.633404	NAD dependent epimerase/dehydratase family	Cinnamoyl-CoA reductase 1 OS=Arabidopsis thaliana OX=3702 GN=CCR1 PE=1 SV=1	cinnamoyl-CoA reductase 1-like [Chenopodium quinoa]
1.2.1.44	AUR62018699	C-C- reductase-07	0.0916687	1.83536	0.133096	1.92869	NAD dependent epimerase/dehydratase family	Cinnamoyl-CoA reductase-like SNL6 OS=Oryza sativa subsp. japonica OX=39947 GN=SNL6 PE=3 SV=1	cinnamoyl-CoA reductase-like SNL6 isoform X1 [Chenopodium quinoa]
1.2.1.44	AUR62002083	C-C- reductase-08	1.55964	3.9922	1.22299	3.95582	3-beta hydroxysteroid dehydrogenase/isomerase family	Phenylacetaldehyde reductase OS=Rosa hybrid cultivar OX=128735 GN=PAR PE=1 SV=1	cinnamoyl-CoA reductase 2-like [Chenopodium quinoa]
1.2.1.44	AUR62005189	C-C- reductase-09	0.0324559	0.888512	-0.0726667	-1.66864	3-beta hydroxysteroid dehydrogenase/isomerase family	Phenylacetaldehyde reductase OS=Rosa hybrid cultivar OX=128735 GN=PAR PE=1 SV=1	cinnamoyl-CoA reductase 1-like [Chenopodium quinoa]
1.2.1.44	AUR62019321	C-C- reductase-10	-0.645505	4.68593	-0.234303	1.64015	NAD dependent epimerase/dehydratase family	Phenylacetaldehyde reductase OS=Rosa hybrid cultivar OX=128735 GN=PAR PE=1 SV=1	uncharacterized protein LOC110696170 [Chenopodium quinoa]
1.2.1.44	AUR62036456	C-C- reductase-11	--	8.10034	--	4.35062	NAD dependent epimerase/dehydratase family	Phenylacetaldehyde reductase OS=Rosa hybrid cultivar OX=128735 GN=PAR PE=1 SV=1	tetraketide alpha-pyrone reductase 1-like [Chenopodium quinoa]
1.2.1.44	AUR62002878	T-A-reductase-01	-0.684871	-0.394752	-1.24244	-0.72117	NAD dependent epimerase/dehydratase family	Tetraketide alpha-pyrone reductase 2 OS=Arabidopsis thaliana OX=3702 GN=TKPR2 PE=1 SV=1	tetraketide alpha-pyrone reductase 2-like isoform X1 [Chenopodium quinoa]
1.2.1.44	AUR62007855	T-A-reductase-02	-0.0842985	-1.76088	-0.924861	-0.307808	--	Tetraketide alpha-pyrone reductase 2 OS=Arabidopsis thaliana OX=3702 GN=TKPR2 PE=1 SV=1	hypothetical protein SOVF_141130 [Spinacia oleracea]
1.2.1.44	AUR62012129	ATPase-01	-0.559216	-1.6006	-0.415091	-1.18403	ATPase family associated with various cellular activities (AAA)	Ribulose bisphosphate carboxylase/oxygenase activase, chloroplastic OS=Spinacia oleracea OX=3562 PE=1 SV=2	ribulose bisphosphate carboxylase/oxygenase activase, chloroplastic-like isoform X1 [Chenopodium quinoa]
1.2.1.44	AUR62040707	ATPase-02	-0.408916	-1.50097	-0.353403	-1.14726	ATPase family associated with various cellular activities (AAA)	Ribulose bisphosphate carboxylase/oxygenase activase, chloroplastic OS=Spinacia oleracea OX=3562 PE=1 SV=2	ribulose bisphosphate carboxylase/oxygenase activase, chloroplastic isoform X1 [Chenopodium quinoa]
1.2.1.44	Chenopodium_quinoa_newGene_9226	Un-protein	-0.0427838	-2.04507	--	0.442127	gag-polypeptide of LTR copia-type	Retrovirus-related Pol polyprotein from transposon RE1 OS=Arabidopsis thaliana OX=3702 GN=RE1 PE=2 SV=1	uncharacterized protein LOC110691642 [Chenopodium quinoa]
1.14.1491	AUR62020713	P450-01	1.99728	3.29592	1.86568	1.72493	Cytochrome P450	Cytochrome P450 CYP73A100 OS=Panax ginseng OX=4054 PE=2 SV=1	cytochrome P450 CYP73A100-like [Chenopodium quinoa]
1.1.1.195	AUR62003633	GroES-01	1.20174	-0.947044	0.9753	-0.828021	Alcohol dehydrogenase GroES-like domain	Probable mannitol dehydrogenase OS=Medicago sativa OX=3879 GN=CAD1 PE=1 SV=1	probable mannitol dehydrogenase [Chenopodium quinoa]
1.1.1.195	AUR62039075	GroES-02	0.985193	1.50465	0.865017	0.92483	Alcohol dehydrogenase GroES-like domain	Probable cinnamyl alcohol dehydrogenase 1 OS=Aralia cordata OX=29746 GN=CAD1 PE=2 SV=1	probable cinnamyl alcohol dehydrogenase [Chenopodium quinoa]
1.1.1.195	AUR62010312	GroES-03	0.799178	1.25645	0.831169	0.896976	Alcohol dehydrogenase GroES-like domain	Probable cinnamyl alcohol dehydrogenase 1 OS=Aralia cordata OX=29746 GN=CAD1 PE=2 SV=1	probable cinnamyl alcohol dehydrogenase [Chenopodium quinoa]
1.1.1.195	AUR62013502	GroES-04	--	6.77035	--	--	Alcohol dehydrogenase GroES-like domain	Probable cinnamyl alcohol dehydrogenase 1 OS=Arabidopsis thaliana OX=3702 GN=CAD1 PE=2 SV=1	probable cinnamyl alcohol dehydrogenase 1 [Chenopodium quinoa]
1.1.1.195	AUR62017942	GroES-05	1.48404	0.876901	1.39278	0.023423	Alcohol dehydrogenase GroES-like domain	Probable mannitol dehydrogenase OS=Medicago sativa OX=3879 GN=CAD1 PE=1 SV=1	probable mannitol dehydrogenase [Chenopodium quinoa]
1.1.1.195	AUR62018276	GroES-06	-1.05435	-1.30319	-0.467097	-0.245956	Alcohol dehydrogenase GroES-like domain	Probable cinnamyl alcohol dehydrogenase 6 OS=Oryza sativa subsp. japonica OX=39947 GN=CAD6 PE=2 SV=2	probable cinnamyl alcohol dehydrogenase 6 isoform X1 [Chenopodium quinoa]
1.1.1.195	AUR62026770	GroES-07	-0.466656	3.30193	-0.356747	0.571044	Alcohol dehydrogenase GroES-like domain	Probable cinnamyl alcohol dehydrogenase 1 OS=Arabidopsis thaliana OX=3702 GN=CAD1 PE=2 SV=1	probable cinnamyl alcohol dehydrogenase 1 [Chenopodium quinoa]
1.1.1.195	AUR62026771	GroES-08	-0.315272	2.09537	0.0842697	-0.453531	Alcohol dehydrogenase GroES-like domain	Probable cinnamyl alcohol dehydrogenase 1 OS=Arabidopsis thaliana OX=3702 GN=CAD1 PE=2 SV=1	probable cinnamyl alcohol dehydrogenase 1 [Chenopodium quinoa]
1.1.1.195	AUR62026773	GroES-09	-0.453332	2.25029	0.319634	-0.554332	Alcohol dehydrogenase GroES-like domain	Probable cinnamyl alcohol dehydrogenase 1 OS=Arabidopsis thaliana OX=3702 GN=CAD1 PE=2 SV=1	probable cinnamyl alcohol dehydrogenase 1 [Chenopodium quinoa]
1.1.1.195	AUR62022020	R-oxidase	0.352109	-1.98979	0.133815	--	Late embryogenesis abundant protein	Reticuline oxidase OS=Papaver somniferum OX=3469 GN=BBE1 PE=2 SV=1	reticuline oxidase-like [Chenopodium quinoa]
1.1.1.195	AUR62010087	B-B-enzyme-01	-0.27625	-1.16474	-0.384126	-0.307919	Berberine and berberine like	Berberine bridge enzyme-like 13 OS=Arabidopsis thaliana OX=3702 GN=At1g30760 PE=1 SV=1	berberine bridge enzyme-like 13 [Chenopodium quinoa]
1.1.1.195	AUR62026742	B-B-enzyme-02	0.426598	3.69039	0.378757	0.832331	Berberine and berberine like	Berberine bridge enzyme-like 2 OS=Arabidopsis thaliana OX=3702 GN=At1g11770 PE=2 SV=1	berberine bridge enzyme-like 19 [Chenopodium quinoa]
1.1.1.195	AUR62013538	B-B-enzyme-03	1.42928	2.42191	0.664996	1.34728	Berberine and berberine like	Berberine bridge enzyme-like 14 OS=Arabidopsis thaliana OX=3702 GN=At1g34575 PE=3 SV=1	berberine bridge enzyme-like 21 [Chenopodium quinoa]
1.1.1.195	AUR62026743	B-B-enzyme-04	0.857882	2.66385	0.683307	0.581236	Berberine and berberine like	Berberine bridge enzyme-like 8 OS=Arabidopsis thaliana OX=3702 GN=At1g30700 PE=2 SV=1	berberine bridge enzyme-like 21 [Chenopodium quinoa]
1.1.1.195	AUR62001439	B-B-enzyme-05	0.21471	1.27	0.6611	0.392847	2OG-Fe(II) oxygenase superfamily	Berberine bridge enzyme-like 8 OS=Arabidopsis thaliana OX=3702 GN=At1g30700 PE=2 SV=1	berberine bridge enzyme-like 8 [Chenopodium quinoa]
1.1.1.195	AUR62027332	B-B-enzyme-06	-0.627461	-1.7344	-0.347804	-0.816831	FAD binding domain	Berberine bridge enzyme-like 15 OS=Arabidopsis thaliana OX=3702 GN=MEE23 PE=1 SV=1	berberine bridge enzyme-like 15 [Chenopodium quinoa]
1.1.1.195	AUR62034494	B-B-enzyme-07	0.256498	4.95093	--	2.02542	FAD binding domain	Berberine bridge enzyme-like 8 OS=Arabidopsis thaliana OX=3702 GN=At1g30700 PE=2 SV=1	berberine bridge enzyme-like 8 [Chenopodium quinoa]
1.1.1.195	AUR62035477	B-B-enzyme-08	1.04333	8.57719	--	1.63356	FAD binding domain	Berberine bridge enzyme-like 8 OS=Arabidopsis thaliana OX=3702 GN=At1g30700 PE=2 SV=1	berberine bridge enzyme-like 8 [Chenopodium quinoa]
1.11.1.7	AUR62000608	POD01	0.295596	1.72552	-0.742313	0.551291	Peroxidase	Peroxidase 47 OS=Arabidopsis thaliana OX=3702 GN=PER47 PE=2 SV=2	peroxidase 47-like [Chenopodium quinoa]
1.11.1.7	AUR62002570	TSA01	0.844032	2.31173	0.859948	0.354841	AhpC/TSA family	1-Cys peroxiredoxin OS=Medicago truncatula OX=3880 PE=2 SV=1	1-Cys peroxiredoxin-like [Chenopodium quinoa]
1.11.1.7	AUR62002929	POD02	-0.163578	3.42881	-1.63776	2.55826	Peroxidase	Peroxidase 57 OS=Arabidopsis thaliana OX=3702 GN=PER57 PE=1 SV=1	peroxidase 57-like [Chenopodium quinoa]
1.11.1.7	AUR62003019	POD03	--	1.3635	-0.632156	1.1154	Peroxidase	Peroxidase 11 OS=Arabidopsis thaliana OX=3702 GN=PER11 PE=1 SV=1	peroxidase 11-like [Chenopodium quinoa]
1.11.1.7	AUR62003253	POD04	0.314021	1.6849	0.454227	-0.317332	Peroxidase	Peroxidase 17 OS=Arabidopsis thaliana OX=3702 GN=PER17 PE=2 SV=1	peroxidase 17-like [Chenopodium quinoa]
1.11.1.7	AUR62003315	B3-01	-0.774017	1.37498	-0.385433	0.264166	B3 DNA binding domain	Retrovirus-related Pol polyprotein from transposon TNT 1-94 OS=Nicotiana tabacum OX=4097 PE=2 SV=1	B3 domain-containing protein REM16-like [Chenopodium quinoa]
1.11.1.7	AUR62003451	WARK-L8	-1.03231	8.12945	--	1.01564	Wall-associated receptor kinase galacturonan-binding	Wall-associated receptor kinase-like 8 OS=Arabidopsis thaliana OX=3702 GN=WAKL8 PE=2 SV=1	wall-associated receptor kinase-like 8 [Chenopodium quinoa]
1.11.1.7	AUR62003855	TP131-L	-0.181741	-1.20781	-0.0981921	-0.341687	Transmembrane protein 131-like	--	uncharacterized protein LOC110682278 [Chenopodium quinoa]
1.11.1.7	AUR62003984	POD05	-0.0366524	1.50691	-0.0714798	-0.582609	Peroxidase	Peroxidase 50 OS=Arabidopsis thaliana OX=3702 GN=PER50 PE=1 SV=1	peroxidase 50-like [Chenopodium quinoa]
1.11.1.7	AUR62004071	POD06	-3.28531	-2.02897	-2.904	-3.90109	Peroxidase	Peroxidase 27 OS=Arabidopsis thaliana OX=3702 GN=PER27 PE=1 SV=1	peroxidase 27-like [Chenopodium quinoa]
1.11.1.7	AUR62004107	POD07	1.7127	1.13413	0.358701	1.20563	Peroxidase	Peroxidase 72 OS=Arabidopsis thaliana OX=3702 GN=PER72 PE=1 SV=1	peroxidase 72-like [Chenopodium quinoa]
1.11.1.7	AUR62006338	POD08	--	-2.12266	--	0.632383	Peroxidase	Cationic peroxidase 1 OS=Arachis hypogaea OX=3818 GN=PNC1 PE=1 SV=2	cationic peroxidase 1-like [Chenopodium quinoa]
1.11.1.7	AUR62006740	POD09	--	--	0.316652	1.79211	Peroxidase	Peroxidase 5 OS=Vitis vinifera OX=29760 GN=GSVIVT00037159001 PE=1 SV=2	peroxidase 5-like [Chenopodium quinoa]
1.11.1.7	AUR62006959	POD10	-0.335716	-0.549256	-1.05796	-0.49826	Peroxidase	Peroxidase 47 OS=Arabidopsis thaliana OX=3702 GN=PER47 PE=2 SV=2	peroxidase 47-like [Chenopodium quinoa]
1.11.1.7	AUR62007239	POD11	-1.00993	-1.42118	-1.57935	-0.278129	Peroxidase	Peroxidase 20 OS=Arabidopsis thaliana OX=3702 GN=PER20 PE=2 SV=1	peroxidase 20-like isoform X1 [Chenopodium quinoa]
1.11.1.7	AUR62007584	POD12	-1.98051	2.07521	-1.30563	-1.89099	Peroxidase	Peroxidase 27 OS=Arabidopsis thaliana OX=3702 GN=PER27 PE=1 SV=1	peroxidase 27-like [Chenopodium quinoa]
1.11.1.7	AUR62009065	POD13	1.14653	0.974181	-0.13965	1.62722	Peroxidase	Peroxidase 45 OS=Arabidopsis thaliana OX=3702 GN=PER45 PE=1 SV=1	peroxidase 45-like [Chenopodium quinoa]
1.11.1.7	AUR62009739	POD14	0.498283	1.51707	-0.0530012	-0.839596	Peroxidase	Cationic peroxidase 2 OS=Arachis hypogaea OX=3818 GN=PNC2 PE=2 SV=1	cationic peroxidase 2-like [Chenopodium quinoa]
1.11.1.7	AUR62009783	POD15	0.167063	-0.119999	0.343835	-1.25001	Peroxidase	Peroxidase 4 OS=Vitis vinifera OX=29760 GN=GSVIVT00023967001 PE=1 SV=1	peroxidase P7-like [Chenopodium quinoa]
1.11.1.7	AUR62012339	POD16	-0.62	-2.70539	0.257423	-1.6042	Peroxidase	Peroxidase 4 OS=Vitis vinifera OX=29760 GN=GSVIVT00023967001 PE=1 SV=1	peroxidase P7-like [Chenopodium quinoa]
1.11.1.7	AUR62012340	POD17	-0.0418546	-1.62403	-0.0797425	-0.578732	Peroxidase	Peroxidase 4 OS=Vitis vinifera OX=29760 GN=GSVIVT00023967001 PE=1 SV=1	hypothetical protein F383_17561 [Gossypium arboreum]
1.11.1.7	AUR62012342	POD18	--	6.82318	--	--	Peroxidase	Peroxidase 4 OS=Vitis vinifera OX=29760 GN=GSVIVT00023967001 PE=1 SV=1	peroxidase 4-like [Chenopodium quinoa]
1.11.1.7	AUR62012343	POD19	-0.145032	1.22084	-0.220099	0.878058	Peroxidase	Peroxidase 4 OS=Vitis vinifera OX=29760 GN=GSVIVT00023967001 PE=1 SV=1	peroxidase 4-like [Chenopodium quinoa]
1.11.1.7	AUR62012344	POD20	0.580364	2.23438	-1.19043	0.511086	Peroxidase	Peroxidase 4 OS=Vitis vinifera OX=29760 GN=GSVIVT00023967001 PE=1 SV=1	peroxidase P7-like [Chenopodium quinoa]
1.11.1.7	AUR62014733	POD21	-0.954971	-1.04791	0.119161	-2.75094	Peroxidase	Peroxidase 3 OS=Arabidopsis thaliana OX=3702 GN=PER3 PE=2 SV=1	peroxidase 3-like [Chenopodium quinoa]
1.11.1.7	AUR62014919	POD22	-1.28661	-3.55632	-0.800243	-0.485045	Peroxidase	Peroxidase 19 OS=Arabidopsis thaliana OX=3702 GN=PER19 PE=2 SV=1	peroxidase 19-like [Chenopodium quinoa]
1.11.1.7	AUR62016055	POD23	-0.65712	-2.22881	0.267266	-1.52155	Peroxidase	Peroxidase 66 OS=Arabidopsis thaliana OX=3702 GN=PER66 PE=2 SV=1	peroxidase 66-like [Chenopodium quinoa]
1.11.1.7	AUR62016056	POD24	2.09563	1.19481	1.58667	-0.0822165	Peroxidase	Peroxidase 66 OS=Arabidopsis thaliana OX=3702 GN=PER66 PE=2 SV=1	peroxidase 66-like [Chenopodium quinoa]
1.11.1.7	AUR62016057	POD25	1.91365	2.57416	1.31757	2.53105	Peroxidase	Peroxidase 66 OS=Arabidopsis thaliana OX=3702 GN=PER66 PE=2 SV=1	peroxidase 66-like [Chenopodium quinoa]
1.11.1.7	AUR62018761	POD26	-3.16669	0.863535	--	1.33964	Peroxidase	Peroxidase 20 OS=Arabidopsis thaliana OX=3702 GN=PER20 PE=2 SV=1	peroxidase 20-like isoform X1 [Chenopodium quinoa]
1.11.1.7	AUR62020603	POD27	--	2.18009	--	--	Peroxidase	Peroxidase 45 OS=Arabidopsis thaliana OX=3702 GN=PER45 PE=1 SV=1	peroxidase 45-like [Chenopodium quinoa]
1.11.1.7	AUR62021263	POD28	1.86813	1.18933	2.19413	0.227801	Peroxidase	Peroxidase 66 OS=Arabidopsis thaliana OX=3702 GN=PER66 PE=2 SV=1	peroxidase 66-like [Chenopodium quinoa]
1.11.1.7	AUR62021264	POD29	--	2.85366	--	--	Peroxidase	Peroxidase 66 OS=Arabidopsis thaliana OX=3702 GN=PER66 PE=2 SV=1	peroxidase 66-like [Chenopodium quinoa]
1.11.1.7	AUR62022983	POD30	-0.192325	-3.85604	-0.0681768	-1.36915	Peroxidase	Peroxidase 4 OS=Vitis vinifera OX=29760 GN=GSVIVT00023967001 PE=1 SV=1	peroxidase P7-like [Chenopodium quinoa]
1.11.1.7	AUR62022984	POD31	-0.0930993	-1.60679	-0.00692996	-0.81131	Peroxidase	Peroxidase 52 OS=Arabidopsis thaliana OX=3702 GN=PER52 PE=2 SV=1	peroxidase P7-like [Chenopodium quinoa]
1.11.1.7	AUR62022988	POD32	-0.572286	0.602319	-1.28217	0.0871735	Peroxidase	Peroxidase 4 OS=Vitis vinifera OX=29760 GN=GSVIVT00023967001 PE=1 SV=1	peroxidase 4-like [Chenopodium quinoa]
1.11.1.7	AUR62022989	POD33	1.84509	6.09274	0.0493568	2.09365	Peroxidase	Peroxidase 4 OS=Vitis vinifera OX=29760 GN=GSVIVT00023967001 PE=1 SV=1	peroxidase 4-like [Chenopodium quinoa]
1.11.1.7	AUR62022990	POD34	1.01562	4.80892	-1.05413	2.03963	Peroxidase	Peroxidase 52 OS=Arabidopsis thaliana OX=3702 GN=PER52 PE=2 SV=1	peroxidase P7-like [Chenopodium quinoa]
1.11.1.7	AUR62024051	POD35	-1.08061	-0.161624	-0.728756	0.364862	Peroxidase	Peroxidase 52 OS=Arabidopsis thaliana OX=3702 GN=PER52 PE=2 SV=1	peroxidase P7-like [Chenopodium quinoa]
1.11.1.7	AUR62024052	POD36	-0.64493	4.98732	-0.740821	3.29614	Peroxidase	Peroxidase 4 OS=Vitis vinifera OX=29760 GN=GSVIVT00023967001 PE=1 SV=1	peroxidase P7-like [Chenopodium quinoa]
1.11.1.7	AUR62024053	POD37	1.37436	--	-0.241211	--	Peroxidase	Peroxidase 52 OS=Arabidopsis thaliana OX=3702 GN=PER52 PE=2 SV=1	peroxidase P7-like [Chenopodium quinoa]
1.11.1.7	AUR62024054	POD38	-0.868453	-1.39436	-1.1574	-1.47577	Peroxidase	Peroxidase 4 OS=Vitis vinifera OX=29760 GN=GSVIVT00023967001 PE=1 SV=1	peroxidase 4-like [Chenopodium quinoa]
1.11.1.7	AUR62024768	POD39	-2.48228	-4.01456	-1.6362	-1.55226	Peroxidase	Peroxidase 18 OS=Arabidopsis thaliana OX=3702 GN=PER18 PE=3 SV=1	peroxidase 46-like [Chenopodium quinoa]
1.11.1.7	AUR62026666	POD40	-0.571577	2.94786	-2.05375	-0.672985	Peroxidase	Peroxidase 12 OS=Arabidopsis thaliana OX=3702 GN=PER12 PE=1 SV=1	peroxidase 12-like [Chenopodium quinoa]
1.11.1.7	AUR62026683	POD41	1.90913	5.6617	1.01609	3.86081	ABA/WDS induced protein	Abscisic stress-ripening protein 2 OS=Solanum lycopersicum OX=4081 GN=ASR2 PE=3 SV=1	abscisic stress-ripening protein 2-like [Chenopodium quinoa]
1.11.1.7	AUR62029670	POD42	0.640982	0.0505266	--	1.77665	Peroxidase	Cationic peroxidase 1 OS=Arachis hypogaea OX=3818 GN=PNC1 PE=1 SV=2	cationic peroxidase 1-like [Chenopodium quinoa]
1.11.1.7	AUR62029672	POD43	-0.385992	2.40429	0.861402	0.411071	Peroxidase	Cationic peroxidase 1 OS=Arachis hypogaea OX=3818 GN=PNC1 PE=1 SV=2	uncharacterized protein LOC110690628 [Chenopodium quinoa]
1.11.1.7	AUR62032099	POD44	-1.72635	-1.08495	-0.920455	-0.55549	Peroxidase	Peroxidase 63 OS=Arabidopsis thaliana OX=3702 GN=PER63 PE=2 SV=1	peroxidase 31-like [Chenopodium quinoa]
1.11.1.7	AUR62036224	POD45	-0.517962	4.16798	-0.165781	0.266644	Peroxidase	Peroxidase 4 OS=Vitis vinifera OX=29760 GN=GSVIVT00023967001 PE=1 SV=1	peroxidase P7-like [Chenopodium quinoa]
1.11.1.7	AUR62036531	POD46	-2.0634	--	--	--	Peroxidase	Peroxidase 57 OS=Arabidopsis thaliana OX=3702 GN=PER57 PE=1 SV=1	peroxidase 57-like [Chenopodium quinoa]
1.11.1.7	AUR62037683	POD47	-2.86965	-3.30067	-2.0107	-1.99741	Peroxidase	Peroxidase 18 OS=Arabidopsis thaliana OX=3702 GN=PER18 PE=3 SV=1	peroxidase 18-like [Chenopodium quinoa]
1.11.1.7	AUR62040443	POD48	-0.701806	-1.98775	-1.35492	0.00738292	Peroxidase	Peroxidase 52 OS=Arabidopsis thaliana OX=3702 GN=PER52 PE=2 SV=1	hypothetical protein EJB05_29987, partial [Eragrostis curvula]
1.11.1.7	AUR62040570	POD49	-1.14462	2.57433	-0.88416	-1.21122	Peroxidase	Peroxidase 12 OS=Arabidopsis thaliana OX=3702 GN=PER12 PE=1 SV=1	peroxidase 12-like [Chenopodium quinoa]
1.11.1.7	AUR62040571	POD50	0.0846529	1.3853	-0.0456572	1.33293	Peroxidase	Peroxidase 12 OS=Arabidopsis thaliana OX=3702 GN=PER12 PE=1 SV=1	peroxidase 12-like [Chenopodium quinoa]
1.11.1.7	AUR62042275	POD51	-1.25003	-0.463615	-0.237547	0.878635	Peroxidase	Peroxidase 44 OS=Arabidopsis thaliana OX=3702 GN=PER44 PE=2 SV=1	peroxidase 44-like [Spinacia oleracea]
1.11.1.7	AUR62043129	POD52	-1.25848	--	--	--	--	--	peroxidase 44-like [Spinacia oleracea]
1.11.1.7	AUR62043200	POD53	-0.249819	-3.44495	-0.0340581	-2.15326	Myb-like DNA-binding domain	Transcription factor SRM1 OS=Arabidopsis thaliana OX=3702 GN=SRM1 PE=1 SV=1	transcription factor SRM1-like [Chenopodium quinoa]
1.11.1.7	AUR62044305	POD54	1.05712	1.44812	1.54156	-0.582418	Peroxidase	Peroxidase 4 OS=Vitis vinifera OX=29760 GN=GSVIVT00023967001 PE=1 SV=1	peroxidase 4-like [Chenopodium quinoa]
1.11.1.7	AUR62044306	POD55	0.920499	1.60383	1.45075	-0.477625	Peroxidase	Peroxidase 4 OS=Vitis vinifera OX=29760 GN=GSVIVT00023967001 PE=1 SV=1	peroxidase 4-like [Chenopodium quinoa]
1.11.1.7	AUR62044307	POD56	0.923327	1.40594	1.41336	-0.692702	Peroxidase	Peroxidase 4 OS=Vitis vinifera OX=29760 GN=GSVIVT00023967001 PE=1 SV=1	peroxidase 4-like [Chenopodium quinoa]
1.11.1.7	AUR62044431	POD57	0.31384	1.01408	0.422507	-0.370101	Peroxidase	Peroxidase 12 OS=Arabidopsis thaliana OX=3702 GN=PER12 PE=1 SV=1	peroxidase 12-like [Chenopodium quinoa]
1.11.1.7	Chenopodium_quinoa_newGene_5718	POD58	0.0516127	1.51013	-1.12018	--	Peroxidase	Peroxidase 21 OS=Arabidopsis thaliana OX=3702 GN=PER21 PE=1 SV=1	peroxidase 21 isoform X1 [Chenopodium quinoa]
23.1.133	AUR62044290	Expansin-like A2	-1.08635	1.40165	-0.0296256	0.906982	Expansin-like A2	Expansin-like A2 OS=Arabidopsis thaliana OX=3702 GN=EXLA2 PE=2 SV=1	hypothetical protein Csa_020448 [Cucumis sativus]
23.1.133	AUR62006620	Transferase-01	-0.164034	-2.14278	0.0345648	-2.71965	Transferase family	Rosmarinate synthase OS=Plectranthus scutellarioides OX=4142 GN=RAS PE=1 SV=1	omega-hydroxypalmitate O-feruloyl transferase-like [Chenopodium quinoa]
23.1.133	AUR62014351	Transferase-02	0.585337	-2.17395	0.579139	-1.16195	Transferase family	Protein ECERIFERUM 26-like OS=Arabidopsis thaliana OX=3702 GN=CER26L PE=2 SV=1	protein ECERIFERUM 26-like [Chenopodium quinoa]
23.1.133	AUR62019094	Transferase-03	0.0919924	-4.27094	0.00472754	-2.89625	Transferase family	Protein ECERIFERUM 2 OS=Arabidopsis thaliana OX=3702 GN=CER2 PE=1 SV=1	protein ECERIFERUM 2-like [Chenopodium quinoa]
23.1.133	AUR62026556	Transferase-04	0.0107165	-1.6739	-0.158125	0.372228	Transferase family	Anthranilate N-benzoyltransferase protein 3 OS=Dianthus caryophyllus OX=3570 GN=HCBT3 PE=1 SV=1	anthranilate N-benzoyltransferase protein 2-like [Chenopodium quinoa]
23.1.133	AUR62039427	Transferase-05	0.0479261	-3.49887	-0.773546	0.285169	Transferase family	Anthranilate N-benzoyltransferase protein 2 OS=Dianthus caryophyllus OX=3570 GN=HCBT2 PE=1 SV=1	anthranilate N-benzoyltransferase protein 2-like [Chenopodium quinoa]
23.1.133	AUR62043529	Transferase-06	0.164909	-3.95725	0.115057	-2.61384	Transferase family	Protein ECERIFERUM 26-like OS=Arabidopsis thaliana OX=3702 GN=CER26L PE=2 SV=1	protein ECERIFERUM 2-like [Chenopodium quinoa]
23.1.133	AUR62018561	Transferase-07	3.36218	--	--	1.65571	Transferase family	Protein ECERIFERUM 26 OS=Arabidopsis thaliana OX=3702 GN=CER26 PE=2 SV=1	protein ECERIFERUM 26-like [Chenopodium quinoa]
23.1.133	AUR62019095	Transferase-08	1.88773	0.973086	1.09412	-0.0991138	Transferase family	Protein ECERIFERUM 2 OS=Arabidopsis thaliana OX=3702 GN=CER2 PE=1 SV=1	protein ECERIFERUM 2-like [Chenopodium quinoa]
23.1.133	AUR62043528	Transferase-09	1.86188	0.772411	1.0973	-0.114913	Transferase family	Protein ECERIFERUM 2 OS=Arabidopsis thaliana OX=3702 GN=CER2 PE=1 SV=1	protein ECERIFERUM 2-like [Chenopodium quinoa]
23.1.133	Chenopodium_quinoa_newGene_17388	Transferase-10	-1.65038	-0.0557625	-1.3221	-0.299181	Transferase family	Putrescine hydroxycinnamoyltransferase 1 OS=Oryza sativa subsp. japonica OX=39947 GN=PHT1 PE=2 SV=1	shikimate O-hydroxycinnamoyltransferase-like [Chenopodium quinoa]
3.11	AUR62033104	S33-01	0.562973	3.67434	0.963492	2.70883	Serine aminopeptidase, S33	Caffeoylshikimate esterase OS=Arabidopsis thaliana OX=3702 GN=CSE PE=1 SV=1	caffeoylshikimate esterase-like [Chenopodium quinoa]
3.11	AUR62002858	S33-02	0.0930936	-1.02372	-0.621303	-0.131221	Serine aminopeptidase, S33	Caffeoylshikimate esterase OS=Arabidopsis thaliana OX=3702 GN=CSE PE=1 SV=1	caffeoylshikimate esterase-like [Chenopodium quinoa]
3.11	AUR62023303	S33-03	-0.331702	-1.25874	-0.872196	-0.80116	Serine aminopeptidase, S33	--	caffeoylshikimate esterase-like [Chenopodium quinoa]
3.11	AUR62035207	S33-04	-0.434236	-1.18129	-0.0350347	-0.595352	Serine aminopeptidase, S33	Caffeoylshikimate esterase OS=Arabidopsis thaliana OX=3702 GN=CSE PE=1 SV=1	caffeoylshikimate esterase-like [Chenopodium quinoa]
2.1.1.68	AUR62004568	O-methyltransferase-01	1.45822	4.48933	1.01329	2.61478	O-methyltransferase domain	Caffeic acid 3-O-methyltransferase OS=Capsicum annuum OX=4072 GN=COMT PE=2 SV=2	caffeic acid 3-O-methyltransferase-like [Chenopodium quinoa]
2.1.1.68	AUR62005984	O-methyltransferase-02	0.921163	2.20661	0.433268	1.97953	O-methyltransferase domain	Caffeic acid 3-O-methyltransferase OS=Rosa chinensis OX=74649 GN=COMT1 PE=2 SV=1	caffeic acid 3-O-methyltransferase-like [Chenopodium quinoa]
2.1.1.68	AUR62017462	FAR1-01	-0.411827	2.49479	0.123564	1.16262	FAR1 DNA-binding domain	OVARIAN TUMOR DOMAIN-containing deubiquitinating enzyme 12 OS=Arabidopsis thaliana OX=3702 GN=OTU12 PE=2 SV=1	protein FAR1-RELATED SEQUENCE 5-like [Chenopodium quinoa]
2.1.1.68	AUR62022680	O-methyltransferase-03	-0.14494	1.56695	-0.376553	-0.819446	O-methyltransferase domain	Caffeic acid 3-O-methyltransferase OS=Catharanthus roseus OX=4058 GN=COMT1 PE=2 SV=1	caffeic acid 3-O-methyltransferase-like [Chenopodium quinoa]
2.1.1.68	AUR62022681	O-methyltransferase-04	-0.237192	1.09701	0.92533	1.51564	O-methyltransferase domain	Caffeic acid 3-O-methyltransferase OS=Capsicum annuum OX=4072 GN=COMT PE=2 SV=2	caffeic acid 3-O-methyltransferase-like [Chenopodium quinoa]
2.1.1.68	AUR62028085	O-methyltransferase-05	-0.767026	1.88636	-1.39081	0.300333	O-methyltransferase domain	Caffeic acid 3-O-methyltransferase 1 OS=Populus tremuloides OX=3693 GN=OMT1 PE=1 SV=1	caffeic acid 3-O-methyltransferase-like [Chenopodium quinoa]
2.1.1.68	AUR62034575	O-methyltransferase-06	-0.222172	3.68646	-0.138352	1.42209	O-methyltransferase domain	Caffeic acid 3-O-methyltransferase OS=Prunus dulcis OX=3755 GN=COMT1 PE=2 SV=1	caffeic acid 3-O-methyltransferase-like [Chenopodium quinoa]
2.1.1.68	AUR62025830	O-methyltransferase-07	0.392141	-1.28514	0.0427423	0.136442	O-methyltransferase domain	Caffeic acid 3-O-methyltransferase 1 OS=Ocimum basilicum OX=39350 GN=COMT1 PE=2 SV=1	caffeic acid 3-O-methyltransferase-like [Chenopodium quinoa]
2.1.1.68	AUR62029078	O-methyltransferase-08	-0.933249	-2.31108	-0.521385	-2.25227	O-methyltransferase domain	Caffeic acid 3-O-methyltransferase OS=Capsicum annuum OX=4072 GN=COMT PE=2 SV=2	caffeic acid 3-O-methyltransferase-like [Chenopodium quinoa]
2.1.1.68	AUR62026973	O-methyltransferase-09	0.160209	-0.980164	0.0204537	-1.27117	O-methyltransferase domain	Caffeic acid 3-O-methyltransferase OS=Capsicum chinense OX=80379 GN=COMT PE=2 SV=1	caffeic acid 3-O-methyltransferase-like [Chenopodium quinoa]
2.1.1.68	Chenopodium_quinoa_newGene_6441	FAR1-02	-3.18044	-0.60839	-1.66408	0.584158	FAR1 DNA-binding domain	--	protein FAR1-RELATED SEQUENCE 3-like [Chenopodium quinoa]
21.1.104	AUR62005609	O-methyltransferase-10	-2.0121	1.91359	-2.12472	-0.6578	O-methyltransferase	Flavonoid 3',5'-methyltransferase OS=Vitis vinifera OX=29760 GN=FAOMT PE=1 SV=1	flavonoid 3',5'-methyltransferase-like [Chenopodium quinoa]
21.1.104	AUR62027468	O-methyltransferase-11	--	2.16303	--	1.39637	O-methyltransferase	Caffeoyl-CoA O-methyltransferase OS=Stellaria longipes OX=19744 PE=2 SV=1	caffeoyl-CoA O-methyltransferase-like [Chenopodium quinoa]
21.1.104	AUR62036299	O-methyltransferase-12	-0.597259	-2.27207	-0.789059	-0.769491	O-methyltransferase	Tricin synthase 1 OS=Oryza sativa subsp. japonica OX=39947 GN=ROMT-15 PE=1 SV=1	uncharacterized protein LOC110688844 [Chenopodium quinoa]
21.1.104	AUR62038410	O-methyltransferase-13	-0.526771	-1.08592	-0.67379	-0.69073	O-methyltransferase	Tricin synthase 1 OS=Oryza sativa subsp. japonica OX=39947 GN=ROMT-15 PE=1 SV=1	uncharacterized protein LOC110739844 [Chenopodium quinoa]
21.1.104	AUR62003897	O-methyltransferase-14	-0.224866	0.442985	-1.59383	-0.446473	O-methyltransferase	Caffeoyl-CoA O-methyltransferase 2 OS=Populus trichocarpa OX=3694 GN=CCOAOMT2 PE=2 SV=1	caffeoyl-CoA O-methyltransferase 1-like [Chenopodium quinoa]
21.1.104	AUR62013225	O-methyltransferase-15	0.636265	0.840334	0.481375	1.03165	O-methyltransferase	Caffeoyl-CoA O-methyltransferase OS=Mesembryanthemum crystallinum OX=3544 PE=2 SV=1	caffeoyl-CoA O-methyltransferase 5-like [Chenopodium quinoa]
F5H	AUR62007646	P450-02	2.09511	5.62387	1.70528	1.92374	Cytochrome P450	Cytochrome P450 84A1 OS=Arabidopsis thaliana OX=3702 GN=CYP84A1 PE=1 SV=1	cytochrome P450 84A1-like [Chenopodium quinoa]
1.14.1496	AUR62002150	P450-03	0.482776	0.199588	0.399988	1.05743	Cytochrome P450	Cytochrome P450 98A2 OS=Glycine max OX=3847 GN=CYP98A2 PE=2 SV=1	cytochrome P450 98A2-like [Chenopodium quinoa]
1.14.1496	AUR62024300	P450-04	--	-1.35051	--	1.95617	Cytochrome P450	Cytochrome P450 98A2 OS=Glycine max OX=3847 GN=CYP98A2 PE=2 SV=1	cytochrome P450 98A2-like, partial [Chenopodium quinoa]

## Sheet:  Starch and sucrose metabolism
Table S2 Starch and sucrose metabolism involves genes
	#ID	Name	HZ1-C3-vs-T3	HZ1-C9-vs-T9	L1-C3-vs-T3	L1-C9-vs-T9	Pfam_annotation	Swiss_Prot_annotation	NR_annotation
2.7.1.1	AUR62000163	Hexokinase-01	-1.58606	0.220952	-0.588662	0.232733	Hexokinase	Hexokinase-3 OS=Arabidopsis thaliana OX=3702 GN=At1g50460 PE=1 SV=1	zinc finger BED domain-containing protein RICESLEEPER 2-like [Chenopodium quinoa]
2.7.1.1	AUR62039848	Hexokinase-02	-3.08343	0.781069	-2.00873	1.43259	Hexokinase	Hexokinase-3 OS=Arabidopsis thaliana OX=3702 GN=At1g50460 PE=1 SV=1	hexokinase-3-like [Chenopodium quinoa]
2.7.1.1	AUR62021400	Hexokinase-03	0.951868	1.11328	0.763174	0.348204	Hexokinase	Hexokinase-1 OS=Spinacia oleracea OX=3562 GN=HXK1 PE=2 SV=1	hexokinase-1-like [Chenopodium quinoa]
2.7.1.1	AUR62033832	Hexokinase-04	--	1.869	0.373515	1.37301	Hexokinase	Hexokinase-2, chloroplastic OS=Nicotiana tabacum OX=4097 GN=HXK2 PE=2 SV=1	hexokinase-2, chloroplastic-like isoform X1 [Chenopodium quinoa]
2.7.1.1	AUR62020198	Hexokinase-05	-0.557698	-1.89924	-0.86605	-0.882496	Hexokinase	Hexokinase-4 OS=Arabidopsis thaliana OX=3702 GN=At3g20040 PE=1 SV=2	uncharacterized protein LOC110683552 [Chenopodium quinoa]
2.7.1.1	AUR62022221	Hexokinase-06	-0.226603	-0.923666	0.141493	-1.07417	Hexokinase	Hexokinase-1 OS=Nicotiana tabacum OX=4097 GN=HXK1 PE=2 SV=1	hexokinase-1-like [Chenopodium quinoa]
2.7.1.4	AUR62002325	pfkB-01	0.739265	2.81162	0.214454	1.41422	pfkB family carbohydrate kinase	Probable fructokinase-4 OS=Arabidopsis thaliana OX=3702 GN=At3g59480 PE=2 SV=1	probable fructokinase-4 [Chenopodium quinoa]
2.7.1.4	AUR62007900	pfkB-02	-0.3622	-1.83844	-0.256813	-0.0921066	pfkB family carbohydrate kinase	Fructokinase-like 2, chloroplastic OS=Arabidopsis thaliana OX=3702 GN=FLN2 PE=1 SV=2	fructokinase-like 2, chloroplastic [Chenopodium quinoa]
2.7.1.4	AUR62015431	pfkB-03	-0.0906235	-1.11688	-0.166328	-0.298174	--	Probable fructokinase-6, chloroplastic OS=Arabidopsis thaliana OX=3702 GN=At1g66430 PE=2 SV=1	uncharacterized protein LOC110689450 [Chenopodium quinoa]
2.7.1.4	AUR62016061	pfkB-04	1.10962	3.33144	0.82679	2.71712	pfkB family carbohydrate kinase	Probable fructokinase-7 OS=Arabidopsis thaliana OX=3702 GN=At5g51830 PE=1 SV=1	probable fructokinase-7 [Chenopodium quinoa]
2.7.1.4	AUR62021269	pfkB-05	1.52698	3.58161	0.864876	2.35298	pfkB family carbohydrate kinase	Probable fructokinase-7 OS=Arabidopsis thaliana OX=3702 GN=At5g51830 PE=1 SV=1	probable fructokinase-7 [Chenopodium quinoa]
2.7.1.4	AUR62023179	pfkB-06	-0.0168342	-0.683712	0.478651	-1.02453	pfkB family carbohydrate kinase	Probable fructokinase-6, chloroplastic OS=Arabidopsis thaliana OX=3702 GN=At1g66430 PE=2 SV=1	probable fructokinase-6, chloroplastic [Chenopodium quinoa]
2.7.1.4	AUR62023180	pfkB-07	-0.627534	-1.80691	-0.39491	-0.916172	pfkB family carbohydrate kinase	Probable fructokinase-6, chloroplastic OS=Arabidopsis thaliana OX=3702 GN=At1g66430 PE=2 SV=1	probable fructokinase-6, chloroplastic [Chenopodium quinoa]
2.7.1.4	AUR62023226	pfkB-08	0.0376948	-2.0647	-0.222103	-1.33122	pfkB family carbohydrate kinase	Probable fructokinase-6, chloroplastic OS=Arabidopsis thaliana OX=3702 GN=At1g66430 PE=2 SV=1	probable fructokinase-6, chloroplastic [Chenopodium quinoa]
2.7.1.4	AUR62023862	pfkB-09	0.777659	2.85607	-0.208137	1.31747	pfkB family carbohydrate kinase	Probable fructokinase-4 OS=Arabidopsis thaliana OX=3702 GN=At3g59480 PE=2 SV=1	probable fructokinase-4 [Chenopodium quinoa]
2.7.1.4	AUR62039342	pfkB-10	0.684761	-0.0740834	0.50187	1.00877	pfkB family carbohydrate kinase	Fructokinase-like 1, chloroplastic OS=Arabidopsis thaliana OX=3702 GN=FLN1 PE=1 SV=1	fructokinase-like 1, chloroplastic [Chenopodium quinoa]
3.2.1.26	AUR62038146	G-hydrolases-01	0.838525	-1.18479	0.910572	2.42928	Glycosyl hydrolases family 32 N-terminal domain	Beta-fructofuranosidase, insoluble isoenzyme CWINV1 OS=Arabidopsis thaliana OX=3702 GN=CWINV1 PE=1 SV=1	beta-fructofuranosidase, insoluble isoenzyme CWINV1-like [Chenopodium quinoa]
3.2.1.26	AUR62009834	G-hydrolases-02	--	-1.49151	--	--	Glycosyl hydrolases family 32 N-terminal domain	Fructan 6-exohydrolase OS=Beta vulgaris OX=161934 GN=6-FEH PE=1 SV=1	fructan 6-exohydrolase-like [Chenopodium quinoa]
3.2.1.26	AUR62039932	G-hydrolases-03	-0.133855	-1.12747	-0.307169	-0.951292	Glycosyl hydrolases family 32 N-terminal domain	Acid beta-fructofuranosidase 2, vacuolar OS=Rosa hybrid cultivar OX=128735 PE=2 SV=1	acid beta-fructofuranosidase 2, vacuolar-like [Chenopodium quinoa]
3.2.1.26	AUR62015518	G-hydrolases-04	1.0044	1.7382	1.18823	0.564218	Glycosyl hydrolases family 32 N-terminal domain	Acid beta-fructofuranosidase OS=Solanum lycopersicum OX=4081 GN=TIV1 PE=2 SV=1	acid beta-fructofuranosidase-like [Chenopodium quinoa]
3.2.1.26	AUR62007474	G-hydrolases-05	0.333966	-1.08685	-0.409797	-1.11956	Glycosyl hydrolases family 32 N-terminal domain	Acid beta-fructofuranosidase 2, vacuolar OS=Rosa hybrid cultivar OX=128735 PE=2 SV=1	acid beta-fructofuranosidase 2, vacuolar-like [Chenopodium quinoa]
3.2.1.26	AUR62001289	UPF0481 protein-01	1.16647	3.19522	0.9418	1.21123	Plant protein of unknown function	UPF0481 protein At3g47200 OS=Arabidopsis thaliana OX=3702 GN=At3g47200 PE=2 SV=1	UPF0481 protein At3g47200-like [Chenopodium quinoa]
3.2.1.26	AUR62024893	UPF0481 protein-02	-1.60926	-3.96626	-0.824245	-1.62672	Plant protein of unknown function	--	UPF0481 protein At3g47200-like isoform X1 [Chenopodium quinoa]
3.2.1.26	AUR62025675	UPF0481 protein-03	-0.233783	1.02902	0.0686716	0.390734	Plant protein of unknown function	UPF0481 protein At3g47200 OS=Arabidopsis thaliana OX=3702 GN=At3g47200 PE=2 SV=1	UPF0481 protein At3g47200-like [Chenopodium quinoa]
3.2.1.26	AUR62030645	UPF0481 protein-04	-0.504584	-3.16684	-1.3691	-1.51826	Plant protein of unknown function	--	UPF0481 protein At3g47200-like [Chenopodium quinoa]
3.2.1.26	AUR62030656	UPF0481 protein-05	0.145424	-2.58933	-0.116545	-0.800783	Plant protein of unknown function	--	UPF0481 protein At3g47200-like [Chenopodium quinoa]
3.2.1.26	AUR62043113	UPF0481 protein-06	--	--	0.452004	-2.0653	Plant protein of unknown function	UPF0481 protein At3g47200 OS=Arabidopsis thaliana OX=3702 GN=At3g47200 PE=2 SV=1	UPF0481 protein At3g47200-like [Chenopodium quinoa]
3.2.1.26	Chenopodium_quinoa_newGene_15769	UPF0481 protein-07	0.685562	-3.11361	-0.267455	-2.31923	Plant protein of unknown function	--	UPF0481 protein At3g47200-like isoform X1 [Chenopodium quinoa]
3.2.1.26	AUR62038242	UPF0481 protein-08	-0.141209	-1.43418	-0.930418	-0.381258	Plant protein of unknown function	UPF0481 protein At3g47200 OS=Arabidopsis thaliana OX=3702 GN=At3g47200 PE=2 SV=1	UPF0481 protein At3g47200-like [Chenopodium quinoa]
3.2.1.26	AUR62030659	UPF0481 protein-09	-0.0704933	-3.89021	--	--	Plant protein of unknown function	--	UPF0481 protein At3g47200-like isoform X1 [Chenopodium quinoa]
3.2.1.26	AUR62030660	UPF0481 protein-10	0.319353	-1.37778	--	--	Plant protein of unknown function	--	UPF0481 protein At3g47200-like [Chenopodium quinoa]
3.2.1.21	AUR62000070	G-hydrolases-06	--	--	1.13037	1.62977	Glycosyl hydrolase family 1	Beta-glucosidase 13 OS=Oryza sativa subsp. japonica OX=39947 GN=BGLU13 PE=2 SV=2	beta-glucosidase 13-like [Chenopodium quinoa]
3.2.1.21	AUR62001589	G-hydrolases-07	1.61779	0.923527	0.22002	0.732485	Glycosyl hydrolase family 3 N terminal domain	Beta-xylosidase/alpha-L-arabinofuranosidase 2 OS=Medicago sativa subsp. varia OX=36902 GN=Xyl2 PE=2 SV=1	uncharacterized protein LOC110688204 [Chenopodium quinoa]
3.2.1.21	AUR62004018	G-hydrolases-08	0.720477	1.74015	0.272618	0.386968	Glycosyl hydrolase family 3 N terminal domain	Beta-D-xylosidase 1 OS=Arabidopsis thaliana OX=3702 GN=BXL1 PE=1 SV=1	uncharacterized protein LOC110682447 [Chenopodium quinoa]
3.2.1.21	AUR62006612	G-hydrolases-09	0.569009	1.12271	0.781817	0.457285	Glycosyl hydrolase family 1	Beta-glucosidase 42 OS=Arabidopsis thaliana OX=3702 GN=BGLU42 PE=2 SV=1	beta-glucosidase 42-like [Chenopodium quinoa]
3.2.1.21	AUR62007526	G-hydrolases-10	--	2.12185	-0.336114	--	Glycosyl hydrolase family 3 N terminal domain	Probable beta-D-xylosidase 5 OS=Arabidopsis thaliana OX=3702 GN=BXL5 PE=2 SV=2	uncharacterized protein LOC110685748 [Chenopodium quinoa]
3.2.1.21	AUR62007527	G-hydrolases-11	0.33726	1.23022	-0.0462379	0.557478	Glycosyl hydrolase family 3 N terminal domain	Beta-D-xylosidase 1 OS=Arabidopsis thaliana OX=3702 GN=BXL1 PE=1 SV=1	uncharacterized protein LOC110685747 [Chenopodium quinoa]
3.2.1.21	AUR62009820	G-hydrolases-12	0.214023	-0.941843	0.498254	-1.01566	Glycosyl hydrolase family 1	Beta-glucosidase 44 OS=Arabidopsis thaliana OX=3702 GN=BGLU44 PE=2 SV=1	beta-glucosidase 44-like [Chenopodium quinoa]
3.2.1.21	AUR62012668	G-hydrolases-13	-0.441907	-1.21483	-0.714989	-0.832302	Glycosyl hydrolase family 1	Beta-glucosidase 46 OS=Arabidopsis thaliana OX=3702 GN=BGLU46 PE=1 SV=2	beta-glucosidase 46-like isoform X2 [Chenopodium quinoa]
3.2.1.21	AUR62014289	G-hydrolases-14	-0.454581	-1.95639	0.117219	-1.31126	Glycosyl hydrolase family 3 C-terminal domain	Beta-xylosidase/alpha-L-arabinofuranosidase 2 OS=Medicago sativa subsp. varia OX=36902 GN=Xyl2 PE=2 SV=1	uncharacterized protein LOC110724576 [Chenopodium quinoa]
3.2.1.21	AUR62019244	G-hydrolases-15	1.07111	-1.08421	0.202887	-0.0254263	Glycosyl hydrolase family 1	Beta-glucosidase 12 OS=Oryza sativa subsp. indica OX=39946 GN=BGLU12 PE=3 SV=1	beta-glucosidase 13-like [Chenopodium quinoa]
3.2.1.21	AUR62020191	G-hydrolases-16	0.382614	1.04046	-0.0291283	1.03139	Glycosyl hydrolase family 3 N terminal domain	Beta-xylosidase/alpha-L-arabinofuranosidase 2 OS=Medicago sativa subsp. varia OX=36902 GN=Xyl2 PE=2 SV=1	uncharacterized protein LOC110683530 [Chenopodium quinoa]
3.2.1.21	AUR62024339	G-hydrolases-17	0.252657	1.86513	-0.933792	--	Leucine rich repeat	Polygalacturonase inhibitor OS=Pyrus communis OX=23211 GN=PGIP PE=1 SV=1	polygalacturonase inhibitor-like [Chenopodium quinoa]
3.2.1.21	AUR62024340	G-hydrolases-18	-0.197738	1.6671	-0.817968	-0.261384	Leucine rich repeat N-terminal domain	Polygalacturonase inhibitor 1 OS=Arabidopsis thaliana OX=3702 GN=PGIP1 PE=1 SV=1	polygalacturonase inhibitor 1-like [Chenopodium quinoa]
3.2.1.21	AUR62029270	G-hydrolases-19	1.4094	2.91905	-0.102917	1.73964	Glycosyl hydrolase family 1	Putative beta-glucosidase 41 OS=Arabidopsis thaliana OX=3702 GN=BGLU41 PE=3 SV=2	putative beta-glucosidase 41 [Chenopodium quinoa]
3.2.1.21	AUR62029647	G-hydrolases-20	0.228798	0.457259	0.266829	-1.59398	Glycosyl hydrolase family 1	Beta-glucosidase 12 OS=Oryza sativa subsp. indica OX=39946 GN=BGLU12 PE=3 SV=1	beta-glucosidase 13-like [Chenopodium quinoa]
3.2.1.21	AUR62033126	G-hydrolases-21	0.310359	0.199694	0.450407	1.45646	Glycosyl hydrolase family 1	Beta-glucosidase 31 OS=Oryza sativa subsp. japonica OX=39947 GN=BGLU31 PE=2 SV=1	cyanidin 3-O-glucoside 5-O-glucosyltransferase (acyl-glucose)-like [Chenopodium quinoa]
3.2.1.21	AUR62033128	G-hydrolases-22	0.460389	1.45523	0.885765	1.18246	Glycosyl hydrolase family 1	Beta-glucosidase 32 OS=Oryza sativa subsp. japonica OX=39947 GN=BGLU32 PE=2 SV=2	cyanidin 3-O-glucoside 5-O-glucosyltransferase (acyl-glucose)-like [Chenopodium quinoa]
3.2.1.21	AUR62033130	G-hydrolases-23	0.492398	2.33896	0.857059	1.19509	Glycosyl hydrolase family 1	Beta-glucosidase 11 OS=Arabidopsis thaliana OX=3702 GN=BGLU11 PE=2 SV=2	beta-glucosidase 31-like [Chenopodium quinoa]
3.2.1.21	AUR62033979	G-hydrolases-24	-0.195738	-1.25341	0.168005	0.47738	Glycosyl hydrolase family 1	Beta-glucosidase 12 OS=Oryza sativa subsp. indica OX=39946 GN=BGLU12 PE=3 SV=1	beta-glucosidase 24-like [Chenopodium quinoa]
3.2.1.21	AUR62034146	G-hydrolases-25	-0.620482	-1.70402	-0.47665	-1.18833	Glycosyl hydrolase family 3 C-terminal domain	Beta-xylosidase/alpha-L-arabinofuranosidase 2 OS=Medicago sativa subsp. varia OX=36902 GN=Xyl2 PE=2 SV=1	uncharacterized protein LOC110737394 [Chenopodium quinoa]
3.2.1.21	AUR62034565	G-hydrolases-26	-0.0226021	3.39495	--	--	Glycosyl hydrolase family 1	Beta-glucosidase 11 OS=Arabidopsis thaliana OX=3702 GN=BGLU11 PE=2 SV=2	beta-glucosidase 11-like [Chenopodium quinoa]
3.2.1.21	AUR62036281	G-hydrolases-27	-0.611177	-1.19172	-1.08852	0.0706286	Glycosyl hydrolase family 3 N terminal domain	Beta-xylosidase/alpha-L-arabinofuranosidase 2 OS=Medicago sativa subsp. varia OX=36902 GN=Xyl2 PE=2 SV=1	uncharacterized protein LOC110688825 [Chenopodium quinoa]
3.2.1.21	AUR62036281	G-hydrolases-28	-0.611177	-1.19172	-1.08852	0.0706286	Glycosyl hydrolase family 3 N terminal domain	Beta-xylosidase/alpha-L-arabinofuranosidase 2 OS=Medicago sativa subsp. varia OX=36902 GN=Xyl2 PE=2 SV=1	uncharacterized protein LOC110688825 [Chenopodium quinoa]
3.2.1.21	AUR62041147	G-hydrolases-29	0.433391	1.32817	0.137807	1.90035	Glycosyl hydrolase family 1	Putative beta-glucosidase 41 OS=Arabidopsis thaliana OX=3702 GN=BGLU41 PE=3 SV=2	putative beta-glucosidase 41 isoform X1 [Chenopodium quinoa]
3.2.1.21	AUR62041464	G-hydrolases-30	2.00164	5.03646	1.65066	1.98403	Glycosyl hydrolase family 1	Beta-glucosidase 12 OS=Oryza sativa subsp. indica OX=39946 GN=BGLU12 PE=3 SV=1	beta-glucosidase 24-like [Chenopodium quinoa]
3.2.1.21	AUR62014561	Un-protein	0.157917	6.61232	--	--	--	--	uncharacterized protein LOC110720816 [Chenopodium quinoa]
3.2.1.21	AUR62017377	Un-protein	-1.22084	-3.31297	-0.84244	--	--	--	uncharacterized protein LOC110692127 [Chenopodium quinoa]
3.2.1.21	Chenopodium_quinoa_newGene_13452	Un-protein	-0.610435	6.81373	--	-4.9734	--	--	uncharacterized protein LOC110728855 [Chenopodium quinoa]
3.2.1.20	AUR62021097	G-hydrolases-31	0.542198	1.72551	0.235952	0.406842	Glycosyl hydrolases family 31	Alpha-glucosidase OS=Beta vulgaris OX=161934 PE=1 SV=1	alpha-glucosidase-like [Chenopodium quinoa]
3.2.1.20	AUR62030309	G-hydrolases-32	-0.11582	1.70347	-0.368371	0.650503	Glycosyl hydrolases family 31	Alpha-xylosidase 1 OS=Arabidopsis thaliana OX=3702 GN=XYL1 PE=1 SV=1	uncharacterized protein LOC110710671 [Chenopodium quinoa]
3.2.1.20	AUR62031441	G-hydrolases-33	-0.421181	1.41341	-0.0611302	-0.505075	Glycosyl hydrolases family 31	Alpha-glucosidase OS=Beta vulgaris OX=161934 PE=1 SV=1	LOW QUALITY PROTEIN: alpha-glucosidase-like [Chenopodium quinoa]
3.2.1.20	AUR62031439	G-hydrolases-34	-0.144799	-1.69839	-0.0940224	-0.858414	Glycosyl hydrolases family 31	Alpha-glucosidase OS=Spinacia oleracea OX=3562 PE=1 SV=1	alpha-glucosidase-like [Chenopodium quinoa]
3.2.1.20	AUR62021100	G-hydrolases-35	0.0684529	-0.471037	0.0927022	-1.1758	Glycosyl hydrolases family 31	Alpha-glucosidase OS=Spinacia oleracea OX=3562 PE=1 SV=1	alpha-glucosidase-like [Chenopodium quinoa]
3.2.1.39	AUR62000159	G-hydrolases-36	-0.88363	2.32609	-0.358597	-0.119854	Glycosyl hydrolases family 17	Glucan endo-1,3-beta-glucosidase OS=Vitis vinifera OX=29760 GN=VIT_06s0061g00120 PE=1 SV=2	glucan endo-1,3-beta-glucosidase-like [Chenopodium quinoa]
3.2.1.39	AUR62001889	G-hydrolases-37	-1.22642	-2.35555	-0.791075	-1.4723	Glycosyl hydrolases family 17	Glucan endo-1,3-beta-glucosidase 9 OS=Arabidopsis thaliana OX=3702 GN=At5g58480 PE=2 SV=1	glucan endo-1,3-beta-glucosidase 9-like [Chenopodium quinoa]
3.2.1.39	AUR62009685	G-hydrolases-38	-0.459719	-2.25823	-0.2008	-0.598657	Glycosyl hydrolases family 17	Glucan endo-1,3-beta-glucosidase 9 OS=Arabidopsis thaliana OX=3702 GN=At5g58480 PE=2 SV=1	glucan endo-1,3-beta-glucosidase 9-like [Chenopodium quinoa]
3.2.1.39	AUR62009756	G-hydrolases-39	0.0427394	1.8269	0.332772	1.12015	Glycosyl hydrolases family 17	Glucan endo-1,3-beta-glucosidase 14 OS=Arabidopsis thaliana OX=3702 GN=At2g27500 PE=2 SV=2	glucan endo-1,3-beta-glucosidase 14-like [Chenopodium quinoa]
3.2.1.39	AUR62010875	G-hydrolases-40	-0.455927	-2.50052	-0.105458	-1.54234	Glycosyl hydrolases family 17	Glucan endo-1,3-beta-glucosidase 13 OS=Arabidopsis thaliana OX=3702 GN=At5g56590 PE=2 SV=1	glucan endo-1,3-beta-glucosidase 13-like [Chenopodium quinoa]
3.2.1.39	AUR62011152	G-hydrolases-41	0.380612	2.15465	0.198914	1.20722	Glycosyl hydrolases family 17	Glucan endo-1,3-beta-glucosidase 11 OS=Arabidopsis thaliana OX=3702 GN=At1g32860 PE=2 SV=1	glucan endo-1,3-beta-glucosidase 14-like [Chenopodium quinoa]
3.2.1.39	AUR62011329	G-hydrolases-42	0.136951	1.76632	0.293729	0.446045	Glycosyl hydrolases family 17	Glucan endo-1,3-beta-D-glucosidase OS=Olea europaea OX=4146 GN=OLE9 PE=1 SV=1	glucan endo-1,3-beta-D-glucosidase-like [Chenopodium quinoa]
3.2.1.39	AUR62012084	G-hydrolases-43	-1.32711	0.507509	-0.625663	0.633282	Glycosyl hydrolases family 17	Glucan endo-1,3-beta-glucosidase OS=Triticum aestivum OX=4565 GN=GLC1 PE=2 SV=1	glucan endo-1,3-beta-glucosidase-like [Chenopodium quinoa]
3.2.1.39	AUR62012722	G-hydrolases-44	-0.00517643	-2.25875	0.0963825	-0.351308	Glycosyl hydrolases family 17	Glucan endo-1,3-beta-glucosidase 1 OS=Arabidopsis thaliana OX=3702 GN=At1g11820 PE=2 SV=3	glucan endo-1,3-beta-glucosidase 1-like [Chenopodium quinoa]
3.2.1.39	AUR62013335	G-hydrolases-45	0.40922	1.84846	0.209499	1.27639	Glycosyl hydrolases family 17	Glucan endo-1,3-beta-glucosidase 11 OS=Arabidopsis thaliana OX=3702 GN=At1g32860 PE=2 SV=1	glucan endo-1,3-beta-glucosidase 14-like [Chenopodium quinoa]
3.2.1.39	AUR62015193	G-hydrolases-46	-0.42838	-2.4428	-0.130782	-1.20981	Glycosyl hydrolases family 17	Glucan endo-1,3-beta-glucosidase 5 OS=Arabidopsis thaliana OX=3702 GN=At4g31140 PE=2 SV=1	glucan endo-1,3-beta-glucosidase 5-like [Chenopodium quinoa]
3.2.1.39	AUR62015867	G-hydrolases-47	0.904951	1.00085	0.611426	1.39918	Glycosyl hydrolases family 17	Glucan endo-1,3-beta-glucosidase 13 OS=Arabidopsis thaliana OX=3702 GN=At5g56590 PE=2 SV=1	glucan endo-1,3-beta-glucosidase 14-like [Chenopodium quinoa]
3.2.1.39	AUR62016517	G-hydrolases-48	-1.03978	-2.18847	-0.646047	-0.835059	Glycosyl hydrolases family 17	Probable glucan endo-1,3-beta-glucosidase A6 OS=Arabidopsis thaliana OX=3702 GN=A6 PE=2 SV=1	probable glucan endo-1,3-beta-glucosidase A6 [Chenopodium quinoa]
3.2.1.39	AUR62020357	G-hydrolases-49	1.19715	3.00952	-0.278679	2.93374	Glycosyl hydrolases family 17	Glucan endo-1,3-beta-glucosidase 13 OS=Arabidopsis thaliana OX=3702 GN=At5g56590 PE=2 SV=1	glucan endo-1,3-beta-glucosidase 14-like [Chenopodium quinoa]
3.2.1.39	AUR62020690	G-hydrolases-50	0.915707	1.01974	0.692506	0.772036	Glycosyl hydrolases family 17	Glucan endo-1,3-beta-glucosidase 5 OS=Arabidopsis thaliana OX=3702 GN=At4g31140 PE=2 SV=1	glucan endo-1,3-beta-glucosidase 5-like [Chenopodium quinoa]
3.2.1.39	AUR62021388	G-hydrolases-51	-0.728814	-3.25187	-0.236683	-1.39877	Glycosyl hydrolases family 17	Glucan endo-1,3-beta-glucosidase 13 OS=Arabidopsis thaliana OX=3702 GN=At5g56590 PE=2 SV=1	glucan endo-1,3-beta-glucosidase 13-like [Chenopodium quinoa]
3.2.1.39	AUR62021799	G-hydrolases-52	-0.458436	-2.06913	0.222945	-1.75579	Glycosyl hydrolases family 17	Glucan endo-1,3-beta-glucosidase 5 OS=Arabidopsis thaliana OX=3702 GN=At4g31140 PE=2 SV=1	glucan endo-1,3-beta-glucosidase 5-like [Chenopodium quinoa]
3.2.1.39	AUR62021934	G-hydrolases-53	-1.2723	-3.0666	-0.501677	-1.13413	Glycosyl hydrolases family 17	Glucan endo-1,3-beta-glucosidase 1 OS=Arabidopsis thaliana OX=3702 GN=At1g11820 PE=2 SV=3	glucan endo-1,3-beta-glucosidase 1-like [Chenopodium quinoa]
3.2.1.39	AUR62022784	G-hydrolases-54	-0.953724	-2.1846	-0.423188	-1.80871	Glycosyl hydrolases family 17	Glucan endo-1,3-beta-glucosidase 12 OS=Arabidopsis thaliana OX=3702 GN=At4g29360 PE=2 SV=1	glucan endo-1,3-beta-glucosidase 12-like [Chenopodium quinoa]
3.2.1.39	AUR62025325	G-hydrolases-55	-0.0890386	-1.2542	0.334166	-0.178843	Glycosyl hydrolases family 17	Glucan endo-1,3-beta-glucosidase 6 OS=Arabidopsis thaliana OX=3702 GN=At5g58090 PE=2 SV=2	glucan endo-1,3-beta-glucosidase 5-like [Chenopodium quinoa]
3.2.1.39	AUR62027965	G-hydrolases-56	-0.062278	-1.59789	-0.0980223	-0.63597	Glycosyl hydrolases family 17	Glucan endo-1,3-beta-glucosidase 6 OS=Arabidopsis thaliana OX=3702 GN=At5g58090 PE=2 SV=2	glucan endo-1,3-beta-glucosidase 6-like [Chenopodium quinoa]
3.2.1.39	AUR62028035	G-hydrolases-57	1.49954	1.2478	1.06192	1.29033	Glycosyl hydrolases family 17	Glucan endo-1,3-beta-glucosidase 5 OS=Arabidopsis thaliana OX=3702 GN=At4g31140 PE=2 SV=1	glucan endo-1,3-beta-glucosidase 5-like [Chenopodium quinoa]
3.2.1.39	AUR62036187	G-hydrolases-58	-0.551665	1.46471	-0.50268	0.0929678	Glycosyl hydrolases family 17	Glucan endo-1,3-beta-glucosidase 14 OS=Arabidopsis thaliana OX=3702 GN=At2g27500 PE=2 SV=2	glucan endo-1,3-beta-glucosidase 14-like [Chenopodium quinoa]
3.2.1.39	AUR62036874	G-hydrolases-59	-2.29797	2.88349	-0.188755	0.229442	Glycosyl hydrolases family 17	Glucan endo-1,3-beta-glucosidase OS=Vitis vinifera OX=29760 GN=VIT_06s0061g00120 PE=1 SV=2	glucan endo-1,3-beta-glucosidase-like [Chenopodium quinoa]
3.2.1.39	AUR62039380	G-hydrolases-60	-0.350518	1.58582	-0.143964	1.98563	Glycosyl hydrolases family 17	Glucan endo-1,3-beta-glucosidase OS=Triticum aestivum OX=4565 GN=GLC1 PE=2 SV=1	glucan endo-1,3-beta-glucosidase-like [Chenopodium quinoa]
3.2.1.39	AUR62039855	G-hydrolases-61	-1.29251	-2.26779	-1.93962	-2.45543	Glycosyl hydrolases family 17	Glucan endo-1,3-beta-glucosidase OS=Vitis vinifera OX=29760 GN=VIT_06s0061g00120 PE=1 SV=2	glucan endo-1,3-beta-glucosidase-like [Chenopodium quinoa]
3.2.1.39	AUR62039856	G-hydrolases-62	-1.05245	-1.88458	-0.417162	-1.40055	Glycosyl hydrolases family 17	Glucan endo-1,3-beta-glucosidase OS=Vitis vinifera OX=29760 GN=VIT_06s0061g00120 PE=1 SV=2	glucan endo-1,3-beta-glucosidase-like [Chenopodium quinoa]
3.2.1.39	AUR62039857	G-hydrolases-63	-1.5373	3.43501	-0.800218	0.617622	Glycosyl hydrolases family 17	Glucan endo-1,3-beta-glucosidase OS=Vitis vinifera OX=29760 GN=VIT_06s0061g00120 PE=1 SV=2	glucan endo-1,3-beta-glucosidase-like [Chenopodium quinoa]
3.2.1.39	AUR62043172	G-hydrolases-64	-1.48082	2.90797	0.110528	0.844841	Glycosyl hydrolases family 17	Glucan endo-1,3-beta-glucosidase OS=Vitis vinifera OX=29760 GN=VIT_06s0061g00120 PE=1 SV=2	glucan endo-1,3-beta-glucosidase-like [Chenopodium quinoa]
3.2.1.39	AUR62043338	G-hydrolases-65	-0.797271	-2.66507	-1.17966	-1.46574	Glycosyl hydrolases family 17	Glucan endo-1,3-beta-glucosidase 12 OS=Arabidopsis thaliana OX=3702 GN=At4g29360 PE=2 SV=1	glucan endo-1,3-beta-glucosidase 12-like [Chenopodium quinoa]
3.2.1.39	AUR62043470	G-hydrolases-66	-1.29819	-2.85	-0.525935	-1.46103	Glycosyl hydrolases family 17	Glucan endo-1,3-beta-glucosidase 1 OS=Arabidopsis thaliana OX=3702 GN=At1g11820 PE=2 SV=3	glucan endo-1,3-beta-glucosidase 1-like [Chenopodium quinoa]
3.2.1.39	Chenopodium_quinoa_newGene_14179	G-hydrolases-67	0.709503	0.70768	0.462097	1.59209	Glycosyl hydrolases family 17	Glucan endo-1,3-beta-glucosidase 11 OS=Arabidopsis thaliana OX=3702 GN=At1g32860 PE=2 SV=1	glucan endo-1,3-beta-glucosidase 11-like [Chenopodium quinoa]
3.2.1.39	AUR62003110	X8-01	-0.0959322	-1.83632	-0.688017	-0.549815	X8 domain	PLASMODESMATA CALLOSE-BINDING PROTEIN 2 OS=Arabidopsis thaliana OX=3702 GN=PDCB2 PE=1 SV=1	PLASMODESMATA CALLOSE-BINDING PROTEIN 4-like [Chenopodium quinoa]
3.2.1.39	AUR62029091	X8-02	-2.6157	1.53159	-1.03046	2.23305	X8 domain	--	glucan endo-1,3-beta-glucosidase 1-like isoform X2 [Chenopodium quinoa]
3.2.1.39	AUR62035792	X8-03	1.5285	0.585706	0.470218	1.36067	X8 domain	Glucan endo-1,3-beta-glucosidase 1 OS=Arabidopsis thaliana OX=3702 GN=At1g11820 PE=2 SV=3	loricrin-like [Chenopodium quinoa]
3.2.1.39	AUR62015022	X8-04	-1.27065	0.393186	-0.858165	0.0886139	X8 domain	--	glucan endo-1,3-beta-glucosidase 4-like [Chenopodium quinoa]
3.2.1.39	AUR62021573	X8-05	0.535667	0.676527	0.759856	1.17903	X8 domain	PLASMODESMATA CALLOSE-BINDING PROTEIN 2 OS=Arabidopsis thaliana OX=3702 GN=PDCB2 PE=1 SV=1	PLASMODESMATA CALLOSE-BINDING PROTEIN 3-like [Chenopodium quinoa]
3.2.1.39	Chenopodium_quinoa_newGene_6564	X8-06	-1.1982	-3.06655	-0.749627	--	X8 domain	PLASMODESMATA CALLOSE-BINDING PROTEIN 3 OS=Arabidopsis thaliana OX=3702 GN=PDCB3 PE=1 SV=1	PLASMODESMATA CALLOSE-BINDING PROTEIN 3-like [Chenopodium quinoa]
3.2.1.4	AUR62000202	G-hydrolases-68	0.513252	-3.29429	0.134175	-3.21488	Glycosyl hydrolase family 9	Endoglucanase 8 OS=Arabidopsis thaliana OX=3702 GN=CEL1 PE=2 SV=1	endoglucanase 8-like [Chenopodium quinoa]
3.2.1.4	AUR62000254	G-hydrolases-69	-0.931237	5.14415	-0.230408	--	Glycosyl hydrolase family 9	Endoglucanase 12 OS=Oryza sativa subsp. japonica OX=39947 GN=GLU3 PE=2 SV=2	endoglucanase 12-like [Chenopodium quinoa]
3.2.1.4	AUR62005512	G-hydrolases-70	1.69498	1.37459	0.72522	0.0425496	Cellulase (glycosyl hydrolase family 5)	Glycosyl hydrolase 5 family protein OS=Chamaecyparis obtusa OX=13415 PE=1 SV=1	uncharacterized protein LOC110709812 [Chenopodium quinoa]
3.2.1.4	AUR62006550	G-hydrolases-71	0.237284	-3.34705	0.0414576	-3.0356	Glycosyl hydrolase family 9	Endoglucanase 8 OS=Arabidopsis thaliana OX=3702 GN=CEL1 PE=2 SV=1	LOW QUALITY PROTEIN: endoglucanase 8-like [Chenopodium quinoa]
3.2.1.4	AUR62006601	G-hydrolases-72	-1.28428	2.22604	--	-0.171369	Glycosyl hydrolase family 9	Endoglucanase 12 OS=Oryza sativa subsp. japonica OX=39947 GN=GLU3 PE=2 SV=2	endoglucanase 12-like [Chenopodium quinoa]
3.2.1.4	AUR62008698	G-hydrolases-73	0.517554	-1.83496	--	--	Glycosyl hydrolase family 9	Endoglucanase 17 OS=Arabidopsis thaliana OX=3702 GN=At4g02290 PE=2 SV=1	endoglucanase 17-like [Chenopodium quinoa]
3.2.1.4	AUR62010833	G-hydrolases-74	1.74957	-0.81084	1.12128	-0.325238	Glycosyl hydrolase family 9	Endoglucanase 6 OS=Arabidopsis thaliana OX=3702 GN=At1g64390 PE=2 SV=2	endoglucanase 6-like [Chenopodium quinoa]
3.2.1.4	AUR62019831	G-hydrolases-75	1.11084	-2.35589	1.29954	-0.970435	Glycosyl hydrolase family 9	Endoglucanase 6 OS=Arabidopsis thaliana OX=3702 GN=At1g64390 PE=2 SV=2	endoglucanase 6-like [Chenopodium quinoa]
3.2.1.4	AUR62024230	G-hydrolases-76	1.24753	0.152931	0.809512	0.369375	Cellulase (glycosyl hydrolase family 5)	Glycosyl hydrolase 5 family protein OS=Chamaecyparis obtusa OX=13415 PE=1 SV=1	uncharacterized protein LOC110712600 [Chenopodium quinoa]
3.2.1.4	AUR62033840	G-hydrolases-77	0.503492	-1.16333	0.260577	-0.848284	Glycosyl hydrolase family 9	Endoglucanase 10 OS=Arabidopsis thaliana OX=3702 GN=At1g75680 PE=2 SV=2	endoglucanase 2-like [Chenopodium quinoa]
3.2.1.4	AUR62010836	F-box-02	-0.0659154	1.33493	-0.175694	0.258936	Leucine Rich repeats (2 copies)	--	uncharacterized protein LOC110719677 [Chenopodium quinoa]
3.2.1.4	AUR62019834	F-box-03	0.129004	1.68038	0.376488	0.378252	Leucine Rich repeats (2 copies)	--	F-box/LRR-repeat protein 13-like [Chenopodium quinoa]
3.2.1.4	AUR62011597	Un-protein	-1.04769	-3.72871	-1.49001	-0.529697	--	--	uncharacterized protein LOC110698719 [Chenopodium quinoa]
3.2.1.4	Chenopodium_quinoa_newGene_15410	Un-protein	0.895925	1.51121	0.854884	0.877944	Domain of unknown function (DUF4283)	--	uncharacterized protein LOC110719113 [Chenopodium quinoa]
5.3.1.9	AUR62007425	P-isomerase-01	0.585847	1.06479	1.05327	0.687694	Phosphoglucose isomerase	Glucose-6-phosphate isomerase, cytosolic OS=Spinacia oleracea OX=3562 GN=PGIC PE=2 SV=2	glucose-6-phosphate isomerase, cytosolic-like isoform X1 [Chenopodium quinoa]
5.3.1.9	AUR62019023	P-isomerase-02	-0.358483	-1.28354	-0.139941	-1.31157	Phosphoglucose isomerase	Glucose-6-phosphate isomerase 1, chloroplastic OS=Arabidopsis thaliana OX=3702 GN=PGI1 PE=1 SV=1	glucose-6-phosphate isomerase 1, chloroplastic-like [Chenopodium quinoa]
5.3.1.9	AUR62033887	OSB3	-0.126336	-1.71518	-0.144302	-0.389644	--	Protein OSB3, chloroplastic/mitochondrial OS=Arabidopsis thaliana OX=3702 GN=OSB3 PE=2 SV=1	protein OSB3, chloroplastic/mitochondrial-like isoform X3 [Chenopodium quinoa]
2.4.1.14	AUR62011194	G-transferases-01	0.928016	1.41479	0.626491	0.54097	Glycosyl transferases group 1	Probable sucrose-phosphate synthase OS=Beta vulgaris OX=161934 GN=SPS PE=2 SV=1	probable sucrose-phosphate synthase isoform X1 [Chenopodium quinoa]
2.4.1.14	AUR62013294	G-transferases-02	0.763732	1.65942	0.574799	0.694306	Glycosyl transferases group 1	Probable sucrose-phosphate synthase OS=Beta vulgaris OX=161934 GN=SPS PE=2 SV=1	probable sucrose-phosphate synthase [Chenopodium quinoa]
2.4.1.13	AUR62004763	Su-synthase-01	0.705418	1.11435	0.482277	0.276364	Sucrose synthase	Sucrose synthase 6 OS=Arabidopsis thaliana OX=3702 GN=SUS6 PE=1 SV=1	sucrose synthase 5-like isoform X3 [Chenopodium quinoa]
2.4.1.13	AUR62008699	Su-synthase-02	2.08343	3.82521	1.73357	1.52578	Sucrose synthase	Sucrose synthase (Fragment) OS=Beta vulgaris OX=161934 GN=SS1 PE=2 SV=1	sucrose synthase [Chenopodium quinoa]
2.4.1.13	AUR62025310	Su-synthase-03	0.84262	3.02537	0.424184	2.52062	Sucrose synthase	Sucrose synthase OS=Glycine max OX=3847 GN=SS PE=1 SV=2	sucrose synthase-like [Chenopodium quinoa]
2.4.1.13	AUR62025532	Su-synthase-04	2.03998	4.61807	1.89521	2.4986	Sucrose synthase	Sucrose synthase (Fragment) OS=Beta vulgaris OX=161934 GN=SS1 PE=2 SV=1	sucrose synthase-like [Chenopodium quinoa]
2.4.1.13	AUR62026544	Su-synthase-05	-0.26153	-1.79195	0.373212	-1.75185	NB-ARC domain	Disease resistance protein RPV1 OS=Vitis rotundifolia OX=103349 GN=RPV1 PE=1 SV=1	disease resistance protein TAO1-like isoform X2 [Chenopodium quinoa]
2.4.1.13	AUR62028315	Su-synthase-06	4.28656	6.3997	2.36711	4.99348	Sucrose synthase	Sucrose synthase OS=Glycine max OX=3847 GN=SS PE=1 SV=2	sucrose synthase [Chenopodium quinoa]
5.4.2.2	AUR62016062	phosphoglucomutase	-0.153076	-0.789684	-0.305865	-1.04217	Phosphoglucomutase/phosphomannomutase, alpha/beta/alpha domain III	Phosphoglucomutase, chloroplastic OS=Pisum sativum OX=3888 GN=PGMP PE=2 SV=1	phosphoglucomutase, chloroplastic-like [Chenopodium quinoa]
2.4.1.15	AUR62002092	G-transferases-03	-0.752982	1.1826	0.0445912	0.356062	Glycosyltransferase family 20	Probable alpha,alpha-trehalose-phosphate synthase [UDP-forming] 7 OS=Arabidopsis thaliana OX=3702 GN=TPS7 PE=1 SV=1	probable alpha,alpha-trehalose-phosphate synthase [UDP-forming] 7 [Chenopodium quinoa]
2.4.1.15	AUR62008239	G-transferases-04	-0.193528	1.72468	-0.0435817	0.809483	Glycosyltransferase family 20	Probable alpha,alpha-trehalose-phosphate synthase [UDP-forming] 9 OS=Arabidopsis thaliana OX=3702 GN=TPS9 PE=2 SV=1	probable alpha,alpha-trehalose-phosphate synthase [UDP-forming] 9 isoform X2 [Chenopodium quinoa]
2.4.1.15	AUR62013953	G-transferases-05	1.20291	2.10889	0.709081	1.06304	Glycosyltransferase family 20	Alpha,alpha-trehalose-phosphate synthase [UDP-forming] 1 OS=Arabidopsis thaliana OX=3702 GN=TPS1 PE=1 SV=1	alpha,alpha-trehalose-phosphate synthase [UDP-forming] 1-like [Chenopodium quinoa]
2.4.1.15	AUR62014005	G-transferases-06	1.0192	1.19033	0.576621	0.328068	Glycosyltransferase family 20	Probable alpha,alpha-trehalose-phosphate synthase [UDP-forming] 9 OS=Arabidopsis thaliana OX=3702 GN=TPS9 PE=2 SV=1	LOW QUALITY PROTEIN: probable alpha,alpha-trehalose-phosphate synthase [UDP-forming] 9 [Chenopodium quinoa]
2.4.1.15	AUR62030991	G-transferases-07	-0.20406	1.60951	0.0111124	1.07068	Glycosyltransferase family 20	Probable alpha,alpha-trehalose-phosphate synthase [UDP-forming] 9 OS=Arabidopsis thaliana OX=3702 GN=TPS9 PE=2 SV=1	probable alpha,alpha-trehalose-phosphate synthase [UDP-forming] 9 isoform X1 [Chenopodium quinoa]
2.4.1.15	AUR62040284	G-transferases-08	1.65466	1.38386	0.381329	-0.423908	Glycosyltransferase family 20	Probable alpha,alpha-trehalose-phosphate synthase [UDP-forming] 9 OS=Arabidopsis thaliana OX=3702 GN=TPS9 PE=2 SV=1	alpha,alpha-trehalose-phosphate synthase [UDP-forming] 5-like [Chenopodium quinoa]
3.6.1.9	AUR62027493	N- pyrophosphatase-01	-0.128534	-2.72891	0.0681016	-0.94847	Type I phosphodiesterase / nucleotide pyrophosphatase	--	ectonucleotide pyrophosphatase/phosphodiesterase family member 3-like [Chenopodium quinoa]
3.6.1.9	AUR62033988	N- pyrophosphatase-02	0.483181	-1.17281	0.384922	-0.0101127	Type I phosphodiesterase / nucleotide pyrophosphatase	--	ectonucleotide pyrophosphatase/phosphodiesterase family member 3-like [Chenopodium quinoa]
2.7.7.27	AUR62011298	N-transferase-01	1.25802	2.33573	0.923598	0.905746	Nucleotidyl transferase	Glucose-1-phosphate adenylyltransferase large subunit 1 (Fragment) OS=Solanum tuberosum OX=4113 GN=AGPS1 PE=1 SV=1	glucose-1-phosphate adenylyltransferase large subunit 1-like [Chenopodium quinoa]
2.7.7.27	AUR62016760	N-transferase-02	0.367952	0.726446	1.06838	-1.27305	Nucleotidyl transferase	Glucose-1-phosphate adenylyltransferase large subunit 1 (Fragment) OS=Solanum tuberosum OX=4113 GN=AGPS1 PE=1 SV=1	glucose-1-phosphate adenylyltransferase large subunit 1-like [Chenopodium quinoa]
2.7.7.27	AUR62025100	N-transferase-03	-0.99143	-2.17432	-0.733596	-0.939119	Nucleotidyl transferase	Glucose-1-phosphate adenylyltransferase small subunit, chloroplastic OS=Brassica napus OX=3708 GN=AGPS1 PE=2 SV=1	glucose-1-phosphate adenylyltransferase small subunit, chloroplastic/amyloplastic-like [Chenopodium quinoa]
2.7.7.27	AUR62034675	N-transferase-04	-0.615589	-2.64765	-0.597933	-1.47768	Nucleotidyl transferase	Glucose-1-phosphate adenylyltransferase large subunit 1, chloroplastic OS=Arabidopsis thaliana OX=3702 GN=ADG2 PE=1 SV=3	glucose-1-phosphate adenylyltransferase large subunit 3, chloroplastic/amyloplastic-like [Chenopodium quinoa]
2.7.7.27	AUR62037153	N-transferase-05	-0.28572	-1.47935	-0.146797	-1.14404	Nucleotidyl transferase	Glucose-1-phosphate adenylyltransferase small subunit, chloroplastic OS=Brassica napus OX=3708 GN=AGPS1 PE=2 SV=1	glucose-1-phosphate adenylyltransferase small subunit, chloroplastic/amyloplastic [Chenopodium quinoa]
3.6.1.21	AUR62017343	nudix hydrolase 14	0.173508	-1.33172	0.114834	-0.725307	NUDIX domain	Nudix hydrolase 14, chloroplastic OS=Arabidopsis thaliana OX=3702 GN=NUDT14 PE=1 SV=2	nudix hydrolase 14, chloroplastic-like [Chenopodium quinoa]
2.4.1.21	AUR62038689	PTST	-0.714891	-1.45206	-0.626745	-0.914642	Glycogen recognition site of AMP-activated protein kinase	Protein PTST, chloroplastic OS=Arabidopsis thaliana OX=3702 GN=PTST PE=1 SV=1	protein PTST, chloroplastic-like isoform X2 [Chenopodium quinoa]
2.4.1.242	AUR62035617	G-B-S-synthase-01	2.20072	8.50601	--	6.39552	Starch synthase catalytic domain	Granule-bound starch synthase 1, chloroplastic/amyloplastic OS=Antirrhinum majus OX=4151 GN=WAXY PE=2 SV=1	granule-bound starch synthase 1, chloroplastic/amyloplastic-like [Chenopodium quinoa]
2.4.1.242	Chenopodium_quinoa_newGene_5814	G-B-S-synthase-02	0.546473	-1.55054	0.190614	0.192029	Starch synthase catalytic domain	Granule-bound starch synthase 1, chloroplastic/amyloplastic OS=Manihot esculenta OX=3983 GN=WAXY PE=2 SV=1	granule-bound starch synthase 1, chloroplastic/amyloplastic-like [Chenopodium quinoa]
2.4.1.1	AUR62003308	4-A-glucanotransferase-01	-0.60513	-2.45009	-0.127937	-1.39166	4-alpha-glucanotransferase	4-alpha-glucanotransferase, chloroplastic/amyloplastic OS=Solanum tuberosum OX=4113 GN=DPEP PE=1 SV=1	4-alpha-glucanotransferase, chloroplastic/amyloplastic-like [Chenopodium quinoa]
2.4.1.1	AUR62003308	4-A-glucanotransferase-02	-0.60513	-2.45009	-0.127937	-1.39166	4-alpha-glucanotransferase	4-alpha-glucanotransferase, chloroplastic/amyloplastic OS=Solanum tuberosum OX=4113 GN=DPEP PE=1 SV=1	4-alpha-glucanotransferase, chloroplastic/amyloplastic-like [Chenopodium quinoa]
2.4.1.1	AUR62016277	4-A-glucanotransferase-03	-0.830113	-2.70254	0.139025	-1.6812	4-alpha-glucanotransferase	4-alpha-glucanotransferase, chloroplastic/amyloplastic OS=Solanum tuberosum OX=4113 GN=DPEP PE=1 SV=1	4-alpha-glucanotransferase, chloroplastic/amyloplastic-like [Chenopodium quinoa]
2.4.1.1	AUR62018414	4-A-glucanotransferase-04	0.269838	-1.59761	0.293359	-1.76133	4-alpha-glucanotransferase	4-alpha-glucanotransferase DPE2 OS=Arabidopsis thaliana OX=3702 GN=DPE2 PE=1 SV=1	4-alpha-glucanotransferase DPE2-like [Chenopodium quinoa]
2.4.1.1	AUR62021029	4-A-glucanotransferase-05	-0.280119	-1.21843	0.236774	-1.91612	4-alpha-glucanotransferase	4-alpha-glucanotransferase DPE2 OS=Arabidopsis thaliana OX=3702 GN=DPE2 PE=1 SV=1	4-alpha-glucanotransferase DPE2-like [Chenopodium quinoa]
2.4.1.1	AUR62028896	ACR4	-0.675257	-1.36227	-0.299813	-0.953314	ACT domain	ACT domain-containing protein ACR4 OS=Arabidopsis thaliana OX=3702 GN=ACR4 PE=2 SV=1	ACT domain-containing protein ACR4-like [Chenopodium quinoa]
2.4.1.1	AUR62005657	ACR4	-0.402725	-0.236578	-0.222638	-1.00361	ACT domain	ACT domain-containing protein ACR4 OS=Arabidopsis thaliana OX=3702 GN=ACR4 PE=2 SV=1	ACT domain-containing protein ACR4-like [Chenopodium quinoa]
2.4.1.1	AUR62007939	C-phosphorylase-01	-0.129397	0.0221648	0.0227202	-1.27371	Carbohydrate phosphorylase	Alpha-1,4 glucan phosphorylase L-2 isozyme, chloroplastic/amyloplastic OS=Solanum tuberosum OX=4113 GN=STP-1 PE=1 SV=1	alpha-1,4 glucan phosphorylase L-2 isozyme, chloroplastic/amyloplastic-like isoform X1 [Chenopodium quinoa]
2.4.1.1	AUR62001699	C-phosphorylase-02	0.861457	1.87206	0.819468	1.273	Carbohydrate phosphorylase	Alpha-glucan phosphorylase, H isozyme OS=Solanum tuberosum OX=4113 PE=1 SV=1	alpha-glucan phosphorylase 2, cytosolic [Chenopodium quinoa]
2.4.1.1	AUR62003120	C-phosphorylase-03	-0.495816	-0.783423	-0.126324	-1.42674	Carbohydrate phosphorylase	Alpha-1,4 glucan phosphorylase L-2 isozyme, chloroplastic/amyloplastic OS=Solanum tuberosum OX=4113 GN=STP-1 PE=1 SV=1	alpha-1,4 glucan phosphorylase L-2 isozyme, chloroplastic/amyloplastic-like isoform X1 [Chenopodium quinoa]
2.4.1.1	AUR62042432	C-phosphorylase-04	-0.517343	-1.70609	0.366269	-0.537562	Carbohydrate phosphorylase	Alpha-1,4 glucan phosphorylase L isozyme, chloroplastic/amyloplastic OS=Ipomoea batatas OX=4120 PE=2 SV=1	alpha-1,4 glucan phosphorylase L isozyme, chloroplastic/amyloplastic-like [Chenopodium quinoa]
3.1.3.12	AUR62013953	G-transferases-09	1.20291	2.10889	0.709081	1.06304	Glycosyltransferase family 20	Alpha,alpha-trehalose-phosphate synthase [UDP-forming] 1 OS=Arabidopsis thaliana OX=3702 GN=TPS1 PE=1 SV=1	alpha,alpha-trehalose-phosphate synthase [UDP-forming] 1-like [Chenopodium quinoa]
3.1.3.12	AUR62002092	G-transferases-10	-0.752982	1.1826	0.0445912	0.356062	Glycosyltransferase family 20	Probable alpha,alpha-trehalose-phosphate synthase [UDP-forming] 7 OS=Arabidopsis thaliana OX=3702 GN=TPS7 PE=1 SV=1	probable alpha,alpha-trehalose-phosphate synthase [UDP-forming] 7 [Chenopodium quinoa]
3.1.3.12	AUR62030991	G-transferases-11	-0.20406	1.60951	0.0111124	1.07068	Glycosyltransferase family 20	Probable alpha,alpha-trehalose-phosphate synthase [UDP-forming] 9 OS=Arabidopsis thaliana OX=3702 GN=TPS9 PE=2 SV=1	probable alpha,alpha-trehalose-phosphate synthase [UDP-forming] 9 isoform X1 [Chenopodium quinoa]
3.1.3.12	AUR62008239	G-transferases-12	-0.193528	1.72468	-0.0435817	0.809483	Glycosyltransferase family 20	Probable alpha,alpha-trehalose-phosphate synthase [UDP-forming] 9 OS=Arabidopsis thaliana OX=3702 GN=TPS9 PE=2 SV=1	probable alpha,alpha-trehalose-phosphate synthase [UDP-forming] 9 isoform X2 [Chenopodium quinoa]
3.1.3.12	AUR62013953	G-transferases-13	1.20291	2.10889	0.709081	1.06304	Glycosyltransferase family 20	Alpha,alpha-trehalose-phosphate synthase [UDP-forming] 1 OS=Arabidopsis thaliana OX=3702 GN=TPS1 PE=1 SV=1	alpha,alpha-trehalose-phosphate synthase [UDP-forming] 1-like [Chenopodium quinoa]
3.1.3.12	AUR62040284	G-transferases-14	1.65466	1.38386	0.381329	-0.423908	Glycosyltransferase family 20	Probable alpha,alpha-trehalose-phosphate synthase [UDP-forming] 9 OS=Arabidopsis thaliana OX=3702 GN=TPS9 PE=2 SV=1	alpha,alpha-trehalose-phosphate synthase [UDP-forming] 5-like [Chenopodium quinoa]
3.1.3.12	AUR62014005	G-transferases-15	1.0192	1.19033	0.576621	0.328068	Glycosyltransferase family 20	Probable alpha,alpha-trehalose-phosphate synthase [UDP-forming] 9 OS=Arabidopsis thaliana OX=3702 GN=TPS9 PE=2 SV=1	LOW QUALITY PROTEIN: probable alpha,alpha-trehalose-phosphate synthase [UDP-forming] 9 [Chenopodium quinoa]
3.1.3.12	AUR62016027	LIM01	0.727025	1.38962	0.778243	0.739599	LIM-domain binding protein	Probable transcriptional regulator SLK2 OS=Arabidopsis thaliana OX=3702 GN=SLK2 PE=1 SV=1	probable transcriptional regulator SLK2 [Chenopodium quinoa]
3.1.3.12	AUR62021232	LIM02	0.682512	1.4725	0.76514	0.71275	LIM-domain binding protein	Probable transcriptional regulator SLK2 OS=Arabidopsis thaliana OX=3702 GN=SLK2 PE=1 SV=1	probable transcriptional regulator SLK2 [Chenopodium quinoa]
3.1.3.12	AUR62015517	T-phosphatase-01	-0.368135	1.60709	0.743977	1.50141	Trehalose-phosphatase	Trehalose-phosphate phosphatase A OS=Arabidopsis thaliana OX=3702 GN=TPPA PE=1 SV=1	trehalose-phosphate phosphatase A-like [Chenopodium quinoa]
3.1.3.12	AUR62018916	T-phosphatase-02	-0.124516	-1.00086	0.292173	0.291419	Trehalose-phosphatase	Probable trehalose-phosphate phosphatase D OS=Arabidopsis thaliana OX=3702 GN=TPPD PE=2 SV=1	probable trehalose-phosphate phosphatase D [Chenopodium quinoa]
3.1.3.12	AUR62004476	T-phosphatase-03	-0.535402	-1.87302	-0.657467	-0.177474	Trehalose-phosphatase	Probable trehalose-phosphate phosphatase H OS=Arabidopsis thaliana OX=3702 GN=TPPH PE=2 SV=1	probable trehalose-phosphate phosphatase C isoform X1 [Chenopodium quinoa]
3.1.3.12	AUR62002023	T-phosphatase-04	1.19006	0.96731	1.03042	1.84537	Trehalose-phosphatase	Probable trehalose-phosphate phosphatase J OS=Arabidopsis thaliana OX=3702 GN=TPPJ PE=1 SV=1	probable trehalose-phosphate phosphatase I [Chenopodium quinoa]
3.1.3.12	AUR62008216	T-phosphatase-05	-0.13605	-1.05678	-0.537232	-0.442368	Tetratricopeptide repeat	Protein KINESIN LIGHT CHAIN-RELATED 3 OS=Arabidopsis thaliana OX=3702 GN=KLCR3 PE=2 SV=1	protein KINESIN LIGHT CHAIN-RELATED 3-like [Chenopodium quinoa]
3.1.3.12	AUR62023475	T-phosphatase-06	-1.13505	-4.28162	-1.69407	-0.179951	Trehalose-phosphatase	Probable trehalose-phosphate phosphatase H OS=Arabidopsis thaliana OX=3702 GN=TPPH PE=2 SV=1	probable trehalose-phosphate phosphatase C [Chenopodium quinoa]
3.1.3.12	AUR62027730	T-phosphatase-07	-0.386095	-1.02691	-0.366735	0.94652	Trehalose-phosphatase	Probable trehalose-phosphate phosphatase D OS=Arabidopsis thaliana OX=3702 GN=TPPD PE=2 SV=1	probable trehalose-phosphate phosphatase D [Chenopodium quinoa]
3.1.3.12	AUR62030969	T-phosphatase-08	-0.934307	-1.02346	-1.05886	-0.517053	Tetratricopeptide repeat	Protein KINESIN LIGHT CHAIN-RELATED 3 OS=Arabidopsis thaliana OX=3702 GN=KLCR3 PE=2 SV=1	protein KINESIN LIGHT CHAIN-RELATED 3-like [Chenopodium quinoa]
3.1.3.12	AUR62039934	T-phosphatase-09	0.625686	1.84644	0.824629	1.80481	Trehalose-phosphatase	Probable trehalose-phosphate phosphatase G OS=Arabidopsis thaliana OX=3702 GN=TPPG PE=2 SV=1	probable trehalose-phosphate phosphatase F isoform X1 [Chenopodium quinoa]
3.2.1.68	AUR62018975	isoamylase-01	1.15081	2.01776	1.3065	0.973913	Carbohydrate-binding module 48 (Isoamylase N-terminal domain)	Isoamylase 3, chloroplastic OS=Arabidopsis thaliana OX=3702 GN=ISA3 PE=1 SV=2	isoamylase 3, chloroplastic-like [Chenopodium quinoa]
3.2.1.68	AUR62030031	isoamylase-02	0.263074	-1.46786	0.0349168	-0.582915	Carbohydrate-binding module 48 (Isoamylase N-terminal domain)	Isoamylase 2, chloroplastic OS=Arabidopsis thaliana OX=3702 GN=ISA2 PE=1 SV=2	isoamylase 2, chloroplastic-like [Chenopodium quinoa]
3.2.1.68	AUR62029688	Pullulanase-01	0.171425	1.11607	0.0624146	1.09659	Domain of unknown function (DUF3372)	Pullulanase 1, chloroplastic OS=Arabidopsis thaliana OX=3702 GN=PU1 PE=1 SV=2	pullulanase 1, chloroplastic-like [Chenopodium quinoa]
3.2.1.68	AUR62006360	Pullulanase-02	0.0230521	-1.38484	0.258123	-0.52495	Domain of unknown function (DUF3372)	Pullulanase 1, chloroplastic OS=Arabidopsis thaliana OX=3702 GN=PU1 PE=1 SV=2	pullulanase 1, chloroplastic-like [Chenopodium quinoa]
3.2.1.68	AUR62027816	isoamylase-03	1.4763	2.08864	1.31255	0.814376	Alpha amylase, catalytic domain	Isoamylase 3, chloroplastic OS=Arabidopsis thaliana OX=3702 GN=ISA3 PE=1 SV=2	isoamylase 3, chloroplastic-like [Chenopodium quinoa]
3.2.1.68	AUR62033250	isoamylase-04	--	-1.45692	--	-1.55049	Alpha amylase, catalytic domain	Isoamylase 1, chloroplastic OS=Oryza sativa subsp. japonica OX=39947 GN=ISA1 PE=1 SV=1	LOW QUALITY PROTEIN: isoamylase 1, chloroplastic-like [Chenopodium quinoa]
2.4.1.25	AUR62003308	4-A-glucanotransferase-06	-0.60513	-2.45009	-0.127937	-1.39166	4-alpha-glucanotransferase	4-alpha-glucanotransferase, chloroplastic/amyloplastic OS=Solanum tuberosum OX=4113 GN=DPEP PE=1 SV=1	4-alpha-glucanotransferase, chloroplastic/amyloplastic-like [Chenopodium quinoa]
2.4.1.25	AUR62016277	4-A-glucanotransferase-07	-0.830113	-2.70254	0.139025	-1.6812	4-alpha-glucanotransferase	4-alpha-glucanotransferase, chloroplastic/amyloplastic OS=Solanum tuberosum OX=4113 GN=DPEP PE=1 SV=1	4-alpha-glucanotransferase, chloroplastic/amyloplastic-like [Chenopodium quinoa]
2.4.1.25	AUR62018414	4-A-glucanotransferase-08	0.269838	-1.59761	0.293359	-1.76133	4-alpha-glucanotransferase	4-alpha-glucanotransferase DPE2 OS=Arabidopsis thaliana OX=3702 GN=DPE2 PE=1 SV=1	4-alpha-glucanotransferase DPE2-like [Chenopodium quinoa]
2.4.1.25	AUR62021029	4-A-glucanotransferase-09	-0.280119	-1.21843	0.236774	-1.91612	4-alpha-glucanotransferase	4-alpha-glucanotransferase DPE2 OS=Arabidopsis thaliana OX=3702 GN=DPE2 PE=1 SV=1	4-alpha-glucanotransferase DPE2-like [Chenopodium quinoa]
3.2.1.2	AUR62000148	G-hydrolases-78	1.89221	2.44692	1.66945	2.46294	Glycosyl hydrolase family 14	Beta-amylase 1, chloroplastic OS=Arabidopsis thaliana OX=3702 GN=BAM1 PE=1 SV=1	beta-amylase 1, chloroplastic-like [Chenopodium quinoa]
3.2.1.2	AUR62019329	G-hydrolases-79	1.16269	1.78931	1.01911	1.58828	Glycosyl hydrolase family 14	Beta-amylase 1, chloroplastic OS=Arabidopsis thaliana OX=3702 GN=BAM1 PE=1 SV=1	beta-amylase 1, chloroplastic-like [Chenopodium quinoa]
3.2.1.2	AUR62022556	G-hydrolases-80	0.210499	1.03252	0.503091	-0.168436	Glycosyl hydrolase family 14	Beta-amylase 7 OS=Arabidopsis thaliana OX=3702 GN=BAM7 PE=1 SV=2	beta-amylase 7-like isoform X1 [Chenopodium quinoa]
3.2.1.2	AUR62007199	G-hydrolases-81	-1.04827	-1.28419	-1.38265	-1.32622	Glycosyl hydrolase family 14	Beta-amylase 3, chloroplastic OS=Arabidopsis thaliana OX=3702 GN=BAM3 PE=1 SV=3	beta-amylase 3, chloroplastic-like [Chenopodium quinoa]
3.2.1.2	AUR62015174	G-hydrolases-82	0.0965318	-1.02657	-0.437269	-1.6187	Glycosyl hydrolase family 14	Beta-amylase OS=Glycine max OX=3847 GN=BMY1 PE=1 SV=3	beta-amylase-like [Chenopodium quinoa]
3.2.1.2	AUR62008831	pfkB-11	-0.474474	-2.80188	-0.444049	-1.19819	pfkB family carbohydrate kinase	--	ribokinase-like isoform X1 [Chenopodium quinoa]
3.2.1.2	AUR62008832	pfkB-12	-0.0879351	-1.42663	-0.294204	-0.60196	pfkB family carbohydrate kinase	Probable fructokinase-3 OS=Arabidopsis thaliana OX=3702 GN=At1g06020 PE=2 SV=1	ribokinase-like isoform X2 [Chenopodium quinoa]
3.2.1.2	AUR62025409	pfkB-13	-0.225873	-1.24867	-0.304755	-0.553289	pfkB family carbohydrate kinase	--	ribokinase [Vigna unguiculata]
3.2.1.1	AUR62003328	S.5	-1.82771	-1.14098	-1.3387	-0.71167	Protein kinase domain	Probable L-type lectin-domain containing receptor kinase S.5 OS=Arabidopsis thaliana OX=3702 GN=LECRKS5 PE=2 SV=1	probable L-type lectin-domain containing receptor kinase S.5 [Chenopodium quinoa]
3.2.1.1	AUR62021283	S/T-P-kinase-01	-0.579634	2.24567	-0.58799	0.445454	Protein kinase domain	Receptor-like serine/threonine-protein kinase At2g45590 OS=Arabidopsis thaliana OX=3702 GN=At2g45590 PE=2 SV=1	receptor-like serine/threonine-protein kinase At2g45590 [Chenopodium quinoa]
3.2.1.1	Chenopodium_quinoa_newGene_16875	S/T-P-kinase-02	0.200779	-1.84897	0.0957137	-1.93327	Protein kinase domain	Receptor-like serine/threonine-protein kinase At2g45590 OS=Arabidopsis thaliana OX=3702 GN=At2g45590 PE=2 SV=1	receptor-like serine/threonine-protein kinase At2g45590 [Chenopodium quinoa]
3.2.1.1	AUR62016074	S/T-P-kinase-03	-1.38332	2.49521	-0.791111	1.13662	Protein tyrosine and serine/threonine kinase	Receptor-like serine/threonine-protein kinase At2g45590 OS=Arabidopsis thaliana OX=3702 GN=At2g45590 PE=2 SV=1	receptor-like serine/threonine-protein kinase At4g25390 [Chenopodium quinoa]
3.2.1.1	AUR62020037	S/T-P-kinase-04	0.796123	3.84247	-0.411521	-0.168195	Protein tyrosine and serine/threonine kinase	L-type lectin-domain containing receptor kinase IV.1 OS=Arabidopsis thaliana OX=3702 GN=LECRK41 PE=2 SV=1	receptor like protein kinase S.3-like [Chenopodium quinoa]
3.2.1.1	AUR62012534	SCP-01	0.656566	1.28465	0.433937	0.553897	SCP-2 sterol transfer family	Sterol carrier protein 2 OS=Arabidopsis thaliana OX=3702 GN=SCP2 PE=2 SV=1	non-specific lipid-transfer protein-like 1 [Chenopodium quinoa]
3.2.1.1	AUR62044174	SCP-02	1.27081	1.35033	0.648114	0.581551	SCP-2 sterol transfer family	Sterol carrier protein 2 OS=Arabidopsis thaliana OX=3702 GN=SCP2 PE=2 SV=1	non-specific lipid-transfer protein-like 1 [Chenopodium quinoa]
3.2.1.1	AUR62014661	SCP-03	0.0575987	1.28191	0.395609	0.531169	SCP-2 sterol transfer family	Sterol carrier protein 2 OS=Arabidopsis thaliana OX=3702 GN=SCP2 PE=2 SV=1	non-specific lipid-transfer protein-like 1 [Chenopodium quinoa]
3.2.1.1	AUR62012573	A-amylase-01	-1.39247	1.13668	0.265784	0.301029	Alpha-amylase C-terminal beta-sheet domain	Alpha-amylase OS=Vigna mungo OX=3915 GN=AMY1.1 PE=2 SV=1	alpha-amylase-like [Chenopodium quinoa]
3.2.1.1	AUR62012986	A-amylase-02	0.474495	2.98542	-0.0936503	1.02124	Alpha amylase, catalytic domain	Alpha-amylase OS=Vigna mungo OX=3915 GN=AMY1.1 PE=2 SV=1	alpha-amylase-like [Chenopodium quinoa]
3.2.1.1	AUR62036756	A-amylase-03	-0.651294	1.05851	-1.01208	0.342139	Alpha-amylase C-terminal beta-sheet domain	Probable alpha-amylase 2 OS=Arabidopsis thaliana OX=3702 GN=AMY2 PE=2 SV=1	probable alpha-amylase 2 [Chenopodium quinoa]
3.2.1.1	AUR62013843	A-amylase-04	0.151419	1.15276	0.229612	1.71201	Alpha-amylase C-terminal beta-sheet domain	Probable alpha-amylase 2 OS=Arabidopsis thaliana OX=3702 GN=AMY2 PE=2 SV=1	probable alpha-amylase 2 isoform X2 [Chenopodium quinoa]
3.2.1.1	AUR62013844	A-amylase-05	0.583828	1.15758	0.895238	0.477584	Alpha-amylase C-terminal beta-sheet domain	Probable alpha-amylase 2 OS=Arabidopsis thaliana OX=3702 GN=AMY2 PE=2 SV=1	probable alpha-amylase 2 isoform X2 [Chenopodium quinoa]
3.2.1.1	AUR62014627	NPH3-01	-0.442819	2.2219	-0.00202356	0.615083	NPH3 family	Alpha-amylase OS=Vigna mungo OX=3915 GN=AMY1.1 PE=2 SV=1	BTB/POZ domain-containing protein At3g22104-like [Chenopodium quinoa]
3.2.1.1	AUR62020027	IV.2-01	--	1.69815	--	--	Legume lectin domain	L-type lectin-domain containing receptor kinase SIT2 OS=Oryza sativa subsp. japonica OX=39947 GN=SIT2 PE=2 SV=2	L-type lectin-domain containing receptor kinase IV.2-like [Chenopodium quinoa]
3.2.1.1	AUR62020028	IV.2-02	0.14353	1.02172	0.138317	-0.255331	Legume lectin domain	L-type lectin-domain containing receptor kinase SIT2 OS=Oryza sativa subsp. japonica OX=39947 GN=SIT2 PE=2 SV=2	L-type lectin-domain containing receptor kinase IV.2-like isoform X2 [Chenopodium quinoa]
3.2.1.1	AUR62020029	IV.2-03	-0.0628544	1.24967	0.158219	0.0761057	Legume lectin domain	L-type lectin-domain containing receptor kinase SIT2 OS=Oryza sativa subsp. japonica OX=39947 GN=SIT2 PE=2 SV=2	L-type lectin-domain containing receptor kinase IV.2-like isoform X2 [Chenopodium quinoa]
3.2.1.1	AUR62020031	IV.2-04	0.268526	1.4087	-0.497533	0.529296	Legume lectin domain	L-type lectin-domain containing receptor kinase IV.2 OS=Arabidopsis thaliana OX=3702 GN=LECRK42 PE=2 SV=1	L-type lectin-domain containing receptor kinase IV.2-like [Chenopodium quinoa]
3.2.1.1	AUR62040708	S.4	1.54523	3.33817	0.993091	1.34615	Legume lectin domain	L-type lectin-domain containing receptor kinase S.4 OS=Arabidopsis thaliana OX=3702 GN=LECRKS4 PE=2 SV=1	L-type lectin-domain containing receptor kinase S.4-like [Chenopodium quinoa]
3.2.1.1	AUR62029521	S.5	-1.76623	-0.633466	-2.0371	-1.0926	Legume lectin domain	Probable L-type lectin-domain containing receptor kinase S.5 OS=Arabidopsis thaliana OX=3702 GN=LECRKS5 PE=2 SV=1	probable L-type lectin-domain containing receptor kinase S.5 [Chenopodium quinoa]
3.2.1.1	AUR62020030	IV.1-01	-0.736162	1.50136	0.0106172	0.922783	Legume lectin domain	L-type lectin-domain containing receptor kinase SIT2 OS=Oryza sativa subsp. japonica OX=39947 GN=SIT2 PE=2 SV=2	L-type lectin-domain containing receptor kinase IV.1-like [Chenopodium quinoa]
3.2.1.1	AUR62020033	IV.1-02	-1.10528	-2.0952	-0.630176	-2.09772	Legume lectin domain	L-type lectin-domain containing receptor kinase IV.1 OS=Arabidopsis thaliana OX=3702 GN=LECRK41 PE=2 SV=1	L-type lectin-domain containing receptor kinase IV.1-like [Chenopodium quinoa]
3.2.1.1	AUR62020036	IV.1-03	0.316939	2.43172	-0.257451	0.000105284	Legume lectin domain	L-type lectin-domain containing receptor kinase IV.1 OS=Arabidopsis thaliana OX=3702 GN=LECRK41 PE=2 SV=1	L-type lectin-domain containing receptor kinase IV.1-like [Chenopodium quinoa]
3.2.1.20	AUR62021097	G-hydrolases-83	0.542198	1.72551	0.235952	0.406842	Glycosyl hydrolases family 31	Alpha-glucosidase OS=Beta vulgaris OX=161934 PE=1 SV=1	alpha-glucosidase-like [Chenopodium quinoa]
3.2.1.20	AUR62030309	G-hydrolases-84	-0.11582	1.70347	-0.368371	0.650503	Glycosyl hydrolases family 31	Alpha-xylosidase 1 OS=Arabidopsis thaliana OX=3702 GN=XYL1 PE=1 SV=1	uncharacterized protein LOC110710671 [Chenopodium quinoa]
3.2.1.20	AUR62031441	G-hydrolases-85	-0.421181	1.41341	-0.0611302	-0.505075	Glycosyl hydrolases family 31	Alpha-glucosidase OS=Beta vulgaris OX=161934 PE=1 SV=1	LOW QUALITY PROTEIN: alpha-glucosidase-like [Chenopodium quinoa]
3.2.1.20	AUR62021100	G-hydrolases-86	0.0684529	-0.471037	0.0927022	-1.1758	Glycosyl hydrolases family 31	Alpha-glucosidase OS=Spinacia oleracea OX=3562 PE=1 SV=1	alpha-glucosidase-like [Chenopodium quinoa]

## Sheet: MAPK
Table S2 MAPK signaling involves genes
Flg22	#ID	name	HZ1-C3-vs-T3	HZ1-C9-vs-T9	L1-C3-vs-T3	L1-C9-vs-T9	HZ1-C3-vs-T3	HZ1-C9-vs-T9	L1-C3-vs-T3	L1-C9-vs-T9	Pfam_annotation	Swiss_Prot_annotation	NR_annotation
FLS2	AUR62002385	PK-01	normal	down	normal	normal	0.2926	-1.30239	0.312164	-0.546169	Protein kinase domain	Putative receptor protein kinase ZmPK1 OS=Zea mays OX=4577 GN=PK1 PE=2 SV=2	putative receptor protein kinase ZmPK1 [Chenopodium quinoa]
FLS2	AUR62038929	PK-02	normal	normal	normal	down	0.234529	3.29371	-0.439185	0.0668612	Leucine rich repeat	Putative receptor-like protein kinase At3g47110 OS=Arabidopsis thaliana OX=3702 GN=At3g47110 PE=3 SV=1	probable leucine-rich repeat receptor-like protein kinase At1g35710 [Chenopodium quinoa]
FLS2	AUR62023802	PK-03	normal	normal	normal	down	0.661067	2.08336	--	--	Protein kinase domain	Putative receptor protein kinase ZmPK1 OS=Zea mays OX=4577 GN=PK1 PE=2 SV=2	putative receptor protein kinase ZmPK1 [Chenopodium quinoa]
FLS2	AUR62027590	LRR10	down	normal	normal	normal	-2.05287	-0.291741	-1.77044	-1.19677	Leucine rich repeat	LRR receptor-like serine/threonine-protein kinase FLS2 OS=Arabidopsis thaliana OX=3702 GN=FLS2 PE=1 SV=1	LRR receptor-like serine/threonine-protein kinase FLS2 [Chenopodium quinoa]
FLS2	AUR62007644	LRR11	normal	up	normal	up	-0.540164	0.226969	-0.621338	-1.18147	Leucine rich repeat	LRR receptor-like serine/threonine-protein kinase EFR OS=Arabidopsis thaliana OX=3702 GN=EFR PE=1 SV=1	LRR receptor-like serine/threonine-protein kinase ERL1 [Chenopodium quinoa]
FLS2	AUR62039085	LRR12	normal	normal	normal	down	-0.264021	-1.7951	0.361528	-1.44385	Protein kinase domain	Probable LRR receptor-like serine/threonine-protein kinase At4g37250 OS=Arabidopsis thaliana OX=3702 GN=At4g37250 PE=1 SV=1	probable LRR receptor-like serine/threonine-protein kinase At4g37250 [Chenopodium quinoa]
FLS2	AUR62004671	GLSRS/T-kinase-04	normal	normal	normal	down	0.269193	-0.282948	-1.12506	-1.4062	Protein kinase domain	G-type lectin S-receptor-like serine/threonine-protein kinase At1g34300 OS=Arabidopsis thaliana OX=3702 GN=At1g34300 PE=1 SV=1	G-type lectin S-receptor-like serine/threonine-protein kinase At1g34300 [Chenopodium quinoa]
FLS2	AUR62011365	XA21	down	up	normal	normal	-1.102	0.157061	-0.858561	0.453875	Protein kinase domain	Receptor kinase-like protein Xa21 OS=Oryza sativa subsp. japonica OX=39947 GN=XA21 PE=1 SV=1	probable LRR receptor-like serine/threonine-protein kinase At3g47570 [Chenopodium quinoa]
FLS2	AUR62013873	LECRK3-04	normal	up	--	--	0.276049	1.13959	0.0755127	1.09931	D-mannose binding lectin	G-type lectin S-receptor-like serine/threonine-protein kinase LECRK3 OS=Oryza sativa subsp. japonica OX=39947 GN=LECRK3 PE=3 SV=2	G-type lectin S-receptor-like serine/threonine-protein kinase LECRK3 [Chenopodium quinoa]
FLS2	AUR62021884	GLSRS/T-kinase-01	normal	down	normal	down	-0.0565615	-0.236348	-0.547832	-1.49946	Protein kinase domain	G-type lectin S-receptor-like serine/threonine-protein kinase At5g24080 OS=Arabidopsis thaliana OX=3702 GN=At5g24080 PE=2 SV=1	G-type lectin S-receptor-like serine/threonine-protein kinase At2g19130 [Chenopodium quinoa]
FLS2	AUR62023590	GLSRS/T-kinase-02	normal	down	normal	down	-0.0227077	0.0969964	-0.35501	-1.051	Protein kinase domain	G-type lectin S-receptor-like serine/threonine-protein kinase At1g34300 OS=Arabidopsis thaliana OX=3702 GN=At1g34300 PE=1 SV=1	G-type lectin S-receptor-like serine/threonine-protein kinase At1g34300 [Chenopodium quinoa]
FLS2	AUR62023591	GLSRS/T-kinase-03	down	normal	down	normal	-1.52129	2.00085	-0.239634	-0.638086	Protein kinase domain	G-type lectin S-receptor-like serine/threonine-protein kinase At1g34300 OS=Arabidopsis thaliana OX=3702 GN=At1g34300 PE=1 SV=1	G-type lectin S-receptor-like serine/threonine-protein kinase At1g34300 [Chenopodium quinoa]
FLS2	AUR62024412	SD3-1-01	normal	down	normal	down	-0.375787	-1.33855	-0.301815	-1.16967	Plant organelle RNA recognition domain	G-type lectin S-receptor-like serine/threonine-protein kinase SD3-1 OS=Arabidopsis thaliana OX=3702 GN=SD31 PE=3 SV=1	G-type lectin S-receptor-like serine/threonine-protein kinase SD3-1 [Chenopodium quinoa]
FLS2	AUR62026007	SD3-1-02	normal	up	normal	normal	-0.926482	-1.57884	-0.731833	-1.26375	D-mannose binding lectin	G-type lectin S-receptor-like serine/threonine-protein kinase SD3-1 OS=Arabidopsis thaliana OX=3702 GN=SD31 PE=3 SV=1	G-type lectin S-receptor-like serine/threonine-protein kinase SD3-1 [Chenopodium quinoa]
FLS2	AUR62036721	LECRK3-05	up	up	normal	up	-0.758539	-1.54632	-0.527012	-1.63697	D-mannose binding lectin	G-type lectin S-receptor-like serine/threonine-protein kinase LECRK3 OS=Oryza sativa subsp. japonica OX=39947 GN=LECRK3 PE=3 SV=2	G-type lectin S-receptor-like serine/threonine-protein kinase LECRK3 [Chenopodium quinoa]
FLS2	AUR62039001	SD3-1-03	normal	down	normal	down	1.09597	5.6222	0.0667236	1.39078	Leucine rich repeat	--	probable leucine-rich repeat receptor-like protein kinase At1g35710 [Chenopodium quinoa]
BAK1	AUR62000060	RLK1	--	up	--	--	--	2.03379	--	--	Protein kinase domain	G-type lectin S-receptor-like serine/threonine-protein kinase RLK1 OS=Arabidopsis thaliana OX=3702 GN=RLK1 PE=2 SV=2	G-type lectin S-receptor-like serine/threonine-protein kinase RLK1 [Chenopodium quinoa]
BAK1	AUR62000235	SD2-5	up	down	normal	normal	1.07149	-1.15352	0.264383	-0.195179	Protein kinase domain	G-type lectin S-receptor-like serine/threonine-protein kinase SD2-5 OS=Arabidopsis thaliana OX=3702 GN=SD25 PE=1 SV=1	G-type lectin S-receptor-like serine/threonine-protein kinase SD2-5 [Chenopodium quinoa]
BAK1	AUR62000591	Kinase-2.5	normal	up	normal	normal	0.418036	1.84145	-0.851216	0.914178	Protein kinase domain	LEAF RUST 10 DISEASE-RESISTANCE LOCUS RECEPTOR-LIKE PROTEIN KINASE-like 2.5 OS=Arabidopsis thaliana OX=3702 GN=LRK10L-2.5 PE=3 SV=1	LEAF RUST 10 DISEASE-RESISTANCE LOCUS RECEPTOR-LIKE PROTEIN KINASE-like 2.5 [Chenopodium quinoa]
BAK1	AUR62006585	SD2-5-01	normal	up	normal	normal	-0.283247	2.86285	0.00385241	1.75073	Protein kinase domain	G-type lectin S-receptor-like serine/threonine-protein kinase SD2-5 OS=Arabidopsis thaliana OX=3702 GN=SD25 PE=1 SV=1	G-type lectin S-receptor-like serine/threonine-protein kinase SD2-5 isoform X1 [Chenopodium quinoa]
BAK1	AUR62012397	SD2-5-02	normal	up	normal	up	0.47797	0.732567	-0.0449068	-1.04613	Protein kinase domain	G-type lectin S-receptor-like serine/threonine-protein kinase SD2-5 OS=Arabidopsis thaliana OX=3702 GN=SD25 PE=1 SV=1	G-type lectin S-receptor-like serine/threonine-protein kinase SD2-5 [Chenopodium quinoa]
BAK1	AUR62012590	CRK25	normal	normal	normal	down	--	6.14094	--	--	Protein kinase domain	Cysteine-rich receptor-like protein kinase 25 OS=Arabidopsis thaliana OX=3702 GN=CRK25 PE=3 SV=1	cysteine-rich receptor-like protein kinase 10 isoform X1 [Chenopodium quinoa]
BAK1	AUR62041117	RL-kinase-01	--	up	--	--	0.467464	1.20308	0.167042	-0.327538	Protein kinase domain	Probable receptor-like protein kinase At1g11050 OS=Arabidopsis thaliana OX=3702 GN=At1g11050 PE=2 SV=1	probable receptor-like protein kinase At1g11050 [Chenopodium quinoa]
BAK1	Chenopodium_quinoa_newGene_10028	RL-kinase-02	normal	up	normal	normal	-0.424281	--	-1.17274	--	Protein kinase domain	Probable receptor-like protein kinase At5g20050 OS=Arabidopsis thaliana OX=3702 GN=At5g20050 PE=2 SV=1	probable receptor-like protein kinase At5g20050 [Chenopodium quinoa]
BAK1	AUR62013868	LECRK3-01	normal	up	normal	normal	-0.307835	1.64423	0.0238892	0.0123832	Protein kinase domain	G-type lectin S-receptor-like serine/threonine-protein kinase LECRK3 OS=Oryza sativa subsp. japonica OX=39947 GN=LECRK3 PE=3 SV=2	G-type lectin S-receptor-like serine/threonine-protein kinase LECRK3 [Chenopodium quinoa]
BAK1	AUR62019238	LECRK3-02	up	normal	normal	normal	-0.106745	-1.33525	-0.424749	-0.913089	Protein kinase domain	G-type lectin S-receptor-like serine/threonine-protein kinase RLK1 OS=Arabidopsis thaliana OX=3702 GN=RLK1 PE=2 SV=2	G-type lectin S-receptor-like serine/threonine-protein kinase LECRK3 [Chenopodium quinoa]
BAK1	AUR62020419	LECRK3-03	normal	down	normal	normal	0.321966	1.6054	-1.37447	-1.45498	Protein kinase domain	G-type lectin S-receptor-like serine/threonine-protein kinase At2g19130 OS=Arabidopsis thaliana OX=3702 GN=At2g19130 PE=2 SV=1	G-type lectin S-receptor-like serine/threonine-protein kinase At2g19130 [Chenopodium quinoa]
BAK1	AUR62020820	Kinase-S.2-01	normal	up	normal	normal	--	2.7297	--	1.86611	Protein kinase domain	Receptor like protein kinase S.2 OS=Arabidopsis thaliana OX=3702 GN=LECRKS2 PE=2 SV=2	receptor like protein kinase S.2-like [Chenopodium quinoa]
BAK1	AUR62020822	Kinase-S.2-02	normal	up	normal	down	--	2.57635	--	1.92966	Protein kinase domain	Receptor like protein kinase S.2 OS=Arabidopsis thaliana OX=3702 GN=LECRKS2 PE=2 SV=2	receptor like protein kinase S.2-like [Chenopodium quinoa]
BAK1	AUR62026776	LRR09	--	up	--	up	-0.827883	-0.963583	0.0369027	-1.57904	Protein kinase domain	Probable LRR receptor-like serine/threonine-protein kinase At1g56140 OS=Arabidopsis thaliana OX=3702 GN=At1g56140 PE=2 SV=2	probable LRR receptor-like serine/threonine-protein kinase At1g56140 [Chenopodium quinoa]
BAK1	AUR62035473	CRPK1-01	--	up	--	up	-1.12056	-0.199342	-1.28453	-0.336745	Protein kinase domain	Cold-responsive protein kinase 1 OS=Arabidopsis thaliana OX=3702 GN=CRPK1 PE=1 SV=1	cold-responsive protein kinase 1-like isoform X1 [Chenopodium quinoa]
BAK1	AUR62036724	LECRK1	normal	normal	normal	down	-0.847933	3.318	0.107314	0.355058	Protein kinase domain	G-type lectin S-receptor-like serine/threonine-protein kinase LECRK3 OS=Oryza sativa subsp. japonica OX=39947 GN=LECRK3 PE=3 SV=2	LOW QUALITY PROTEIN: G-type lectin S-receptor-like serine/threonine-protein kinase LECRK3, partial [Chenopodium quinoa]
BAK1	AUR62036104	CRPK1-02	down	normal	down	normal	-0.121969	1.31305	-0.671521	0.592087	Protein tyrosine and serine/threonine kinase	Cold-responsive protein kinase 1 OS=Arabidopsis thaliana OX=3702 GN=CRPK1 PE=1 SV=1	cold-responsive protein kinase 1-like [Chenopodium quinoa]
BAK1	AUR62005476	LR10	normal	up	normal	normal	-0.467485	3.51739	-0.120172	0.661454	Protein tyrosine and serine/threonine kinase	Rust resistance kinase Lr10 OS=Triticum aestivum OX=4565 GN=LRK10 PE=2 SV=1	rust resistance kinase Lr10-like [Chenopodium quinoa]
BAK1	AUR62019533	CRPK1-03	normal	up	normal	normal	-0.443357	2.76277	-0.225243	0.786562	Protein tyrosine and serine/threonine kinase	Cold-responsive protein kinase 1 OS=Arabidopsis thaliana OX=3702 GN=CRPK1 PE=1 SV=1	cold-responsive protein kinase 1-like isoform X1 [Chenopodium quinoa]
BAK1	AUR62016382	LRR10	normal	normal	normal	down	-0.425544	2.01433	0.0126757	-0.717902	Protein tyrosine and serine/threonine kinase	Probable LRR receptor-like serine/threonine-protein kinase At1g07650 OS=Arabidopsis thaliana OX=3702 GN=At1g07650 PE=1 SV=1	uncharacterized protein LOC110698820 [Chenopodium quinoa]
BAK1	AUR62017392	NIK3	normal	up	normal	normal	1.54336	0.0459505	1.45491	-0.821384	Protein tyrosine and serine/threonine kinase	Protein NSP-INTERACTING KINASE 3 OS=Arabidopsis thaliana OX=3702 GN=NIK3 PE=1 SV=1	probable LRR receptor-like serine/threonine-protein kinase At1g34110 [Chenopodium quinoa]
BAK1	AUR62039501	RFK1	normal	--	down	--	-0.635756	0.153134	-0.355782	-1.64625	Protein tyrosine and serine/threonine kinase	Probable LRR receptor-like serine/threonine-protein kinase RFK1 OS=Arabidopsis thaliana OX=3702 GN=RKF1 PE=1 SV=1	probable LRR receptor-like serine/threonine-protein kinase RFK1 isoform X4 [Chenopodium quinoa]
MEKK1	AUR62039042	MEKK1	normal	down	normal	normal	-0.988428	-1.31227	-0.709292	-0.0985737	--	Protein OPAQUE10 OS=Zea mays OX=4577 GN=O10 PE=1 SV=1	uncharacterized protein LOC110686393 [Chenopodium quinoa]
MKK1/2	AUR62025111	MKK2-01	normal	up	normal	normal	-0.191201	1.14932	0.169454	-0.35114	Protein kinase domain	Mitogen-activated protein kinase kinase 2 OS=Arabidopsis thaliana OX=3702 GN=MKK2 PE=1 SV=2	mitogen-activated protein kinase kinase 2-like [Chenopodium quinoa]
MKK1/2	AUR62029019	MKK2-02	normal	up	normal	normal	-0.39148	1.59862	0.344168	-0.0863205	Protein kinase domain	Mitogen-activated protein kinase kinase 2 OS=Arabidopsis thaliana OX=3702 GN=MKK2 PE=1 SV=2	LOW QUALITY PROTEIN: mitogen-activated protein kinase kinase 2-like [Chenopodium quinoa]
MKK4/5	AUR62009694	LDSH01	--	up	--	--	--	3.08975	--	--	Protein of unknown function (DUF640)	Protein LIGHT-DEPENDENT SHORT HYPOCOTYLS 6 OS=Arabidopsis thaliana OX=3702 GN=LSH6 PE=1 SV=1	protein LIGHT-DEPENDENT SHORT HYPOCOTYLS 5-like [Chenopodium quinoa]
MKK4/5	AUR62042772	LDSH02	--	up	--	--	--	2.2184	--	--	Protein of unknown function (DUF640)	Protein LIGHT-DEPENDENT SHORT HYPOCOTYLS 10 OS=Arabidopsis thaliana OX=3702 GN=LSH10 PE=1 SV=1	protein LIGHT-DEPENDENT SHORT HYPOCOTYLS 10-like [Chenopodium quinoa]
MKK4/5	AUR62011850	LDSH03	normal	normal	normal	down	0.642446	-0.0671472	-0.628896	-1.44134	Protein of unknown function (DUF640)	Protein LIGHT-DEPENDENT SHORT HYPOCOTYLS 4 OS=Arabidopsis thaliana OX=3702 GN=LSH4 PE=1 SV=1	uncharacterized protein LOC110734339 [Chenopodium quinoa]
MPK3/6	AUR62025042	MPK3	normal	up	normal	normal	-0.801603	1.99233	-0.934937	-0.350755	Protein kinase domain	Mitogen-activated protein kinase 3 OS=Arabidopsis thaliana OX=3702 GN=MPK3 PE=1 SV=2	mitogen-activated protein kinase 3-like [Chenopodium quinoa]
ACS6	AUR62004409	ASC6-01	up	up	--	up	1.56822	7.10619	--	4.21037	Aminotransferase class I and II	1-aminocyclopropane-1-carboxylate synthase OS=Dianthus caryophyllus OX=3570 GN=ACS2 PE=2 SV=1	1-aminocyclopropane-1-carboxylate synthase-like [Chenopodium quinoa]
ACS6	AUR62022615	ASC6-02	normal	up	--	--	-0.0883073	3.04357	--	--	Aminotransferase class I and II	1-aminocyclopropane-1-carboxylate synthase OS=Dianthus caryophyllus OX=3570 GN=ACS2 PE=2 SV=1	1-aminocyclopropane-1-carboxylate synthase-like [Chenopodium quinoa]
WRKY33	AUR62006298	WRKY01	normal	normal	normal	down	0.68922	-0.774126	-0.732281	-1.11225	WRKY DNA -binding domain	Probable WRKY transcription factor 33 OS=Arabidopsis thaliana OX=3702 GN=WRKY33 PE=1 SV=2	probable WRKY transcription factor 33 [Chenopodium quinoa]
WRKY33	AUR62009104	WRKY02	down	normal	normal	normal	-1.37068	-0.416311	-0.577626	-0.615823	WRKY DNA -binding domain	Probable WRKY transcription factor 50 OS=Arabidopsis thaliana OX=3702 GN=WRKY50 PE=2 SV=1	probable WRKY transcription factor 50 isoform X1 [Chenopodium quinoa]
WRKY33	AUR62009363	WRKY03	normal	up	normal	normal	0.161634	1.2971	-0.459893	0.58332	WRKY DNA -binding domain	Probable WRKY transcription factor 32 OS=Arabidopsis thaliana OX=3702 GN=WRKY32 PE=2 SV=1	probable WRKY transcription factor 20 [Chenopodium quinoa]
WRKY33	AUR62009710	WRKY04	normal	up	normal	normal	-0.2797	1.94246	-0.189567	0.680692	WRKY DNA -binding domain	WRKY transcription factor WRKY24 OS=Oryza sativa subsp. indica OX=39946 GN=WRKY24 PE=2 SV=1	WRKY transcription factor WRKY24-like [Chenopodium quinoa]
WRKY33	AUR62012739	WRKY05	normal	up	normal	normal	0.498604	3.78175	-0.336782	-0.0850152	WRKY DNA -binding domain	WRKY transcription factor 42 OS=Arabidopsis thaliana OX=3702 GN=WRKY42 PE=1 SV=1	probable WRKY transcription factor 31 [Chenopodium quinoa]
WRKY33	AUR62020567	WRKY06	down	normal	normal	normal	-1.7605	-0.835751	-0.647316	0.0279369	WRKY DNA -binding domain	Probable WRKY transcription factor 50 OS=Arabidopsis thaliana OX=3702 GN=WRKY50 PE=2 SV=1	probable WRKY transcription factor 50 isoform X2 [Chenopodium quinoa]
WRKY33	AUR62021917	WRKY07	normal	up	normal	normal	0.550255	2.44044	-0.372899	0.127056	WRKY DNA -binding domain	WRKY transcription factor 42 OS=Arabidopsis thaliana OX=3702 GN=WRKY42 PE=1 SV=1	probable WRKY transcription factor 31 [Chenopodium quinoa]
WRKY33	AUR62023044	WRKY08	normal	up	normal	normal	0.114832	1.57079	-0.274463	1.01366	WRKY DNA -binding domain	Probable WRKY transcription factor 32 OS=Arabidopsis thaliana OX=3702 GN=WRKY32 PE=2 SV=1	probable WRKY transcription factor 32 [Chenopodium quinoa]
WRKY33	AUR62026343	WRKY09	normal	normal	normal	down	0.506539	-0.988469	-0.694323	-1.18882	WRKY DNA -binding domain	Probable WRKY transcription factor 33 OS=Arabidopsis thaliana OX=3702 GN=WRKY33 PE=1 SV=2	probable WRKY transcription factor 33 [Chenopodium quinoa]
WRKY33	AUR62036235	WRKY10	normal	up	normal	normal	-0.25954	1.94364	-0.0902643	0.924905	WRKY DNA -binding domain	WRKY transcription factor WRKY24 OS=Oryza sativa subsp. indica OX=39946 GN=WRKY24 PE=2 SV=1	WRKY transcription factor WRKY24-like [Chenopodium quinoa]
WRKY33	AUR62038851	WRKY11	--	up	--	--	--	3.47647	--	--	WRKY DNA -binding domain	Probable WRKY transcription factor 75 OS=Arabidopsis thaliana OX=3702 GN=WRKY75 PE=1 SV=1	probable WRKY transcription factor 75 [Chenopodium quinoa]
VIP1	AUR62010368	b-ZIP01	normal	up	normal	up	0.945244	2.48706	0.949588	1.08167	bZIP transcription factor	bZIP transcription factor 29 OS=Arabidopsis thaliana OX=3702 GN=BZIP29 PE=2 SV=1	uncharacterized protein LOC110718856 [Chenopodium quinoa]
VIP1	AUR62016851	b-ZIP02	normal	up	normal	up	0.572934	2.43756	0.692912	1.18462	bZIP transcription factor	bZIP transcription factor 29 OS=Arabidopsis thaliana OX=3702 GN=BZIP29 PE=2 SV=1	transcription factor VIP1-like [Chenopodium quinoa]
VIP1	AUR62019143	b-ZIP03	normal	up	normal	normal	0.545648	1.01032	0.188375	0.275075	bZIP transcription factor	bZIP transcription factor 29 OS=Arabidopsis thaliana OX=3702 GN=BZIP29 PE=2 SV=1	probable transcription factor PosF21 [Chenopodium quinoa]
VIP1	AUR62023846	b-ZIP04	normal	up	normal	normal	0.0446897	1.09364	0.307977	0.17264	bZIP transcription factor	Probable transcription factor PosF21 OS=Arabidopsis thaliana OX=3702 GN=POSF21 PE=2 SV=1	probable transcription factor PosF21 [Chenopodium quinoa]
VIP1	AUR62026729	b-ZIP05	normal	up	normal	normal	-0.0535352	1.54168	0.0168897	0.65798	bZIP transcription factor	Transcription factor VIP1 OS=Arabidopsis thaliana OX=3702 GN=VIP1 PE=1 SV=1	transcription factor VIP1-like [Chenopodium quinoa]
VIP1	AUR62009733	b-ZIP06	normal	down	normal	down	0.136805	-1.95191	-0.257247	-1.50009	bZIP transcription factor	bZIP transcription factor 18 OS=Arabidopsis thaliana OX=3702 GN=BZIP18 PE=1 SV=1	transcription factor RF2b-like [Chenopodium quinoa]
VIP1	AUR62036211	b-ZIP07	normal	down	normal	normal	-0.00456964	-1.61702	-0.353009	-0.494181	bZIP transcription factor	bZIP transcription factor 18 OS=Arabidopsis thaliana OX=3702 GN=BZIP18 PE=1 SV=1	transcription factor RF2b-like [Chenopodium quinoa]
PR1	AUR62027038	PR1-01	down	normal	normal	normal	-2.81252	1.8896	-0.849828	-0.10764	Cysteine-rich secretory protein family	Pathogenesis-related protein PRB1-3 OS=Hordeum vulgare OX=4513 PE=2 SV=1	hypothetical protein Ahy_B10g100824 [Arachis hypogaea]
PR1	AUR62027039	PR1-02	down	up	normal	normal	-4.4194	3.08206	-0.567511	0.272483	Cysteine-rich secretory protein family	Pathogenesis-related protein 1A OS=Nicotiana tabacum OX=4097 PE=1 SV=1	pathogenesis-related protein 1A-like [Chenopodium quinoa]
PR1	AUR62030884	PR1-03	down	up	normal	normal	-2.5672	2.07462	-0.385339	-0.324536	Cysteine-rich secretory protein family	Pathogenesis-related protein PRB1-3 OS=Hordeum vulgare OX=4513 PE=2 SV=1	pathogenesis-related protein PRB1-3-like [Chenopodium quinoa]
PR1	AUR62030885	PR1-04	down	normal	down	down	-1.92591	0.61535	-1.59728	-1.32259	Cysteine-rich secretory protein family	Pathogenesis-related protein PR-1 type OS=Sambucus nigra OX=4202 PE=2 SV=1	pathogenesis-related protein PR-1 type-like [Chenopodium quinoa]
PR1	AUR62030886	PR1-05	down	up	normal	normal	-2.13691	2.73848	-1.30393	0.192404	Cysteine-rich secretory protein family	Pathogenesis-related protein PRB1-3 OS=Hordeum vulgare OX=4513 PE=2 SV=1	pathogenesis-related protein PRB1-3-like [Chenopodium quinoa]
PR1	AUR62030888	PR1-06	--	up	--	--	--	4.29474	--	--	Cysteine-rich secretory protein family	Pathogenesis-related protein 1B OS=Nicotiana tabacum OX=4097 PE=2 SV=1	pathogenesis-related protein 1B-like [Chenopodium quinoa]
PR1	AUR62039993	PR1-07	--	down	normal	normal	--	-4.58008	0.172565	-1.15616	Cysteine-rich secretory protein family	Pathogenesis-related protein PR-1 OS=Medicago truncatula OX=3880 GN=PR-1 PE=2 SV=1	pathogenesis-related protein PRB1-3-like [Chenopodium quinoa]
FRK1	AUR62009469	CRR-kinase2	down	normal	down	normal	-1.22966	-0.29994	-1.47289	0.611169	Protein kinase domain	Calcium/calmodulin-regulated receptor-like kinase 2 OS=Arabidopsis thaliana OX=3702 GN=CRLK2 PE=2 SV=1	calcium/calmodulin-regulated receptor-like kinase 2 [Chenopodium quinoa]
FRK1	AUR62017049	LRR01	normal	down	normal	down	-0.317978	-1.59722	-0.314237	-1.56912	Malectin-like domain	Receptor-like protein 4 OS=Arabidopsis thaliana OX=3702 GN=RLP4 PE=2 SV=1	receptor-like protein kinase At5g59670 isoform X1 [Chenopodium quinoa]
FRK1	AUR62022245	LRR02	normal	down	--	down	-0.762266	-3.52826	--	-1.6407	Malectin-like domain	Probable LRR receptor-like serine/threonine-protein kinase At1g05700 OS=Arabidopsis thaliana OX=3702 GN=At1g05700 PE=1 SV=1	putative leucine-rich repeat receptor-like serine/threonine-protein kinase At2g19230 isoform X4 [Chenopodium quinoa]
FRK1	AUR62022249	LRR03	down	normal	down	normal	-1.80564	1.33318	-1.108	-0.120206	Malectin-like domain	Putative leucine-rich repeat receptor-like serine/threonine-protein kinase At2g19230 OS=Arabidopsis thaliana OX=3702 GN=At2g19230 PE=1 SV=3	putative leucine-rich repeat receptor-like serine/threonine-protein kinase At2g19230 isoform X2 [Chenopodium quinoa]
FRK1	AUR62022254	LRR04	down	up	normal	normal	-1.7204	-5.58678	-0.614426	--	Malectin-like domain	Probable LRR receptor-like serine/threonine-protein kinase At4g29180 OS=Arabidopsis thaliana OX=3702 GN=At4g29180 PE=1 SV=2	LOW QUALITY PROTEIN: probable LRR receptor-like serine/threonine-protein kinase At4g29180 [Chenopodium quinoa]
FRK1	AUR62031963	LRR05	down	down	normal	--	-1.2239	3.3894	--	--	Malectin-like domain	Putative leucine-rich repeat receptor-like protein kinase At2g19210 OS=Arabidopsis thaliana OX=3702 GN=At2g19210 PE=1 SV=1	probable LRR receptor-like serine/threonine-protein kinase At1g05700 isoform X2 [Chenopodium quinoa]
FRK1	AUR62031970	LRR06	down	down	--	--	-1.09647	-2.10726	-0.192227	-2.10857	Malectin-like domain	Probable LRR receptor-like serine/threonine-protein kinase At4g29180 OS=Arabidopsis thaliana OX=3702 GN=At4g29180 PE=1 SV=2	probable LRR receptor-like serine/threonine-protein kinase At4g29180 [Chenopodium quinoa]
FRK1	AUR62022246	LRR07	normal	up	--	--	-1.86221	-0.740338	-1.92267	-0.191931	Protein tyrosine and serine/threonine kinase	Probable LRR receptor-like serine/threonine-protein kinase At4g29180 OS=Arabidopsis thaliana OX=3702 GN=At4g29180 PE=1 SV=2	putative leucine-rich repeat receptor-like serine/threonine-protein kinase At2g19230 isoform X2 [Chenopodium quinoa]
FRK1	AUR62022255	LRR08	down	down	normal	down	-1.82214	-5.34732	--	--	Protein tyrosine and serine/threonine kinase	Probable LRR receptor-like serine/threonine-protein kinase At4g29180 OS=Arabidopsis thaliana OX=3702 GN=At4g29180 PE=1 SV=2	LOW QUALITY PROTEIN: probable LRR receptor-like serine/threonine-protein kinase At4g29180 [Chenopodium quinoa]
WRKY22/29	AUR62003924	WRKY12	normal	up	normal	normal	0.455604	2.24448	-0.288523	0.5045	WRKY DNA -binding domain	Probable WRKY transcription factor 15 OS=Arabidopsis thaliana OX=3702 GN=WRKY15 PE=2 SV=1	probable WRKY transcription factor 15 [Chenopodium quinoa]
WRKY22/29	AUR62004902	WRKY13	up	up	--	up	1.49839	1.71453	--	2.42781	WRKY DNA -binding domain	Probable WRKY transcription factor 74 OS=Arabidopsis thaliana OX=3702 GN=WRKY74 PE=2 SV=2	probable WRKY transcription factor 21 isoform X1 [Chenopodium quinoa]
WRKY22/29	AUR62032241	WRKY14	normal	down	down	normal	-0.873961	-1.16591	-1.16161	-0.799996	Plant zinc cluster domain	Probable WRKY transcription factor 21 OS=Arabidopsis thaliana OX=3702 GN=WRKY21 PE=1 SV=1	probable WRKY transcription factor 21 [Chenopodium quinoa]
WRKY22/29	AUR62038238	WRKY15	normal	up	normal	normal	-0.0702746	1.63804	-0.456142	0.469274	WRKY DNA -binding domain	Probable WRKY transcription factor 15 OS=Arabidopsis thaliana OX=3702 GN=WRKY15 PE=2 SV=1	probable WRKY transcription factor 15 [Chenopodium quinoa]
WRKY22/29	AUR62038804	WRKY16	normal	up	normal	normal	0.0731626	1.48207	-0.107605	0.802548	WRKY DNA -binding domain	Probable WRKY transcription factor 7 OS=Arabidopsis thaliana OX=3702 GN=WRKY7 PE=1 SV=1	probable WRKY transcription factor 7, partial [Chenopodium quinoa]
WRKY22/29	AUR62040434	WRKY17	normal	up	normal	normal	-0.766538	1.12367	-0.597917	-0.40858	WRKY DNA -binding domain	Probable WRKY transcription factor 69 OS=Arabidopsis thaliana OX=3702 GN=WRKY69 PE=2 SV=1	probable WRKY transcription factor 69 [Chenopodium quinoa]
WRKY22/29	AUR62043687	WRKY18	normal	up	normal	normal	-0.00937944	1.30791	-0.075001	0.772437	WRKY DNA -binding domain	Probable WRKY transcription factor 7 OS=Arabidopsis thaliana OX=3702 GN=WRKY7 PE=1 SV=1	probable WRKY transcription factor 7 [Chenopodium quinoa]
WRKY22/29	Chenopodium_quinoa_newGene_6545	WRKY19	normal	down	normal	down	-0.714109	-2.16	-0.269453	-1.26507	WRKY DNA -binding domain	Probable WRKY transcription factor 27 OS=Arabidopsis thaliana OX=3702 GN=WRKY27 PE=2 SV=1	disease resistance protein RRS1-like [Chenopodium quinoa]
H2O2
OXI1	AUR62022147	OXI1	normal	up	normal	up	0.388876	1.38918	0.232328	1.24984	Protein kinase domain	Serine/threonine-protein kinase OXI1 OS=Arabidopsis thaliana OX=3702 GN=OXI1 PE=1 SV=1	serine/threonine-protein kinase OXI1-like [Chenopodium quinoa]
ANP1	AUR62017682	MAP3K	normal	up	normal	normal	0.247505	1.02468	0.644058	-0.157397	Protein kinase domain	MAP3K epsilon protein kinase 1 OS=Arabidopsis thaliana OX=3702 GN=M3KE1 PE=1 SV=1	MAP3K epsilon protein kinase 1-like [Chenopodium quinoa]
ANP1	AUR62038080	NPK1-01	normal	up	normal	up	0.706439	1.4513	0.980942	1.0041	Protein kinase domain	Mitogen-activated protein kinase kinase kinase NPK1 OS=Nicotiana tabacum OX=4097 GN=NPK1 PE=1 SV=1	mitogen-activated protein kinase kinase kinase NPK1-like [Chenopodium quinoa]
ANP1	AUR62038175	NPK1-02	normal	up	normal	normal	0.908914	2.0313	1.35505	0.0281695	Protein kinase domain	Mitogen-activated protein kinase kinase kinase NPK1 OS=Nicotiana tabacum OX=4097 GN=NPK1 PE=1 SV=1	mitogen-activated protein kinase kinase kinase NPK1-like isoform X1 [Chenopodium quinoa]
MEKK1	AUR62039042	MEKK1	normal	down	normal	normal	-0.988428	-1.31227	-0.709292	-0.0985737	--	Protein OPAQUE10 OS=Zea mays OX=4577 GN=O10 PE=1 SV=1	uncharacterized protein LOC110686393 [Chenopodium quinoa]
MKK4/5	AUR62009694	LDSH6	--	up	--	--	--	3.08975	--	--	Protein of unknown function (DUF640)	Protein LIGHT-DEPENDENT SHORT HYPOCOTYLS 6 OS=Arabidopsis thaliana OX=3702 GN=LSH6 PE=1 SV=1	protein LIGHT-DEPENDENT SHORT HYPOCOTYLS 5-like [Chenopodium quinoa]
MKK4/5	AUR62042772	LDSH10	--	up	--	--	--	2.2184	--	--	Protein of unknown function (DUF640)	Protein LIGHT-DEPENDENT SHORT HYPOCOTYLS 10 OS=Arabidopsis thaliana OX=3702 GN=LSH10 PE=1 SV=1	protein LIGHT-DEPENDENT SHORT HYPOCOTYLS 10-like [Chenopodium quinoa]
MKK4/5	AUR62011850	LDSH4	normal	normal	normal	down	0.642446	-0.0671472	-0.628896	-1.44134	Protein of unknown function (DUF640)	Protein LIGHT-DEPENDENT SHORT HYPOCOTYLS 4 OS=Arabidopsis thaliana OX=3702 GN=LSH4 PE=1 SV=1	uncharacterized protein LOC110734339 [Chenopodium quinoa]
MPK3/6	AUR62025042	MPK3	normal	up	normal	normal	-0.801603	1.99233	-0.934937	-0.350755	Protein kinase domain	Mitogen-activated protein kinase 3 OS=Arabidopsis thaliana OX=3702 GN=MPK3 PE=1 SV=2	mitogen-activated protein kinase 3-like [Chenopodium quinoa]
NDPK2	AUR62005970	NDPK2-01	normal	up	normal	normal	0.496292	1.28171	0.665528	0.64004	Putative serine esterase (DUF676)	--	protein FAM135A-like isoform X1 [Chenopodium quinoa]
NDPK2	AUR62001287	NDPK2-02	normal	down	normal	normal	-0.767842	-4.60592	-0.579213	-1.2398	Nucleoside diphosphate kinase	Nucleoside diphosphate kinase 2, chloroplastic OS=Spinacia oleracea OX=3562 GN=NDPK2 PE=1 SV=1	nucleoside diphosphate kinase 2, chloroplastic-like [Chenopodium quinoa]
NDPK2	AUR62010846	NDPK2-03	normal	down	normal	normal	-0.16506	-1.76408	-0.183355	-0.544508	Nucleoside diphosphate kinase	Nucleoside diphosphate kinase 4, chloroplastic OS=Spinacia oleracea OX=3562 GN=NDK4 PE=1 SV=1	uncharacterized protein LOC110722512 [Chenopodium quinoa]
NDPK2	AUR62019845	NDPK2-04	normal	down	normal	normal	-0.142038	-1.27405	-0.426291	-0.284283	Nucleoside diphosphate kinase	Nucleoside diphosphate kinase 4, chloroplastic OS=Spinacia oleracea OX=3562 GN=NDK4 PE=1 SV=1	uncharacterized protein LOC110722512 [Chenopodium quinoa]
NDPK2	AUR62025717	NDPK2-05	normal	down	normal	down	-0.806922	-3.60043	-0.610737	-1.12852	Nucleoside diphosphate kinase	Nucleoside diphosphate kinase 2, chloroplastic OS=Spinacia oleracea OX=3562 GN=NDPK2 PE=1 SV=1	nucleoside diphosphate kinase 2, chloroplastic [Chenopodium quinoa]
WRKY22/29	AUR62003924	WRKY12	normal	up	normal	normal	0.455604	2.24448	-0.288523	0.5045	WRKY DNA -binding domain	Probable WRKY transcription factor 15 OS=Arabidopsis thaliana OX=3702 GN=WRKY15 PE=2 SV=1	probable WRKY transcription factor 15 [Chenopodium quinoa]
WRKY22/29	AUR62004902	WRKY13	up	up	--	up	1.49839	1.71453	--	2.42781	WRKY DNA -binding domain	Probable WRKY transcription factor 74 OS=Arabidopsis thaliana OX=3702 GN=WRKY74 PE=2 SV=2	probable WRKY transcription factor 21 isoform X1 [Chenopodium quinoa]
WRKY22/29	AUR62032241	WRKY14	normal	down	down	normal	-0.873961	-1.16591	-1.16161	-0.799996	Plant zinc cluster domain	Probable WRKY transcription factor 21 OS=Arabidopsis thaliana OX=3702 GN=WRKY21 PE=1 SV=1	probable WRKY transcription factor 21 [Chenopodium quinoa]
WRKY22/29	AUR62038238	WRKY15	normal	up	normal	normal	-0.0702746	1.63804	-0.456142	0.469274	WRKY DNA -binding domain	Probable WRKY transcription factor 15 OS=Arabidopsis thaliana OX=3702 GN=WRKY15 PE=2 SV=1	probable WRKY transcription factor 15 [Chenopodium quinoa]
WRKY22/29	AUR62038804	WRKY16	normal	up	normal	normal	0.0731626	1.48207	-0.107605	0.802548	WRKY DNA -binding domain	Probable WRKY transcription factor 7 OS=Arabidopsis thaliana OX=3702 GN=WRKY7 PE=1 SV=1	probable WRKY transcription factor 7, partial [Chenopodium quinoa]
WRKY22/29	AUR62040434	WRKY17	normal	up	normal	normal	-0.766538	1.12367	-0.597917	-0.40858	WRKY DNA -binding domain	Probable WRKY transcription factor 69 OS=Arabidopsis thaliana OX=3702 GN=WRKY69 PE=2 SV=1	probable WRKY transcription factor 69 [Chenopodium quinoa]
WRKY22/29	AUR62043687	WRKY18	normal	up	normal	normal	-0.00937944	1.30791	-0.075001	0.772437	WRKY DNA -binding domain	Probable WRKY transcription factor 7 OS=Arabidopsis thaliana OX=3702 GN=WRKY7 PE=1 SV=1	probable WRKY transcription factor 7 [Chenopodium quinoa]
WRKY22/29	Chenopodium_quinoa_newGene_6545	WRKY19	normal	down	normal	down	-0.714109	-2.16	-0.269453	-1.26507	WRKY DNA -binding domain	Probable WRKY transcription factor 27 OS=Arabidopsis thaliana OX=3702 GN=WRKY27 PE=2 SV=1	disease resistance protein RRS1-like [Chenopodium quinoa]
Ethylne
RAN1	AUR62010592	HMA5-01	up	up	normal	normal	1.44592	1.85776	0.893431	1.14646	E1-E2 ATPase	Probable copper-transporting ATPase HMA5 OS=Arabidopsis thaliana OX=3702 GN=HMA5 PE=1 SV=2	probable copper-transporting ATPase HMA5 isoform X2 [Chenopodium quinoa]
RAN1	AUR62010593	HMA5-02	--	up	--	--	--	4.455	--	--	E1-E2 ATPase	Probable copper-transporting ATPase HMA5 OS=Arabidopsis thaliana OX=3702 GN=HMA5 PE=1 SV=2	probable copper-transporting ATPase HMA5 [Chenopodium quinoa]
RAN1	AUR62019275	HMA4-01	normal	up	normal	normal	0.101168	1.16835	0.44084	0.888149	E1-E2 ATPase	Copper-transporting ATPase HMA4 OS=Oryza sativa subsp. japonica OX=39947 GN=HMA4 PE=1 SV=1	copper-transporting ATPase HMA4-like isoform X1 [Chenopodium quinoa]
RAN1	AUR62019277	HMA4-02	normal	up	normal	normal	0.0699463	1.17321	0.103342	0.888456	E1-E2 ATPase	Copper-transporting ATPase HMA4 OS=Oryza sativa subsp. japonica OX=39947 GN=HMA4 PE=1 SV=1	copper-transporting ATPase HMA4-like isoform X1 [Chenopodium quinoa]
RAN1	Chenopodium_quinoa_newGene_8865	HMA4-03	normal	down	normal	normal	0.508221	-2.00594	-0.152432	-0.720775	haloacid dehalogenase-like hydrolase	Copper-transporting ATPase HMA4 OS=Oryza sativa subsp. japonica OX=39947 GN=HMA4 PE=1 SV=1	copper-transporting ATPase HMA4-like isoform X2 [Chenopodium quinoa]
ETR/ERS	AUR62002259	ETR01	up	up	normal	normal	1.32096	1.17669	0.163129	-0.303385	Response regulator receiver domain	Ethylene receptor 2 OS=Arabidopsis thaliana OX=3702 GN=ETR2 PE=1 SV=2	ethylene receptor 2-like [Chenopodium quinoa]
ETR/ERS	AUR62015476	ETR02	normal	up	normal	normal	1.03342	1.87956	0.521817	0.528678	Response regulator receiver domain	Ethylene receptor 2 OS=Arabidopsis thaliana OX=3702 GN=ETR2 PE=1 SV=2	ethylene receptor 2-like [Chenopodium quinoa]
ETR/ERS	AUR62008716	ETR03	up	up	normal	normal	0.300396	1.4079	0.418478	-0.157817	Histidine kinase-, DNA gyrase B-, and HSP90-like ATPase	Probable ethylene response sensor 1 OS=Oryza sativa subsp. indica OX=39946 GN=ERS1 PE=2 SV=1	probable ethylene response sensor 1 [Chenopodium quinoa]
ETR/ERS	AUR62025518	ETR04	normal	up	normal	normal	0.323028	1.25376	0.176852	-0.37716	Histidine kinase-, DNA gyrase B-, and HSP90-like ATPase	Probable ethylene response sensor 1 OS=Oryza sativa subsp. indica OX=39946 GN=ERS1 PE=2 SV=1	probable ethylene response sensor 1 [Chenopodium quinoa]
ETR/ERS	AUR62028548	ETR05	normal	up	normal	normal	0.367725	1.17603	0.401358	0.187979	Histidine kinase-, DNA gyrase B-, and HSP90-like ATPase	Ethylene receptor OS=Passiflora edulis OX=78168 GN=ETR1 PE=2 SV=1	ethylene receptor-like [Chenopodium quinoa]
ETR/ERS	AUR62033500	ETR06	normal	up	normal	normal	0.289264	1.59681	0.321649	0.216214	Histidine kinase-, DNA gyrase B-, and HSP90-like ATPase	Ethylene receptor OS=Passiflora edulis OX=78168 GN=ETR1 PE=2 SV=1	ethylene receptor-like [Chenopodium quinoa]
ETR/ERS	Chenopodium_quinoa_newGene_3812	ETR07	normal	down	normal	normal	-0.424963	-1.54136	-0.0989337	-0.597324	MULE transposase domain	Protein FAR1-RELATED SEQUENCE 5 OS=Arabidopsis thaliana OX=3702 GN=FRS5 PE=1 SV=1	protein FAR1-RELATED SEQUENCE 5-like [Chenopodium quinoa]
RTE1	AUR62022072	RTE1-01	up	normal	up	normal	1.33911	0.510569	1.36794	0.161131	Protein of unknown function (DUF778)	Protein REVERSION-TO-ETHYLENE SENSITIVITY1 OS=Arabidopsis thaliana OX=3702 GN=RTE1 PE=1 SV=1	protein REVERSION-TO-ETHYLENE SENSITIVITY1-like [Chenopodium quinoa]
RTE1	Chenopodium_quinoa_newGene_7878	RTE1-02	normal	down	normal	normal	-0.412829	-1.07805	-0.255604	-0.734969	Protein of unknown function (DUF778)	Protein RTE1-HOMOLOG OS=Arabidopsis thaliana OX=3702 GN=RTH PE=2 SV=1	protein RTE1-HOMOLOG-like isoform X1 [Chenopodium quinoa]
CTR1	AUR62008880	CTR1-01	normal	up	normal	normal	0.380707	2.49003	0.485787	0.789453	Protein tyrosine and serine/threonine kinase	Probable serine/threonine-protein kinase SIS8 OS=Arabidopsis thaliana OX=3702 GN=SIS8 PE=1 SV=1	uncharacterized protein LOC110728090 [Chenopodium quinoa]
CTR1	AUR62011256	CTR1-02	normal	up	normal	normal	0.690399	2.57881	0.477535	0.874482	Protein tyrosine and serine/threonine kinase	Serine/threonine-protein kinase CTR1 OS=Arabidopsis thaliana OX=3702 GN=CTR1 PE=1 SV=1	uncharacterized protein LOC110708075 isoform X1 [Chenopodium quinoa]
CTR1	AUR62031828	CTR1-03	normal	up	normal	normal	0.544337	1.78939	0.585264	0.574379	Protein tyrosine and serine/threonine kinase	Probable serine/threonine-protein kinase SIS8 OS=Arabidopsis thaliana OX=3702 GN=SIS8 PE=1 SV=1	uncharacterized protein LOC110731868 [Chenopodium quinoa]
CTR1	AUR62033580	CTR1-04	normal	up	normal	normal	0.168337	1.14332	0.704954	-0.149297	Ethylene-responsive protein kinase Le-CTR1	Serine/threonine-protein kinase CTR1 OS=Arabidopsis thaliana OX=3702 GN=CTR1 PE=1 SV=1	serine/threonine-protein kinase CTR1-like [Chenopodium quinoa]
CTR1	AUR62038349	CTR1-05	normal	up	normal	normal	0.390962	1.391	0.56414	0.0480729	Protein tyrosine and serine/threonine kinase	Probable serine/threonine-protein kinase SIS8 OS=Arabidopsis thaliana OX=3702 GN=SIS8 PE=1 SV=1	uncharacterized protein LOC110735099 isoform X1 [Chenopodium quinoa]
CTR1	AUR62041418	CTR1-06	normal	up	normal	normal	0.10307	1.06697	0.35965	-0.513099	Ethylene-responsive protein kinase Le-CTR1	Serine/threonine-protein kinase CTR1 OS=Arabidopsis thaliana OX=3702 GN=CTR1 PE=1 SV=1	serine/threonine-protein kinase CTR1-like [Chenopodium quinoa]
CTR1	AUR62041450	CTR1-07	up	up	normal	up	1.02365	2.76438	0.931014	1.15023	Protein tyrosine and serine/threonine kinase	Serine/threonine-protein kinase CTR1 OS=Arabidopsis thaliana OX=3702 GN=CTR1 PE=1 SV=1	uncharacterized protein LOC110711374 isoform X1 [Chenopodium quinoa]
CTR1	AUR62014357	CTR1-11	normal	down	normal	normal	-0.113938	-2.00676	0.533229	-0.850308	Ethylene-responsive protein kinase Le-CTR1	Serine/threonine-protein kinase CTR1 OS=Arabidopsis thaliana OX=3702 GN=CTR1 PE=1 SV=1	serine/threonine-protein kinase CTR1-like [Chenopodium quinoa]
CTR1	AUR62019099	CTR1-12	normal	down	normal	normal	-0.000727308	-1.83096	0.27543	-1.00562	Ethylene-responsive protein kinase Le-CTR1	Serine/threonine-protein kinase CTR1 OS=Arabidopsis thaliana OX=3702 GN=CTR1 PE=1 SV=1	serine/threonine-protein kinase CTR1-like [Chenopodium quinoa]
MPK3/6	AUR62025042	MPK3	normal	up	normal	normal	-0.801603	1.99233	-0.934937	-0.350755	Protein kinase domain	Mitogen-activated protein kinase 3 OS=Arabidopsis thaliana OX=3702 GN=MPK3 PE=1 SV=2	mitogen-activated protein kinase 3-like [Chenopodium quinoa]
EIN3/EIL	AUR62034106	EIN3-01	normal	up	normal	normal	0.51145	1.91923	0.693586	-0.0265791	Ethylene insensitive 3	Protein ETHYLENE INSENSITIVE 3 OS=Arabidopsis thaliana OX=3702 GN=EIN3 PE=1 SV=1	ETHYLENE INSENSITIVE 3-like 1 protein [Chenopodium quinoa]
EIN3/EIL	AUR62034108	EIN3-02	normal	up	normal	normal	0.276931	1.27853	0.471747	0.0535754	Ethylene insensitive 3	Protein ETHYLENE INSENSITIVE 3 OS=Arabidopsis thaliana OX=3702 GN=EIN3 PE=1 SV=1	ETHYLENE INSENSITIVE 3-like 1 protein [Chenopodium quinoa]
EIN3/EIL	AUR62041277	EIN3-03	normal	up	normal	normal	0.343959	1.29926	0.412648	0.263998	Ethylene insensitive 3	Protein ETHYLENE INSENSITIVE 3 OS=Arabidopsis thaliana OX=3702 GN=EIN3 PE=1 SV=1	ETHYLENE INSENSITIVE 3-like 1 protein [Chenopodium quinoa]
XRN4	AUR62000967	XRN4-01	normal	up	normal	normal	0.287493	1.11033	0.609139	0.457105	Xrn1 helical domain	5'-3' exoribonuclease 4 OS=Arabidopsis thaliana OX=3702 GN=XRN4 PE=1 SV=1	5'-3' exoribonuclease 4-like [Chenopodium quinoa]
XRN4	AUR62004998	XRN4-02	normal	up	normal	normal	0.436896	1.10288	0.75395	0.332351	Xrn1 helical domain	5'-3' exoribonuclease 4 OS=Arabidopsis thaliana OX=3702 GN=XRN4 PE=1 SV=1	5'-3' exoribonuclease 4-like [Chenopodium quinoa]
EBF1/2	AUR62011140	F-box01	up	up	up	up	3.10757	3.3124	1.80071	1.44227	Leucine Rich repeat	EIN3-binding F-box protein 1 OS=Arabidopsis thaliana OX=3702 GN=EBF1 PE=1 SV=1	EIN3-binding F-box protein 2-like [Chenopodium quinoa]
EBF1/2	AUR62012391	F-box02	up	up	up	up	0.776524	1.45739	0.558027	0.0335433	Leucine Rich repeat	EIN3-binding F-box protein 1 OS=Arabidopsis thaliana OX=3702 GN=EBF1 PE=1 SV=1	EIN3-binding F-box protein 1-like [Chenopodium quinoa]
EBF1/2	AUR62013347	F-box03	normal	up	normal	normal	2.35732	3.55651	1.25611	1.40342	Leucine Rich repeat	EIN3-binding F-box protein 1 OS=Arabidopsis thaliana OX=3702 GN=EBF1 PE=1 SV=1	EIN3-binding F-box protein 1-like [Chenopodium quinoa]
EBF1/2	AUR62031513	F-box04	normal	up	normal	normal	0.983757	1.52282	0.732689	-0.117464	Leucine Rich repeat	EIN3-binding F-box protein 1 OS=Arabidopsis thaliana OX=3702 GN=EBF1 PE=1 SV=1	EIN3-binding F-box protein 1-like [Chenopodium quinoa]
EIN2	AUR62022345	EIN2-01	normal	up	normal	normal	0.292935	1.06149	0.482357	-0.057907	Natural resistance-associated macrophage protein	Ethylene-insensitive protein 2 OS=Arabidopsis thaliana OX=3702 GN=EIN2 PE=1 SV=1	LOW QUALITY PROTEIN: ethylene-insensitive protein 2-like [Chenopodium quinoa]
EIN2	AUR62034361	EIN2-02	normal	up	normal	normal	0.392287	1.19109	0.711089	-0.118872	Natural resistance-associated macrophage protein	Ethylene-insensitive protein 2 OS=Arabidopsis thaliana OX=3702 GN=EIN2 PE=1 SV=1	ethylene-insensitive protein 2-like [Chenopodium quinoa]
ERF1	AUR62002113	ERF01	up	normal	normal	down	-0.553145	2.43607	--	1.81563	AP2 domain	Ethylene-responsive transcription factor ERF095 OS=Arabidopsis thaliana OX=3702 GN=ERF095 PE=1 SV=1	ethylene-responsive transcription factor ERF095-like [Chenopodium quinoa]
ERF1	AUR62028234	ERF02	up	normal	normal	down	1.27857	4.61	--	2.16775	AP2 domain	Ethylene-responsive transcription factor ERF095 OS=Arabidopsis thaliana OX=3702 GN=ERF095 PE=1 SV=1	ethylene-responsive transcription factor ERF095-like [Chenopodium quinoa]
ERF1	AUR62011878	ERF03	up	up	--	up	1.12704	0.227274	-0.0458463	-1.07762	AP2 domain	Ethylene-response factor C3 OS=Solanum lycopersicum OX=4081 GN=ERF.C.3 PE=2 SV=1	ethylene-responsive transcription factor 1B-like [Chenopodium quinoa]
ERF1	AUR62024721	ERF04	normal	up	--	up	1.08922	0.0507224	-0.368428	-1.03921	AP2 domain	Ethylene-response factor C3 OS=Solanum lycopersicum OX=4081 GN=ERF.C.3 PE=2 SV=1	ethylene-responsive transcription factor 1B-like [Chenopodium quinoa]
CHIB	AUR62003223	CHIB01	down	up	down	--	-1.63389	3.43279	-4.20781	--	Chitin recognition protein	Antimicrobial peptide 2 OS=Amaranthus caudatus OX=3567 PE=1 SV=2	hypothetical protein SOVF_020890 [Spinacia oleracea]
CHIB	AUR62003224	CHIB02	down	up	down	--	-2.95121	3.375	-2.74837	--	Chitin recognition protein	Antimicrobial peptide Ar-AMP OS=Amaranthus retroflexus OX=124763 PE=1 SV=1	hypothetical protein SOVF_020890 [Spinacia oleracea]
CHIB	AUR62027251	CHIB03	up	normal	normal	down	--	6.60361	--	4.84295	Chitin recognition protein	--	lectin-C-like [Chenopodium quinoa]
CHIB	AUR62019040	CHIB04	down	up	normal	normal	-1.10075	1.6145	-0.437366	0.229694	Chitinase class I	Basic endochitinase OS=Vitis vinifera OX=29760 GN=CHIT1B PE=2 SV=1	basic endochitinase-like [Chenopodium quinoa]
CHIB	AUR62027877	CHIB05	up	normal	normal	down	-0.560232	4.72095	-0.466924	-0.00564984	Chitinase class I	Basic endochitinase OS=Vitis vinifera OX=29760 GN=CHIT1B PE=2 SV=1	basic endochitinase-like [Chenopodium quinoa]
CHIB	AUR62037102	CHIB06	--	up	--	up	-0.291698	-1.38928	-0.155786	-0.784378	Chitinase class I	Chitinase-like protein 1 OS=Arabidopsis thaliana OX=3702 GN=CTL1 PE=1 SV=1	chitinase-like protein 1 [Chenopodium quinoa]
CHIB	AUR62042364	CHIB07	normal	up	normal	normal	-0.126667	-1.11705	0.032022	-0.709956	Chitinase class I	Chitinase-like protein 1 OS=Arabidopsis thaliana OX=3702 GN=CTL1 PE=1 SV=1	chitinase-like protein 1 [Chenopodium quinoa]
CHIB	AUR62011878	ERF05	normal	down	normal	normal	1.12704	0.227274	-0.0458463	-1.07762	AP2 domain	Ethylene-response factor C3 OS=Solanum lycopersicum OX=4081 GN=ERF.C.3 PE=2 SV=1	ethylene-responsive transcription factor 1B-like [Chenopodium quinoa]
CHIB	AUR62024721	ERF06	normal	down	normal	normal	1.08922	0.0507224	-0.368428	-1.03921	AP2 domain	Ethylene-response factor C3 OS=Solanum lycopersicum OX=4081 GN=ERF.C.3 PE=2 SV=1	ethylene-responsive transcription factor 1B-like [Chenopodium quinoa]
Salt
PYR/PYL	AUR62004471	PYL01	up	normal	normal	normal	1.39111	-0.567066	0.450992	0.462711	Polyketide cyclase / dehydrase and lipid transport	Abscisic acid receptor PYL8 OS=Arabidopsis thaliana OX=3702 GN=PYL8 PE=1 SV=1	abscisic acid receptor PYL8-like [Chenopodium quinoa]
PYR/PYL	AUR62023479	PYL02	up	normal	normal	normal	1.82717	-0.186359	0.36033	-0.0554513	Polyketide cyclase / dehydrase and lipid transport	Abscisic acid receptor PYL9 OS=Arabidopsis thaliana OX=3702 GN=PYL9 PE=1 SV=1	abscisic acid receptor PYL9-like [Chenopodium quinoa]
PYR/PYL	AUR62022950	PYL03	down	--	down	--	-2.40785	--	-3.06711	--	Polyketide cyclase / dehydrase and lipid transport	Abscisic acid receptor PYL4 OS=Arabidopsis thaliana OX=3702 GN=PYL4 PE=1 SV=1	abscisic acid receptor PYL4-like [Chenopodium quinoa]
PYR/PYL	AUR62030521	PYL04	down	--	down	--	-1.3352	--	-1.38522	--	Polyketide cyclase / dehydrase and lipid transport	Abscisic acid receptor PYL4 OS=Arabidopsis thaliana OX=3702 GN=PYL4 PE=1 SV=1	abscisic acid receptor PYL4-like [Chenopodium quinoa]
PYR/PYL	AUR62007289	PYL05	normal	down	normal	normal	-0.859371	-1.72328	-0.183273	-0.522738	Polyketide cyclase / dehydrase and lipid transport	Abscisic acid receptor PYL1 OS=Arabidopsis thaliana OX=3702 GN=PYL1 PE=1 SV=1	abscisic acid receptor PYR1-like [Chenopodium quinoa]
PP2C	AUR62001731	PP2C01	up	up	up	up	3.73077	4.14571	3.06243	3.322	Protein phosphatase 2C	Protein phosphatase 2C 3 OS=Arabidopsis thaliana OX=3702 GN=AIP1 PE=1 SV=1	probable protein phosphatase 2C 24 isoform X2 [Chenopodium quinoa]
PP2C	AUR62006130	PP2C02	up	up	normal	up	2.52188	5.88216	1.05864	4.01684	Protein phosphatase 2C	Probable protein phosphatase 2C 8 OS=Oryza sativa subsp. japonica OX=39947 GN=Os01g0656200 PE=2 SV=1	probable protein phosphatase 2C 8 isoform X1 [Chenopodium quinoa]
PP2C	AUR62010911	PP2C03	--	up	--	--	1.55363	1.82547	1.62646	1.16118	Protein phosphatase 2C	Probable protein phosphatase 2C 6 OS=Oryza sativa subsp. japonica OX=39947 GN=PP2C06 PE=1 SV=1	probable protein phosphatase 2C 6 [Chenopodium quinoa]
PP2C	AUR62012136	PP2C04	--	up	--	--	1.40433	-0.270825	0.627112	0.563775	Protein phosphatase 2C	Protein phosphatase 2C 37 OS=Arabidopsis thaliana OX=3702 GN=PP2CA PE=1 SV=1	protein phosphatase 2C 37-like [Chenopodium quinoa]
PP2C	AUR62019358	PP2C05	up	up	up	up	2.7523	4.76907	2.22169	3.63992	Protein phosphatase 2C	Probable protein phosphatase 2C 8 OS=Oryza sativa subsp. japonica OX=39947 GN=Os01g0656200 PE=2 SV=1	probable protein phosphatase 2C 8 [Chenopodium quinoa]
PP2C	AUR62021414	PP2C06	up	normal	normal	normal	1.50343	2.0301	1.84829	1.60084	Protein phosphatase 2C	Probable protein phosphatase 2C 6 OS=Oryza sativa subsp. japonica OX=39947 GN=PP2C06 PE=1 SV=1	probable protein phosphatase 2C 6 [Chenopodium quinoa]
PP2C	AUR62040699	PP2C07	up	up	up	up	1.36466	-0.633668	0.193013	0.329322	Protein phosphatase 2C	Protein phosphatase 2C 37 OS=Arabidopsis thaliana OX=3702 GN=PP2CA PE=1 SV=1	protein phosphatase 2C 37-like [Chenopodium quinoa]
PP2C	AUR62010834	PP2C08	--	up	--	--	--	3.45307	--	--	Protein phosphatase 2C	Probable protein phosphatase 2C 8 OS=Oryza sativa subsp. japonica OX=39947 GN=Os01g0656200 PE=2 SV=1	probable protein phosphatase 2C 8 [Chenopodium quinoa]
PP2C	AUR62010835	PP2C09	--	up	--	normal	--	6.97999	--	--	Protein phosphatase 2C	Probable protein phosphatase 2C 8 OS=Oryza sativa subsp. japonica OX=39947 GN=Os01g0656200 PE=2 SV=1	probable protein phosphatase 2C 8 [Chenopodium quinoa]
PP2C	AUR62019833	PP2C10	up	up	up	up	--	6.88252	--	--	Protein phosphatase 2C	Probable protein phosphatase 2C 8 OS=Oryza sativa subsp. japonica OX=39947 GN=Os01g0656200 PE=2 SV=1	probable protein phosphatase 2C 8 [Chenopodium quinoa]
PP2C	AUR62020044	PP2C11	normal	up	normal	normal	--	8.00328	--	1.80538	Protein phosphatase 2C	Probable protein phosphatase 2C 24 OS=Arabidopsis thaliana OX=3702 GN=At2g29380 PE=1 SV=1	probable protein phosphatase 2C 24 [Chenopodium quinoa]
PP2C	AUR62025109	PP2C12	normal	up	normal	normal	0.57964	1.12954	0.705118	0.149595	Protein phosphatase 2C	Protein phosphatase 2C 53 OS=Oryza sativa subsp. japonica OX=39947 GN=PP2C53 PE=1 SV=1	probable protein phosphatase 2C 50 [Chenopodium quinoa]
PP2C	AUR62029021	PP2C13	up	normal	normal	normal	0.617038	1.28567	0.693275	0.178278	Protein phosphatase 2C	Protein phosphatase 2C 53 OS=Oryza sativa subsp. japonica OX=39947 GN=PP2C53 PE=1 SV=1	probable protein phosphatase 2C 50 [Chenopodium quinoa]
PP2C	AUR62042678	PP2C14	normal	down	normal	normal	-0.268675	-1.23897	-0.00844223	-0.668722	Protein phosphatase 2C	Probable protein phosphatase 2C 52 OS=Arabidopsis thaliana OX=3702 GN=At4g03415 PE=1 SV=1	probable protein phosphatase 2C 52 [Chenopodium quinoa]
PP2C	Chenopodium_quinoa_newGene_2186	PP2C15	normal	normal	down	normal	0.00706618	0.253382	-1.25646	-0.307499	Protein phosphatase 2C	Probable protein phosphatase 2C 12 OS=Oryza sativa subsp. japonica OX=39947 GN=Os02g0224100 PE=2 SV=1	probable protein phosphatase 2C 12 [Chenopodium quinoa]
SNRK2	AUR62001966	SnRK2-01	normal	down	normal	normal	0.661397	2.02719	0.571185	0.651243	Protein kinase domain	Serine/threonine-protein kinase SRK2I OS=Arabidopsis thaliana OX=3702 GN=SRK2I PE=1 SV=1	serine/threonine-protein kinase SRK2I-like [Chenopodium quinoa]
SNRK2	AUR62003254	SnRK2-02	normal	up	normal	normal	1.26514	1.63206	0.638309	1.00411	Protein kinase domain	Serine/threonine-protein kinase SAPK2 OS=Oryza sativa subsp. indica OX=39946 GN=SAPK2 PE=2 SV=2	serine/threonine-protein kinase SAPK1-like [Chenopodium quinoa]
SNRK2	AUR62003840	SnRK2-03	up	up	normal	normal	0.881635	2.50768	0.732378	0.853718	Protein kinase domain	Serine/threonine-protein kinase SRK2I OS=Arabidopsis thaliana OX=3702 GN=SRK2I PE=1 SV=1	serine/threonine-protein kinase SRK2I-like [Chenopodium quinoa]
SNRK2	AUR62018955	SnRK2-04	normal	up	normal	normal	0.918293	2.31406	0.104945	-0.147669	Protein kinase domain	Serine/threonine-protein kinase SRK2E OS=Arabidopsis thaliana OX=3702 GN=SRK2E PE=1 SV=1	serine/threonine-protein kinase SAPK2-like [Chenopodium quinoa]
SNRK2	AUR62027801	SnRK2-05	down	down	normal	up	1.17176	3.00616	0.536916	1.12641	Protein kinase domain	Serine/threonine-protein kinase SAPK2 OS=Oryza sativa subsp. indica OX=39946 GN=SAPK2 PE=2 SV=2	serine/threonine-protein kinase SAPK2-like isoform X1 [Chenopodium quinoa]
SNRK2	AUR62003399	SnRK2-06	normal	down	normal	normal	-0.264169	-1.12846	-0.647887	-0.0108767	Cobalt transport protein	Protein ABCI12, chloroplastic OS=Arabidopsis thaliana OX=3702 GN=ABCI12 PE=1 SV=1	protein ABCI12, chloroplastic-like [Chenopodium quinoa]
SNRK2	AUR62007175	SnRK2-07	down	normal	normal	normal	-1.56082	-1.07495	-0.430757	1.2393	Protein kinase domain	Serine/threonine-protein kinase SAPK3 OS=Oryza sativa subsp. indica OX=39946 GN=SAPK3 PE=1 SV=2	serine/threonine-protein kinase SAPK3-like [Chenopodium quinoa]
SNRK2	AUR62016637	SnRK2-08	normal	up	normal	normal	-0.069745	-1.11162	0.000427123	-0.903948	Protein kinase domain	Serine/threonine-protein kinase SRK2E OS=Arabidopsis thaliana OX=3702 GN=SRK2E PE=1 SV=1	serine/threonine-protein kinase SRK2E-like isoform X1 [Chenopodium quinoa]
SNRK2	AUR62018830	SnRK2-09	up	up	normal	up	-1.08938	0.265059	-0.101308	1.03891	Protein kinase domain	Serine/threonine-protein kinase SAPK3 OS=Oryza sativa subsp. indica OX=39946 GN=SAPK3 PE=1 SV=2	serine/threonine-protein kinase SAPK3-like [Chenopodium quinoa]
MAPKKK17/18	AUR62001919	MAPKKK-01	normal	up	normal	normal	0.535851	2.01572	0.260063	0.870159	Protein kinase domain	Mitogen-activated protein kinase kinase kinase 20 OS=Arabidopsis thaliana OX=3702 GN=MAPKKK20 PE=1 SV=1	mitogen-activated protein kinase kinase kinase 17-like [Chenopodium quinoa]
MAPKKK17/18	AUR62003889	MAPKKK-02	normal	up	normal	normal	0.423878	4.13067	0.472068	1.34578	Protein kinase domain	Mitogen-activated protein kinase kinase kinase 20 OS=Arabidopsis thaliana OX=3702 GN=MAPKKK20 PE=1 SV=1	mitogen-activated protein kinase kinase kinase 17-like [Chenopodium quinoa]
MKK3	AUR62020359	MKK3-01	normal	up	normal	normal	0.642833	1.16993	0.531896	0.0800541	Protein kinase domain	Mitogen-activated protein kinase kinase 3 OS=Arabidopsis thaliana OX=3702 GN=MKK3 PE=1 SV=1	mitogen-activated protein kinase kinase 3-like [Chenopodium quinoa]
MKK3	AUR62026127	MKK3-02	normal	up	normal	normal	0.394145	1.07203	0.595755	0.373805	Protein kinase domain	Mitogen-activated protein kinase kinase 3 OS=Arabidopsis thaliana OX=3702 GN=MKK3 PE=1 SV=1	mitogen-activated protein kinase kinase 3-like [Chenopodium quinoa]
MPK1/2,7/14	AUR62014485	NTF3-01	normal	up	normal	normal	0.891943	1.88135	0.335932	0.593507	Protein kinase domain	Mitogen-activated protein kinase homolog NTF3 OS=Nicotiana tabacum OX=4097 GN=NTF3 PE=1 SV=1	mitogen-activated protein kinase homolog NTF3 [Chenopodium quinoa]
MPK1/2,7/14	AUR62034515	NTF3-02	normal	up	normal	normal	0.549145	1.35439	0.398109	0.204687	Protein kinase domain	Mitogen-activated protein kinase homolog NTF3 OS=Nicotiana tabacum OX=4097 GN=NTF3 PE=1 SV=1	mitogen-activated protein kinase homolog NTF3-like [Chenopodium quinoa]
MPK1/2,7/14	Chenopodium_quinoa_newGene_11362	Un-protein	normal	down	normal	normal	-0.160455	-1.16771	-0.240959	0.407464	Reverse transcriptase-like	--	uncharacterized protein LOC110712252 [Chenopodium quinoa]
MPK1/2,7/14	AUR62001731	PP2C-01	up	up	up	up	3.73077	4.14571	3.06243	3.322	Protein phosphatase 2C	Protein phosphatase 2C 3 OS=Arabidopsis thaliana OX=3702 GN=AIP1 PE=1 SV=1	probable protein phosphatase 2C 24 isoform X2 [Chenopodium quinoa]
EPF1/2
ER/ERLs	AUR62009075	ERECTA-01	normal	down	--	normal	0.42625	-0.862878	1.10478	-2.18731	Leucine rich repeat	LRR receptor-like serine/threonine-protein kinase ERECTA OS=Arabidopsis thaliana OX=3702 GN=ERECTA PE=1 SV=1	LRR receptor-like serine/threonine-protein kinase ERECTA [Chenopodium quinoa]
ER/ERLs	AUR62020592	ERECTA-02	normal	normal	normal	down	0.973131	0.498087	1.58581	-0.662032	Leucine rich repeat	LRR receptor-like serine/threonine-protein kinase ERECTA OS=Arabidopsis thaliana OX=3702 GN=ERECTA PE=1 SV=1	LRR receptor-like serine/threonine-protein kinase ERECTA [Chenopodium quinoa]
ER/ERLs	AUR62035317	ERECTA-03	normal	down	normal	normal	0.105963	1.52266	0.314057	0.10946	Leucine rich repeat	Probable leucine-rich repeat receptor-like protein kinase At5g63930 OS=Arabidopsis thaliana OX=3702 GN=At5g63930 PE=1 SV=1	probable leucine-rich repeat receptor-like protein kinase At5g63930 [Chenopodium quinoa]
ER/ERLs	AUR62038958	R-S/T-P-kinase-04	normal	down	normal	normal	-0.149403	-2.00016	0.577498	-1.21043	Protein kinase domain	Inactive leucine-rich repeat receptor-like serine/threonine-protein kinase At1g60630 OS=Arabidopsis thaliana OX=3702 GN=At1g60630 PE=2 SV=1	inactive leucine-rich repeat receptor-like serine/threonine-protein kinase At1g60630 [Chenopodium quinoa]
ER/ERLs	AUR62024367	ZAR1	normal	normal	up	normal	0.436988	-2.13964	--	--	Protein tyrosine and serine/threonine kinase	Receptor protein kinase-like protein ZAR1 OS=Arabidopsis thaliana OX=3702 GN=ZAR1 PE=1 SV=1	receptor protein kinase-like protein ZAR1 [Chenopodium quinoa]
ER/ERLs	AUR62010539	R-S/T-P-kinase-01	normal	down	--	--	-0.620011	-2.56206	-0.587206	-1.04546	Protein kinase domain	Probable LRR receptor-like serine/threonine-protein kinase At1g12460 OS=Arabidopsis thaliana OX=3702 GN=At1g12460 PE=1 SV=1	probable LRR receptor-like serine/threonine-protein kinase At1g12460 [Chenopodium quinoa]
ER/ERLs	AUR62017356	R-S/T-P-kinase-02	normal	up	normal	normal	-0.608768	-2.92266	-0.422336	-0.33197	Protein kinase domain	Probable LRR receptor-like serine/threonine-protein kinase At1g12460 OS=Arabidopsis thaliana OX=3702 GN=At1g12460 PE=1 SV=1	probable LRR receptor-like serine/threonine-protein kinase At1g12460 [Chenopodium quinoa]
ER/ERLs	AUR62005594	ZAR1	normal	down	normal	normal	0.233567	-1.90005	--	-0.380611	Protein kinase domain	Receptor protein kinase-like protein ZAR1 OS=Arabidopsis thaliana OX=3702 GN=ZAR1 PE=1 SV=1	receptor protein kinase-like protein ZAR1 [Chenopodium quinoa]
ER/ERLs	AUR62039569	R-S/T-P-kinase-03	normal	normal	normal	down	0.389208	-1.05982	0.243536	-1.24707	Protein kinase domain	Receptor-like serine/threonine-protein kinase At1g78530 OS=Arabidopsis thaliana OX=3702 GN=At1g78530 PE=2 SV=1	receptor-like serine/threonine-protein kinase At1g78530 isoform X1 [Chenopodium quinoa]
YODA	AUR62017188	YODA	normal	up	normal	normal	-0.334026	1.32013	0.0328471	-0.0419739	Protein kinase domain	Mitogen-activated protein kinase kinase kinase YODA OS=Arabidopsis thaliana OX=3702 GN=YDA PE=1 SV=1	mitogen-activated protein kinase kinase kinase YODA-like [Chenopodium quinoa]
MKK4/5	AUR62009694	PLDSH-01	--	up	--	--	--	3.08975	--	--	Protein of unknown function (DUF640)	Protein LIGHT-DEPENDENT SHORT HYPOCOTYLS 6 OS=Arabidopsis thaliana OX=3702 GN=LSH6 PE=1 SV=1	protein LIGHT-DEPENDENT SHORT HYPOCOTYLS 5-like [Chenopodium quinoa]
MKK4/5	AUR62042772	PLDSH-02	--	up	--	--	--	2.2184	--	--	Protein of unknown function (DUF640)	Protein LIGHT-DEPENDENT SHORT HYPOCOTYLS 10 OS=Arabidopsis thaliana OX=3702 GN=LSH10 PE=1 SV=1	protein LIGHT-DEPENDENT SHORT HYPOCOTYLS 10-like [Chenopodium quinoa]
MKK4/5	AUR62011850	PLDSH-03	normal	normal	normal	down	0.642446	-0.0671472	-0.628896	-1.44134	Protein of unknown function (DUF640)	Protein LIGHT-DEPENDENT SHORT HYPOCOTYLS 4 OS=Arabidopsis thaliana OX=3702 GN=LSH4 PE=1 SV=1	uncharacterized protein LOC110734339 [Chenopodium quinoa]
MPK3/6	AUR62025042	MPK3	normal	up	normal	normal	-0.801603	1.99233	-0.934937	-0.350755	Protein kinase domain	Mitogen-activated protein kinase 3 OS=Arabidopsis thaliana OX=3702 GN=MPK3 PE=1 SV=2	mitogen-activated protein kinase 3-like [Chenopodium quinoa]
SPCH	AUR62004564	BHLH15	normal	down	normal	down	-0.964515	-3.40436	-0.644708	-1.34938	Helix-loop-helix DNA-binding domain	Transcription factor bHLH70 OS=Arabidopsis thaliana OX=3702 GN=BHLH70 PE=2 SV=1	transcription factor bHLH57-like isoform X1 [Chenopodium quinoa]
SPCH	AUR62022678	BHLH16	normal	down	normal	normal	-1.52724	-4.28804	-1.20794	-1.64308	Helix-loop-helix DNA-binding domain	Transcription factor bHLH70 OS=Arabidopsis thaliana OX=3702 GN=BHLH70 PE=2 SV=1	transcription factor bHLH57-like isoform X2 [Chenopodium quinoa]
SPCH	AUR62020815	BHLH17	down	down	down	down	0.497166	-2.01487	0.138286	-1.37982	Helix-loop-helix DNA-binding domain	Transcription factor FAMA OS=Arabidopsis thaliana OX=3702 GN=FAMA PE=1 SV=1	transcription factor FAMA-like isoform X1 [Chenopodium quinoa]
SPCH	AUR62032920	BHLH18	normal	down	normal	normal	0.399609	-1.72059	0.0959675	-1.26115	--	Transcription factor FAMA OS=Arabidopsis thaliana OX=3702 GN=FAMA PE=1 SV=1	transcription factor FAMA-like isoform X2 [Chenopodium quinoa]
